# Supplementary material for: Effectiveness of workplace wellness programmes for dietary habits, overweight, and cardiometabolic health: a systematic review and meta-analysis
Source: PubMed Central journal article supplement — Lancet Public Health. Author manuscript; Available in PMC 2021 Nov 28. (PMC8627548; doi:10.1016/s2468-2667(21)00140-7), 2021-09
Supplement: NIHMS1736175-supplement-1.pdf [file NIHMS1736175-supplement-1.pdf]

# THE LANCET

## Public Health

### Supplementary appendix

This appendix formed part of the original submission and has been peer reviewed. We post it as supplied by the authors.

Supplement to: Peñalvo JL, Sagastume D, Mertens E, et al. Effectiveness of workplace wellness programmes for dietary habits, overweight, and cardiometabolic health: a systematic review and meta-analysis. *Lancet Public Health* 2021; **6**: e648–60.

Running title: Impact of workplace interventions on health

**Effectiveness of workplace wellness programs for dietary habits, overweight, and cardiometabolic health: a systematic review and meta-analysis**

Prof José L. Peñalvo, PhD<sup>1,2</sup>, Diana Sagastume, MSc<sup>1</sup>, Elly Mertens, PhD<sup>1</sup>, Irina Uzhova, PhD<sup>3</sup>, Jessica Smith, PhD<sup>2,4</sup>, Jason HY Wu, PhD<sup>5</sup>, Eve Bishop, MSc<sup>2</sup>, Jennifer Onopa, MSc<sup>2</sup>, Peilin Shi, MSc<sup>2</sup>, Prof Renata Micha, PhD<sup>2,6</sup>, and Prof Dariush Mozaffarian, PhD<sup>2</sup>

<sup>1</sup> Non-Communicable Diseases Unit, Department of Public Health, Institute of Tropical Medicine, Antwerp, Belgium.

<sup>2</sup> Friedman School of Nutrition Science and Policy, Tufts University, Boston, MA, USA.

<sup>3</sup> Department of Health and Nutritional Sciences, Institute of Technology Sligo, Sligo, Ireland.

<sup>4</sup> Bell Institute of Health and Nutrition, General Mills, Minneapolis, MN, USA.

<sup>5</sup> The George Institute for Global Health, Faculty of Medicine, University of New South Wales, Sydney, Australia.

<sup>6</sup> Department of Food Science & Human Nutrition | University of Thessaly, Greece.

**Correspondence**

Prof José L. Peñalvo, Institute of Tropical Medicine, Nationalestraat 155, 2000 Antwerp (Belgium). Email: [jpenalvo@itg.be](mailto:jpenalvo@itg.be)

**KEYWORDS**

Workplace wellness program; multi-component interventions; dietary behaviour; cardiometabolic risk markers.

## Table of Contents

|                                                                                                       |           |
|-------------------------------------------------------------------------------------------------------|-----------|
| Abbreviations .....                                                                                   | 4         |
| Section 1: Protocol .....                                                                             | 5         |
| Section 2: Materials and methods.....                                                                 | 7         |
| <b>2.1 Search terms .....</b>                                                                         | <b>7</b>  |
| Pubmed/MEDLINE.....                                                                                   | 7         |
| EMBASE (Biomedical database from Elsevier) .....                                                      | 7         |
| Web of Science.....                                                                                   | 8         |
| <b>2.2 Extracted information of eligible papers.....</b>                                              | <b>8</b>  |
| <b>Table S1. Bias assessment criteria .....</b>                                                       | <b>9</b>  |
| <b>2.3 Re-classification of the intervention components into intervention domains .....</b>           | <b>9</b>  |
| <b>Table S2. Study assumptions other than for standard error (SE) or effect size calculation ....</b> | <b>10</b> |
| <b>Table S3. Study assumptions for standard error and effect size calculation .....</b>               | <b>12</b> |
| Section 3. Results .....                                                                              | 16        |
| <b>Table S4. Summary of intervention studies on Worksites Wellness programs .....</b>                 | <b>16</b> |
| <b>Fig. S1. Forest plot fruit and vegetable consumption.....</b>                                      | <b>32</b> |
| <b>Fig. S2. Forest plot fruit intake .....</b>                                                        | <b>32</b> |
| <b>Fig. S3. Forest plot vegetable consumption.....</b>                                                | <b>33</b> |
| <b>Fig. S4. Forest plot total fat intake.....</b>                                                     | <b>33</b> |
| <b>Fig. S5. Forest plot saturated fat intake .....</b>                                                | <b>34</b> |
| <b>Fig. S6. Forest plot fibre intake.....</b>                                                         | <b>34</b> |
| <b>Fig. S7. Forest plot PUFA intake .....</b>                                                         | <b>35</b> |
| <b>Fig. S8. Forest plot weight .....</b>                                                              | <b>35</b> |
| <b>Fig. S9. Forest plot body mass index (BMI).....</b>                                                | <b>36</b> |
| <b>Fig. S10. Forest plot waist circumference .....</b>                                                | <b>36</b> |
| <b>Fig. S11. Forest plot body fat %.....</b>                                                          | <b>37</b> |
| <b>Fig. S12. Forest plot waist-to-hip ratio .....</b>                                                 | <b>37</b> |
| <b>Fig. S13. Forest plot % lean mass .....</b>                                                        | <b>38</b> |
| <b>Fig. S14. Forest plot Diastolic blood pressure.....</b>                                            | <b>38</b> |
| <b>Fig. S15. Forest plot systolic blood pressure .....</b>                                            | <b>39</b> |
| <b>Fig. S16. Forest plot fasting plasma glucose.....</b>                                              | <b>39</b> |
| <b>Fig. S17. Forest plot HDL-cholesterol .....</b>                                                    | <b>40</b> |
| <b>Fig. S18. Forest plot LDL-cholesterol.....</b>                                                     | <b>40</b> |
| <b>Fig. S19. Forest plot triglycerides .....</b>                                                      | <b>41</b> |
| <b>Fig. S20. Forest plot total cholesterol.....</b>                                                   | <b>41</b> |
| <b>Table S5. Univariate meta-regressions: Heterogeneity exploration for dietary outcomes .....</b>    | <b>42</b> |

|                                                                                                                                                                                                       |           |
|-------------------------------------------------------------------------------------------------------------------------------------------------------------------------------------------------------|-----------|
| <b>Table S6. Univariate meta-regressions: Heterogeneity exploration for anthropometric outcomes</b> .....                                                                                             | <b>45</b> |
| <b>Table S7. Univariate meta-regressions: Heterogeneity exploration for blood pressure and fasting glucose</b> .....                                                                                  | <b>48</b> |
| <b>Table S8. Univariate meta-regressions: Heterogeneity exploration for plasma lipids</b> .....                                                                                                       | <b>51</b> |
| <b>Table S9. Multivariate meta-regressions: Dietary habits and anthropometric outcomes</b> .....                                                                                                      | <b>54</b> |
| <b>Table S10. Multivariate meta-regressions: Cardiometabolic risk factors</b> .....                                                                                                                   | <b>56</b> |
| <b>Fig. S21. Funnel plot fruit and vegetable consumption</b> .....                                                                                                                                    | <b>58</b> |
| <b>Fig. S22. Funnel plot fruit intake</b> .....                                                                                                                                                       | <b>58</b> |
| <b>Fig. S23. Funnel plot vegetable consumption</b> .....                                                                                                                                              | <b>59</b> |
| <b>Fig. S24. Funnel plot total fat intake</b> .....                                                                                                                                                   | <b>59</b> |
| <b>Fig. S25. Funnel plot saturated fat intake</b> .....                                                                                                                                               | <b>60</b> |
| <b>Fig. S26. Funnel plot fibre intake</b> .....                                                                                                                                                       | <b>60</b> |
| <b>Fig. S27. Funnel plot PUFA intake</b> .....                                                                                                                                                        | <b>61</b> |
| <b>Fig. S28. Funnel plot weight</b> .....                                                                                                                                                             | <b>61</b> |
| <b>Fig. S29. Funnel plot body mass index (BMI)</b> .....                                                                                                                                              | <b>62</b> |
| <b>Fig. S30. Funnel plot waist circumference</b> .....                                                                                                                                                | <b>62</b> |
| <b>Fig. S31. Funnel plot body fat %</b> .....                                                                                                                                                         | <b>63</b> |
| <b>Fig. S32. Funnel plot waist-to-hip ratio</b> .....                                                                                                                                                 | <b>63</b> |
| <b>Fig. S33. Funnel plot % lean mass</b> .....                                                                                                                                                        | <b>64</b> |
| <b>Fig. S34. Funnel plot Diastolic blood pressure</b> .....                                                                                                                                           | <b>64</b> |
| <b>Fig. S35. Funnel plot Systolic blood pressure</b> .....                                                                                                                                            | <b>65</b> |
| <b>Fig. S36. Funnel plot fasting plasma glucose</b> .....                                                                                                                                             | <b>65</b> |
| <b>Fig. S37. Funnel plot HDL-cholesterol</b> .....                                                                                                                                                    | <b>66</b> |
| <b>Fig. S38. Funnel plot LDL-cholesterol</b> .....                                                                                                                                                    | <b>66</b> |
| <b>Fig. S39. Funnel plot triglycerides</b> .....                                                                                                                                                      | <b>67</b> |
| <b>Fig. S40. Funnel plot total cholesterol</b> .....                                                                                                                                                  | <b>67</b> |
| <b>Table S11. Assessment of small study effects by comparison between the observed vs corrected pooled effect sizes</b> .....                                                                         | <b>68</b> |
| <b>Table S12. Sensitivity analysis for randomised controlled trials: Pooled estimates of the effect (change) of WWPs on dietary habits, anthropometric measurements and clinical parameters</b> ..... | <b>69</b> |
| <b>Table S13. Randomised controlled trials: Comparison between the observed vs corrected pooled effect sizes for publication bias</b> .....                                                           | <b>70</b> |
| <b>References</b> .....                                                                                                                                                                               | <b>71</b> |



## **Abbreviations**

WWPs: Workplaces wellness programs  
WHO: World Health Organization  
NCDs: Non-communicable Diseases  
T2DM: Type 2 Diabetes Mellitus  
SBP: Systolic blood pressure  
DBP: Diastolic blood pressure  
BMI: Body mass index  
WC: Waist circumference  
SE: Standard error  
95%CI: 95% confidence interval  
CVD: Cardiovascular disease  
PUFA: Polyunsaturated fatty acids  
WHR: Waist-to-hip ratio  
FPG: Fasting plasma glucose  
HDL: High-density lipoprotein cholesterol  
LDL: Low-density lipoprotein cholesterol  
TG: Triglycerides  
T-Cho: Total cholesterol  
LMIC: Low-middle income countries

## Section 1: Protocol

### Study Protocol

#### Objective

To conduct a systematic review and meta-analysis of the impact of workplace wellness programs on dietary change and measures of cardiometabolic risk factors.

#### Methods

The recommendations of the Meta-analysis of Observational Studies in Epidemiology (MOOSE) and the Preferred Reporting Items for Systematic Reviews and Meta-Analyses (PRISMA) guidelines will be followed for observational studies and randomised control trials (RCTs), respectively, during all stages of the design, implementation, and reporting of this meta-analysis.

#### Definition of Exposure and Outcomes:

1. *Exposure/Intervention:* Any multicomponent workplace wellness intervention or financial incentives offered in the workplace that targets improvements in diet and/or adiposity of the general workforce.
2. *Outcome:* Any change in adiposity, cardiometabolic risk factors, or diet.

#### Inclusion criteria

1. *Design:* Interventional (randomised or quasi-experimental) controlled trials were eligible that assess the above relationships. Commentaries, protocols, or review articles will be included as a source of references.
2. *Population:* Adult populations in the workplace. Any intervention that targets the overall workplace and not specific individuals or groups except for those that target overweight or obese groups.
3. *Setting:* Any workplace.
4. *Exposure/Intervention:* Multicomponent interventions that use multiple approaches simultaneously, including, for example, education, cafeteria and/or vending machine changes, promotion of stair use, financial incentives, changes to health insurance policies, and improved accessibility to, or discounts for, gym memberships, that target dietary changes and/or weight loss.
5. *Outcome:*
  - a. changes in adiposity (body weight, BMI, waist circumference, skinfold, body fat percentage);
  - b. change in dietary behaviours as measured by FFQ, 24-hr recall or dietary records or cafeteria purchases
  - c. biomarker changes (blood pressure, cholesterol, apolipoproteins, triglycerides, and plasma glucose and insulin) or changes to comprehensive risk scores;
  - d. disease outcome, if available.
6. *Effect measure:* Studies have to provide an estimate of the difference in the outcome specified and a measure of uncertainty for the reported difference, or report the relative risk estimates (or odds ratio) for other outcomes with standard error (or information to compute them; or such data can be obtained from authors).
7. *Language:* English

#### Exclusion Criteria

1. *Design:* observational studies, quasi-experimental without an external control or comparison group, studies using ecological, theoretical (laboratory experiments), simulation (modelling) designs. Commentaries and reviews will be included in the initial screening as a source of references. Duplicate publications from the same study will also be included in the initial screening for further assessment of the full-text. In such cases, the decision will be made after an assessment of the full-text of the articles and based on the quality assessment of each study.
2. *Population:* children and any non-employed individuals or any intervention aimed solely towards disease-specific management i.e. workplace wellness programs for individuals with type 2 diabetes
3. *Setting:* schools, non-workplace organizations e.g. community centres or religious organization
4. *Exposure/Interventions:*

- a. Focused, single-component programs (the impact of other focused interventions, such as front-of-label packing, point-of-purchase menu changes, and food pricing) will be evaluated in separate meta-analyses)
  - b. Tailored individual-level interventions that are not part of a multi-component intervention, even if these take place within a worksite.
  - c. Only a workplace health screening program without a multicomponent intervention
  - d. work/life balance programs that do not target an improvement in adiposity outcomes or dietary outcomes
  - e. smoking cessation only programs
5. *Outcome:* changes in attitude regarding health, diet, physical activity or changes in health care costs to the company, absenteeism, changes in mental health, overall wellbeing or quality of life
  6. *Date:* Published before 1990.
  7. *Language:* Non-English articles.

Databases:

1. *1<sup>st</sup> broad search:*
  - a. PubMed/MEDLINE
  - b. Embase (Biomedical database from Elsevier)
  - c. EconLit (Economic-related literature)
  - d. PAIS International (Public Affairs Information Services)
  - e. USDA-ERS (US Department of Agriculture-Economic Research Service)
  - f. The Cochrane Library
  - g. Web of Knowledge; Web of Science, CABI (CAB Abstracts and Global Health)
  - h. CINAHL (Cumulative Index to Nursing and Allied Health Literature)
  - i. Faculty of 1000
  - j. ERIC (Education Resources Information Center)
2. *2<sup>nd</sup> search:*
  - a. additional online searches
  - b. hand searches of citations
  - c. policy statements and guidance from the Institute of Medicine, World Health Organization, Centers for Disease Control and Prevention, US Department of Health and Human Services and other similar international, national and local agencies
  - d. communication with key contacts and experts in the field

## Section 2: Materials and methods

### 2.1 Search terms

#### Pubmed/MEDLINE

Limits: 1990-2020

("workplace"[Mesh] OR workplace[title/abstract] OR worksite[title/abstract] OR occupation[title/abstract] OR "employment"[Mesh] OR employment[title/abstract] OR employee\*[title/abstract] OR employer\*[title/abstract] OR office[title/abstract] OR "occupational health"[Mesh] OR "occupational health services"[Mesh]) AND

("health promotion"[Mesh] OR "health promotion"[title/abstract] OR "health education"[Mesh] OR "health education"[title/abstract] OR "employee incentive plans"[Mesh] OR "employee incentive plan"[title/abstract] OR "behavior therapy"[Mesh] OR "counseling"[Mesh] OR counseling[title/abstract] OR counselling[title/abstract] OR "health benefit plans, employee"[Mesh] OR "health benefit plan\*" [title/abstract] OR "health services/prevention and control"[Mesh] OR prevention[title/abstract] OR "nutritional sciences/education"[Mesh] OR "nutrition education"[title/abstract] OR "obesity/diet therapy"[Mesh] OR "diet therapy"[title/abstract] OR "obesity/therapy"[Mesh] OR "obesity/prevention and control"[Mesh] OR "overweight/therapy"[Mesh] OR "primary prevention"[Mesh] OR "diet/prevention and control"[Mesh] OR "diet/therapy"[Mesh] OR "economic incentive"[title/abstract])

AND

("weight loss"[Mesh] OR "weight loss"[title/abstract] OR "body composition"[Mesh] OR "body composition"[title/abstract] OR "body fat distribution"[title/abstract] OR adiposity[title/abstract] OR "body mass index"[Mesh] OR "body mass index"[title/abstract] OR "waist circumference"[Mesh] OR "waist circumference"[title/abstract] OR "waist-hip ratio"[Mesh] OR "waist to hip ratio"[title/abstract] OR WHR[title/abstract] OR "abdominal obesity"[title/abstract] OR "central obesity"[title/abstract] OR "diabetes Mellitus, type 2/prevention and control"[Mesh] OR diabetes[title/abstract] OR "blood glucose"[Mesh] OR "blood glucose"[title/abstract] OR "hyperglycemia/prevention and control"[Mesh] OR hyperglycemia[title/abstract] OR hyperglycaemia[title/abstract] OR "insulin resistance/prevention and control"[Mesh] OR "insulin resistance"[title/abstract] OR "blood pressure"[Mesh] OR "blood pressure"[title/abstract] OR "cardiovascular diseases/prevention and control"[Mesh] OR "cardiovascular disease\*" [title/abstract] OR "heart disease\*" [title/abstract] OR hypertension[title/abstract] OR "cholesterol/blood"[Mesh] OR cholesterol[title/abstract] OR "lipoproteins/blood"[Mesh] OR lipoprotein\*[title/abstract] OR apolipoprotein[title/abstract] OR triglyceride\*[title/abstract] OR "blood lipids"[title/abstract] OR "heart diseases/prevention and control"[Mesh] OR "food habits"[Mesh] OR food[title/abstract] OR "beverages"[Mesh] OR beverage\*[title/abstract] OR obesity[title/abstract] OR overweight[title/abstract] OR nutrition[title/abstract] OR fruit\*[title/abstract] OR vegetable\*[title/abstract] OR soda\*[title/abstract] OR juice\*[title/abstract] OR meat\*[title/abstract] OR "junk food\*" [title/abstract] OR "fast food\*" [title/abstract] OR dairy[title/abstract] OR candy[title/abstract] OR candies[title/abstract] OR "fruit drink\*" [title/abstract] OR "energy drink\*" [title/abstract] OR fat[title/abstract] OR fats[title/abstract] OR oil\*[title/abstract] OR saturated[title/abstract] OR "trans fatty"[title/abstract] OR "trans fat"[title/abstract] OR "trans fats"[title/abstract] OR "omega-3"[title/abstract] OR polyunsaturated[title/abstract] OR unsaturated[title/abstract] OR monounsaturated[title/abstract] OR "dietary carbohydrates"[Mesh] OR carbohydrate[title/abstract] OR "dietary proteins"[Mesh] OR protein[title/abstract] OR macronutrient[title/abstract] OR "sodium, dietary"[Mesh] OR sodium[title/abstract] OR salt[title/abstract] OR sugar\*[title/abstract] OR "processed food\*" [title/abstract] OR "diet"[Mesh] OR diet[title/abstract] OR "disease management"[Mesh] OR "disease management"[title/abstract])

#### EMBASE (Biomedical database from Elsevier)

([male]/lim OR [female]/lim) AND ([adult]/lim OR [middle aged]/lim OR [aged]/lim) AND [humans]/lim AND [1990-2020]/py 'workplace'/exp/mj OR 'employee'/exp/mj OR 'office worker'/exp/mj OR 'occupational health'/exp/mj OR 'work environment'/exp/mj AND [1990-2014]/py AND 'health promotion'/exp/mj OR 'health education'/exp/mj OR 'employee incentive plan':ta,ab OR 'health program'/exp/mj OR 'nutrition education'/exp/mj OR 'diet therapy'/exp/mj OR 'primary prevention'/exp/mj OR 'lifestyle modification'/exp/mj OR 'occupational health'/exp/mj OR 'occupational health services'/exp/mj OR 'worksite wellness program' AND [1990-2020]/py AND 'weight reduction'/exp/mj OR 'blood glucose level'/exp/mj OR 'hyperglycemia'/exp/mj OR 'insulin resistance'/exp/mj OR 'cardiovascular disease'/exp/mj OR 'hypertension'/exp/mj OR 'high density lipoprotein'/exp/mj OR 'lipid'/exp/mj OR 'low density lipoprotein cholesterol'/exp/mj OR 'cholesterol'/exp/mj OR 'triacylglycerol'/exp/mj OR 'food'/exp/mj OR 'beverage'/exp/mj OR 'obesity'/exp/mj OR 'cardiovascular risk'/exp/mj OR 'weight control'/exp/mj AND [1990-2020]/py

Web of Science

Limits: 1990-2020

Setting:

**TI**

workplace OR worksite OR occupation OR employment OR employee OR employer OR occupation

AND

**TS**

“health promotion” OR “health education” “employee incentive plan” OR “behavior therapy” OR “behaviour therapy” OR “health benefit plan” OR “nutrition education” OR “diet therapy” OR “primary prevention” OR “economic incentive”

AND

**TS**

“weight loss” OR “body composition” OR “body fat” OR “body mass index” OR diabetes OR “blood glucose” OR hyperglycaemia OR hyperglycemia OR “insulin resistance” OR “blood pressure” OR hypertension OR “cardiovascular disease” OR “heart disease” OR cholesterol OR lipoprotein OR triglyceride OR food OR beverage OR diet OR obesity OR overweight

The Cochrane Library

Limits: 1990-2020

Setting:

TI workplace OR TI employee OR TI employer OR TI worksite OR TI employment OR TI occupation

ERIC (Education Resources Information Center)

Limits: 1990-2019

**WORKPLACE**

TI workplace OR TI employee OR TI worksite OR TI employment OR TI occupation

AND

AB health promotion OR AB health education OR AB employee incentive program OR AB employee incentive plan OR AB behavior therapy OR AB employee coaching OR AB employee benefits OR AB prevention of chronic diseases OR AB nutrition counseling OR AB economic incentive OR AB diet therapy

AND

AB weight loss OR AB diet OR AB lipoproteins OR AB beverages OR AB diabetes OR AB blood glucose OR AB hyperglycemia OR AB insulin resistance OR AB heart disease OR AB hypertension prevention OR AB blood pressure OR cholesterol

**2.2 Extracted information of eligible papers**

A) *Publication details*: authors, year, study name, country, and overall quality score.

B) *Study design*: randomization and comparator details, unit of randomization, and intention-to-treat.

C) *Worksite details*: number and size of worksites, company type, and overall company size, percentage of eligible participants, percentage involved, and percentage unionized.

D) *Population details*: gender, mean age, race/ethnicity, and mean BMI.

E) *Intervention characteristics*: details on intervention sponsor, timing (paid hours), outreach to families, community and/or environment, and unit of the intervention (individual, group), duration of the intervention and follow up, percentage of participants lost to follow-up, intervention targets, and intervention components.

F) *Outcomes*: number of outcomes, outcome description, method of data collection, mean values, and measures of uncertainty at baseline and follow-up, subgroup analysis data

**Table S1. Bias assessment criteria**

| Criterion                           | Range | Description                                                                |
|-------------------------------------|-------|----------------------------------------------------------------------------|
| Design                              | 0-1   | 1 if randomised trial                                                      |
|                                     |       | 0 if quasi-experimental design of any kind                                 |
| Assessment of intervention/exposure | 0-1   | 1 if the intervention/exposure has been clearly defined and measured       |
|                                     |       | 0 if the intervention/exposure has not been clearly defined and measured   |
| Assessment of outcome               | 0-1   | 1 if the outcome has been clearly defined and measured                     |
|                                     |       | 0 if the outcome definition and measurement has not been clearly described |
| Control for confounding             | 0-1   | 1 if RCT or sufficient/ appropriate control for major confounders          |
|                                     |       | 0 if insufficient control for major confounders                            |
| Evidence of selection bias          | 0-1   | 1 if absence of evidence for selection bias                                |
|                                     |       | 0 if substantial presence of evidence for selection bias                   |

Each criterion received a score of 1 or 0 (1 indicating less probability of bias), and an overall bias score was calculated as the sum of individual scores; with 0-3 considered higher probability of bias

### 2.3 Re-classification of the intervention components into intervention domains

*A) Screening:* CVD/diabetes risk factor screening with or without individualized feedback, diet screening with or without individualized feedback, and physician advice.

*B) Individual education:* email/phone messaging, individual educational sessions, websites or web-based components, and newsletters addressing single or combined interventions targets as well as setting dietary or weight loss goals.

*C) Group education:* group educational sessions addressing single or combined intervention targets, peer-support groups and weight-loss contests without financial incentives.

*D) Food environment:* interventions in the cafeteria/canteen including menu offering, availability of healthy snacks, and interventions in vending machines.

*E) Labelling:* food labelling in the cafeteria/canteen, nutrition promotion/signage, or food labelling in vending machines such as health claims and nutritional information.

*F) Financial incentive:* incentives to improve overall health, CVD/diabetes, diet or other targets.

*G) Physical activity:* onsite or free/subsidized-membership gyms, classes or other activities, as well as the use of pedometers or wearable active trackers.

*H) Self-awareness:* mindfulness/meditation, and diet monitoring.

*I) Other:* components not included in previous groups, including employee advisory committees

**Table S2. Study assumptions other than for standard error (SE) or effect size calculation**

| Author, year               | Assumptions                                                                                                                                                                                                                                                                                                                              |
|----------------------------|------------------------------------------------------------------------------------------------------------------------------------------------------------------------------------------------------------------------------------------------------------------------------------------------------------------------------------------|
| Addley, 2014               | Assumed that analysis was only for completers based on presentation of the data (only one n-value)                                                                                                                                                                                                                                       |
| Agarwal, 2015              | None                                                                                                                                                                                                                                                                                                                                     |
| Allen, 2012                | None                                                                                                                                                                                                                                                                                                                                     |
| Almeida, 2015              | None                                                                                                                                                                                                                                                                                                                                     |
| Atlantis, 2006             | None                                                                                                                                                                                                                                                                                                                                     |
| Balk-Moller, 2017          | Assumed total population n=269                                                                                                                                                                                                                                                                                                           |
| Bandoni, 2010              | None                                                                                                                                                                                                                                                                                                                                     |
| Beresford, 2001            | None                                                                                                                                                                                                                                                                                                                                     |
| Bhiri, 2015                | None                                                                                                                                                                                                                                                                                                                                     |
| Braeckman, 1999            | None                                                                                                                                                                                                                                                                                                                                     |
| Campbell, 2002             | None                                                                                                                                                                                                                                                                                                                                     |
| Carr, 2016                 | Assumed total population n=54                                                                                                                                                                                                                                                                                                            |
| Cawley, 2009               | None                                                                                                                                                                                                                                                                                                                                     |
| Chen, 2008                 | None                                                                                                                                                                                                                                                                                                                                     |
| Chen, 2014                 | None                                                                                                                                                                                                                                                                                                                                     |
| Chen, 2016                 | None                                                                                                                                                                                                                                                                                                                                     |
| Choi, 2017                 | Assumed total population n=43                                                                                                                                                                                                                                                                                                            |
| Cook, 2011                 | None                                                                                                                                                                                                                                                                                                                                     |
| Danquah, 2017              | Assumed that the length of the intervention was 3 months                                                                                                                                                                                                                                                                                 |
| Doran, 2018                | None                                                                                                                                                                                                                                                                                                                                     |
| Doran 2018                 | The median age of the participants                                                                                                                                                                                                                                                                                                       |
| Edries, 2013               | None                                                                                                                                                                                                                                                                                                                                     |
| Elliot, 2007               | None                                                                                                                                                                                                                                                                                                                                     |
| Emmons, 1999               | Fibre data reported as g/1000 kcal. Because most results were reported in grams, we assumed a 2000kcal/day diet and multiplied difference by 2 in order to standardize                                                                                                                                                                   |
| Engbers, 2007              | None                                                                                                                                                                                                                                                                                                                                     |
| Engbers, 2006              | None                                                                                                                                                                                                                                                                                                                                     |
| Eshah, 2010                | None                                                                                                                                                                                                                                                                                                                                     |
| Faghri, 2014               | SBP and DBP not explicitly stated as mmHg in manuscript or tables. Assumed based on values that mmHg were the units used                                                                                                                                                                                                                 |
| Fernandez, 2015            | None                                                                                                                                                                                                                                                                                                                                     |
| Flannery, 2012             | None                                                                                                                                                                                                                                                                                                                                     |
| Fitzgerald, 2019           | Study with 3 arms.<br>In Fitzgerald 1 the extracted arms were group control and group education<br>Total population n=174<br>In Fitzgerald 2 the extracted arms were group control and group environment<br>Total population n=138<br>In Fitzgerald 3 the extracted arms were group control and group combined<br>Total population n=339 |
| Geaney, 2016               | SBP and DBP not explicitly stated as mmHg in manuscript or tables. Assumed based on values that mmHg were the units used                                                                                                                                                                                                                 |
| Gerstel, 2013              | None                                                                                                                                                                                                                                                                                                                                     |
| Glasgow, 1997              | None                                                                                                                                                                                                                                                                                                                                     |
| Glasgow, 1995              | None                                                                                                                                                                                                                                                                                                                                     |
| Goetzel, 2010              | None                                                                                                                                                                                                                                                                                                                                     |
| Gomel, 1997                | None                                                                                                                                                                                                                                                                                                                                     |
| Gomel, 1993                | None                                                                                                                                                                                                                                                                                                                                     |
| Gosliner, 2010             | None                                                                                                                                                                                                                                                                                                                                     |
| Guldan, 1992               | None                                                                                                                                                                                                                                                                                                                                     |
| Gysan, 2017                | None                                                                                                                                                                                                                                                                                                                                     |
| Iriyama, 2016              | Used 6-month data due to crossover design of intervention                                                                                                                                                                                                                                                                                |
| Hebert, 1993               | None                                                                                                                                                                                                                                                                                                                                     |
| Hossain, 2019              | Intervention with 4 arms.<br>In Hossain 1 the extracted arms were group A (intervention) and group B (control) In Hossain 2 the extracted arms were group C (intervention) and group D (control)                                                                                                                                         |
| Hunt, 1993                 | None                                                                                                                                                                                                                                                                                                                                     |
| Hutchinson, 2013           | None                                                                                                                                                                                                                                                                                                                                     |
| Jaime, 2013                | None                                                                                                                                                                                                                                                                                                                                     |
| Jamal, 2016                | None                                                                                                                                                                                                                                                                                                                                     |
| Jeffery, 1993              | None                                                                                                                                                                                                                                                                                                                                     |
| Johanning, 1996            | None                                                                                                                                                                                                                                                                                                                                     |
| Kamioka, 2009              | None                                                                                                                                                                                                                                                                                                                                     |
| Kouwenhoven-Pasmooij, 2018 | None                                                                                                                                                                                                                                                                                                                                     |
| Kuehl, 2014                | None                                                                                                                                                                                                                                                                                                                                     |
| Kushida, 2014              | Assumed that original data was collected in servings per day given table heading despite categorical reporting                                                                                                                                                                                                                           |
| Kwak, 2010                 | None                                                                                                                                                                                                                                                                                                                                     |
| Kwak, 2009                 | None                                                                                                                                                                                                                                                                                                                                     |
| LaCaille, 2016             | None                                                                                                                                                                                                                                                                                                                                     |
| Lassen, 2011               | None                                                                                                                                                                                                                                                                                                                                     |
| Lemon, 2014                | None                                                                                                                                                                                                                                                                                                                                     |
| Lemon, 2010                | None                                                                                                                                                                                                                                                                                                                                     |
| Lewis, 2015                | None                                                                                                                                                                                                                                                                                                                                     |

|                      |                                                                                                                                                                                                                                                                    |
|----------------------|--------------------------------------------------------------------------------------------------------------------------------------------------------------------------------------------------------------------------------------------------------------------|
| Limaye, 2017         | None                                                                                                                                                                                                                                                               |
| Lin, 2017            | Assumed total population n=138                                                                                                                                                                                                                                     |
| Lin, 2018            | None                                                                                                                                                                                                                                                               |
| Linde, 2012          | None                                                                                                                                                                                                                                                               |
| Lindquist, 1999      | None                                                                                                                                                                                                                                                               |
| Mache, 2015          | None                                                                                                                                                                                                                                                               |
| Mache, 2015          | None                                                                                                                                                                                                                                                               |
| Maes, 1998           | None                                                                                                                                                                                                                                                               |
| Mansi, 2015          | Table was not labeled. Units were assumed based on standard units used for BMI [Kg/M <sup>2</sup> ], Body fat [%], SBP [mmHg], DBP [mmHg], Waist circumference [cm], Weight [kg]                                                                                   |
| Meenan, 2010         | None                                                                                                                                                                                                                                                               |
| Miller, 2016         | None                                                                                                                                                                                                                                                               |
| Mills, 2007          | None                                                                                                                                                                                                                                                               |
| Morgan, 2011         | None                                                                                                                                                                                                                                                               |
| Moy, 2008            | None                                                                                                                                                                                                                                                               |
| Moy, 2006            | None                                                                                                                                                                                                                                                               |
| Olafsdottir, 2012    | None                                                                                                                                                                                                                                                               |
| Ostbye, 2015         | None                                                                                                                                                                                                                                                               |
| Pedersen, 2018       | None                                                                                                                                                                                                                                                               |
| Pegus, 2002          | None                                                                                                                                                                                                                                                               |
| Prabhakaran, 2009    | None                                                                                                                                                                                                                                                               |
| Peters, 2018         | None                                                                                                                                                                                                                                                               |
| Racette, 2009        | None                                                                                                                                                                                                                                                               |
| Rameshbabu, 2018     | None                                                                                                                                                                                                                                                               |
| Raymond, 2019        | Assumed total population n=748                                                                                                                                                                                                                                     |
| Reynolds, 1997       | None                                                                                                                                                                                                                                                               |
| Ribeiro, 2014        | None                                                                                                                                                                                                                                                               |
| Robbins, 2006        | None                                                                                                                                                                                                                                                               |
| Rowland, 2018        | None                                                                                                                                                                                                                                                               |
| Rusali I, 2018       | Assumed total population n=70                                                                                                                                                                                                                                      |
| Rusali II, 2018      | Assumed total population n=77                                                                                                                                                                                                                                      |
| Ryu, 2017            | Study with 3 arms.<br>In Ryu 1 the extracted arms are group1 (control) and group 2 (intervention). Total population n=524<br>In Ryu 2 the extracted arms are group1 (control) and group 3 (intervention). Total population n=490                                   |
| Saleh, 2010          | None                                                                                                                                                                                                                                                               |
| Salindari, 2013      | None                                                                                                                                                                                                                                                               |
| Scoggins, 2011       | None                                                                                                                                                                                                                                                               |
| Sforzo, 2012         | None                                                                                                                                                                                                                                                               |
| Shimizu, 2004        | None                                                                                                                                                                                                                                                               |
| Shrivastara, 2017    | Assumed total population n=267                                                                                                                                                                                                                                     |
| Siegel, 2010         | None                                                                                                                                                                                                                                                               |
| Smith-McLallen, 2017 | The loss of follow up was calculated based on the sample of the only outcome extracted (table 3, third follow up)                                                                                                                                                  |
| Song, 2019           | Extraction only of the treatment group and primary control<br>Loss of follow up was calculated based on the flow-chart and clinical biometrics (most conservative approach was used)                                                                               |
| Sorensen, 2005       | None                                                                                                                                                                                                                                                               |
| Sorensen, 1999       | None                                                                                                                                                                                                                                                               |
| Sorensen, 1996       | Fibre data reported as g/1000 kcal. Because most results were reported in grams, we assumed a 2000kcal/day diet and multiplied difference by 2 in order to standardize                                                                                             |
| Sorensen, 1992       | None                                                                                                                                                                                                                                                               |
| Steenhuis, 2004      | None                                                                                                                                                                                                                                                               |
| Stites, 2014         | None                                                                                                                                                                                                                                                               |
| Strijk, 2012         | None                                                                                                                                                                                                                                                               |
| Tan, 2016            | None                                                                                                                                                                                                                                                               |
| Terry, 2011          | None                                                                                                                                                                                                                                                               |
| Thompson, 2014       | None                                                                                                                                                                                                                                                               |
| Tucker, 2016         | None                                                                                                                                                                                                                                                               |
| van Berkel, 2014     | None                                                                                                                                                                                                                                                               |
| Velema, 2018         | None                                                                                                                                                                                                                                                               |
| Viester, 2018        | The duration of the intervention (6 months) and the duration of follow up (6 months)                                                                                                                                                                               |
| Viitasalo, 2015      | None                                                                                                                                                                                                                                                               |
| Vilela, 2015         | None                                                                                                                                                                                                                                                               |
| Wierenga, 2014       | Length of follow-up was reported as between 12 to 15 months. Assumed 12 months was intended length of follow-up and 15-month follow-up was the result of employee scheduling                                                                                       |
| Williams, 2014       | None                                                                                                                                                                                                                                                               |
| Wilson, 2016         | None                                                                                                                                                                                                                                                               |
| Wilson 1, 2016       | Study with 3 arms.<br>In Wilson 1 the extracted arms were group PHONE (intervention) and group SELF STUDY (control). Total population n=424. In Wilson 2 the extracted arms were group GROUP (intervention) and group SELF STUDY (control). Total population n=478 |
| Zoellner, 2016       | Assumed total population n=1460                                                                                                                                                                                                                                    |



**Table S3. Study assumptions for standard error and effect size calculation**

| Author, year       | Outcome(s)                                                            | Assumptions                                                                                                                                                                                                                                                                   |
|--------------------|-----------------------------------------------------------------------|-------------------------------------------------------------------------------------------------------------------------------------------------------------------------------------------------------------------------------------------------------------------------------|
| Addley, 2014       | BMI                                                                   | r= 0.9 between baseline and follow-up samples in intervention and control groups                                                                                                                                                                                              |
| Agarwal, 2015      | T-Cho, total fat, SFA                                                 | Dichotomous outcomes                                                                                                                                                                                                                                                          |
| Allen, 2012        | Total fat, BMI, weight, WC, SBP, DBP, T-Cho, HDL, LDL, TG, FPG        | r = 0.5 between baseline and follow-up samples in intervention and control groups                                                                                                                                                                                             |
| Almeida, 2015      | BMI, fibre, fruits & vegetables                                       | r = 0.5 between baseline and follow-up samples in intervention and control groups                                                                                                                                                                                             |
| Atlantis, 2006     | BMI, weight, WC                                                       | None                                                                                                                                                                                                                                                                          |
| Balk-Moller, 2017  | Weight, body fat, WC, T-Cho<br>SBP, DBP<br>T-Cho                      | r=0.5 between baseline and follow-up samples in intervention and control groups for weight, body fat, WC, total cholesterol<br>r= 0.9 between baseline and follow-up samples in intervention and control groups for SBP and DBP.<br>Conversion from mmol/L to mg/dL of T--Cho |
| Bandoni, 2010      | Fruits, vegetables                                                    | None                                                                                                                                                                                                                                                                          |
| Beresford, 2001    | Fruits, vegetables                                                    | None                                                                                                                                                                                                                                                                          |
| Bhiri, 2015        | Fruits & vegetables                                                   | Dichotomous outcomes. r=0 baseline and follow-up used independent cross-sectional samples                                                                                                                                                                                     |
| Braeckman, 1999    | Total fat, BMI, WHR, T-Cho, HDL, SFA, PUFA                            | Post-intervention analysis controlled for baseline values as proxy for difference of changes analysis<br>T-Cho & HDL: 95% CI unit = mg/dL                                                                                                                                     |
| Campbell, 2002     | Fruits, vegetables, total fat                                         | r = 0.5 between baseline and follow up samples in intervention and control groups                                                                                                                                                                                             |
| Carr, 2016         |                                                                       | None                                                                                                                                                                                                                                                                          |
| Cawley, 2009       | Weight                                                                | Intervention 1 vs. control: p<0.05 for cumulative weight loss<br>Intervention 2 vs. control: p>0.05 for cumulative weight loss                                                                                                                                                |
| Chen, 2008         | SBP, DBP                                                              | SE was calculated from the estimate and p-values provided in the study. It was assumed that the p-values were from a t-test (Follow-up vs Baseline), using 0.05 as a conservative estimate.                                                                                   |
| Chen, 2014         | BMI, DBP, SBP, FPG, HDL, LDL, T-Cho, TG, vegetables, WC, weight       | r = 0.5 between baseline and follow-up samples in intervention and control groups .                                                                                                                                                                                           |
| Chen, 2016         | Vegetables, weight, BMI, WC, SBP, DBP, triglycerides, T-Cho, LDL, HDL | The effect size is calculated based on the full length of the study (intervention + follow up = 24 weeks)                                                                                                                                                                     |
| Choi, 2017         | WC, SBP, DBP, FPG, TG, HDL                                            | r= 0.9 between baseline and follow-up samples of intervention and control group.                                                                                                                                                                                              |
| Cook, 2011         | Total fat, BMI, weight, WC, SBP, DBP                                  | None                                                                                                                                                                                                                                                                          |
| Danquah, 2017      |                                                                       | None                                                                                                                                                                                                                                                                          |
| Doran, 2018        |                                                                       | None                                                                                                                                                                                                                                                                          |
| Doran, 2018        | BMI                                                                   | The follow-up SD of BMI from the control group was 8.4                                                                                                                                                                                                                        |
| Edries, 2013       |                                                                       | None                                                                                                                                                                                                                                                                          |
| Elliot, 2007       | Fruits, vegetables, total fat, BMI, weight                            | r = 0.9 between baseline and follow-up samples in intervention and control groups                                                                                                                                                                                             |
| Emmons, 1999       | Fruits, vegetables, total fat, fibre                                  | 95% CI normally distributed around effect size<br>Difference of changes effect size = control – treatment                                                                                                                                                                     |
| Engbers, 2007      | BMI, WC, SBP, DBP, T-Cho, HDL, LDL                                    | None                                                                                                                                                                                                                                                                          |
| Engbers, 2006      | Fruits, vegetables, total fat                                         | None                                                                                                                                                                                                                                                                          |
| Eshah, 2010        |                                                                       | None                                                                                                                                                                                                                                                                          |
| Faghri, 2014       | BMI, DBP, SBP, fruits & vegetables, WHR, weight                       | None                                                                                                                                                                                                                                                                          |
| Fernandez, 2015    | BMI, % overweight+ obese                                              | None                                                                                                                                                                                                                                                                          |
| Fitzgerald 1, 2019 | Total fat, SFA, Fibre                                                 | r= 0.9 between baseline and follow-up samples of intervention and control group                                                                                                                                                                                               |
| Fitzgerald 2, 2019 | Total fat, SFA, Fibre                                                 | r= 0.9 between baseline and follow-up samples of intervention and control group.                                                                                                                                                                                              |
| Fitzgerald 3, 2019 | Total fat, SFA, Fibre                                                 | r= 0.9 between baseline and follow-up samples of intervention and control group.                                                                                                                                                                                              |
| Flannery, 2012     | BMI, SBP, DBP, T-Cho, HDL, LDL, TG                                    | r = 0.5 between baseline and follow-up samples in intervention and control groups                                                                                                                                                                                             |
| French, 2010       | Fruits, vegetables, BMI, weight                                       | None                                                                                                                                                                                                                                                                          |
| Furuki, 1999       | BMI, SBP, DBP, T-Cho, HDL                                             | None                                                                                                                                                                                                                                                                          |
| Geaney, 2016       |                                                                       | None                                                                                                                                                                                                                                                                          |

|                            |                                                                   |                                                                                                                                                                                                                                                                                                  |
|----------------------------|-------------------------------------------------------------------|--------------------------------------------------------------------------------------------------------------------------------------------------------------------------------------------------------------------------------------------------------------------------------------------------|
| Gerstel, 2013              | Total fat, BMI, weight, body fat, WC, SBP, DBP, HDL, LDL, TG, FPG | None                                                                                                                                                                                                                                                                                             |
| Gysan, 2017                |                                                                   | None                                                                                                                                                                                                                                                                                             |
| Glasgow, 1997              | Total fat, T-Cho                                                  | None                                                                                                                                                                                                                                                                                             |
| Glasgow, 1995              | Total fat, T-Cho                                                  | None                                                                                                                                                                                                                                                                                             |
| Goetzel, 2010              | BMI, weight, T-Cho, FPG                                           | Dichotomous outcomes: $r = 0.9$ between baseline and follow-up samples in intervention and control groups                                                                                                                                                                                        |
| Gomel, 1997                |                                                                   | None                                                                                                                                                                                                                                                                                             |
| Gomel, 1993                |                                                                   | None                                                                                                                                                                                                                                                                                             |
| Gosliner, 2010             | Fruits, vegetables                                                | None                                                                                                                                                                                                                                                                                             |
| Guldan, 1992               |                                                                   | None                                                                                                                                                                                                                                                                                             |
| Iriyama, 2016              |                                                                   | None                                                                                                                                                                                                                                                                                             |
| Hebert, 1993               | SFA, PUFA                                                         | None                                                                                                                                                                                                                                                                                             |
| Hossain 1, 2019            |                                                                   | None                                                                                                                                                                                                                                                                                             |
| Hossain 2, 2019            | Weight                                                            | $r = 0.5$ between baseline and follow-up samples of intervention and control group.                                                                                                                                                                                                              |
| Hunt, 1993                 | Fruits, vegetables                                                | None                                                                                                                                                                                                                                                                                             |
| Hutchinson, 2013           | Fruits                                                            | $r = 0.5$ between baseline and follow-up samples in intervention and control groups                                                                                                                                                                                                              |
| Jaime, 2013                |                                                                   | None                                                                                                                                                                                                                                                                                             |
| Jamal, 2016                | T-Cho, LDL, HDL, TG, FPG                                          | Assumed the unit of these outcomes is mg/dL                                                                                                                                                                                                                                                      |
| Jeffery, 1993              | BMI                                                               | None                                                                                                                                                                                                                                                                                             |
| Johanning, 1996            | BMI, weight, SBP, DBP, T-Cho, HDL, LDL, TG                        | None                                                                                                                                                                                                                                                                                             |
| Kamioka, 2009              | BMI, weight, body fat, WC, T-Cho, HDL, LDL, TG, FPG               | $r = 0.9$ between baseline and follow-up samples in intervention and control groups                                                                                                                                                                                                              |
| Kouwenhoven-Pasmooij, 2018 |                                                                   | None                                                                                                                                                                                                                                                                                             |
| Kuehl, 2014                |                                                                   | $r = 0.5$ between baseline and follow-up samples in intervention and control groups                                                                                                                                                                                                              |
| Kushida, 2014              |                                                                   | None                                                                                                                                                                                                                                                                                             |
| Kwak, 2010                 | BMI, weight, WC                                                   | BMI: 24months data erroneous                                                                                                                                                                                                                                                                     |
| Kwak, 2009                 | BMI                                                               | Erroneous data for BMI outcome at 24months                                                                                                                                                                                                                                                       |
| LaCaille, 2016             |                                                                   | None                                                                                                                                                                                                                                                                                             |
| Lassen, 2011               | Fruits, vegetables, total fat, fibre, SFA                         | Fibre: 95% CI = (-1, 4)                                                                                                                                                                                                                                                                          |
| Lemon, 2014                |                                                                   | None                                                                                                                                                                                                                                                                                             |
| Lemon, 2010                |                                                                   | None                                                                                                                                                                                                                                                                                             |
| Lewis, 2015                |                                                                   | None                                                                                                                                                                                                                                                                                             |
| Limaye, 2017               | FPG, TG, T-Cho, HDL, LDL                                          | Conversion from mmol/L to mg/dL                                                                                                                                                                                                                                                                  |
| Lin, 2017                  | Weight, WC, SBP, DBP, FPG, TG, T-Cho, HDL, LDL,                   | $r = 0.9$ between baseline and follow-up samples of intervention and control group                                                                                                                                                                                                               |
| Lin, 2018                  | Weight, BMI, WC, SBP, DBP, T-Cho, HDL, LDL, TG, FPG               | $r = 0.9$ between baseline and follow-up samples in intervention and control groups                                                                                                                                                                                                              |
| Linde, 2012                | BMI                                                               | None                                                                                                                                                                                                                                                                                             |
| Lindquist, 1999            | SBP, DBP                                                          | $r = 0.9$ between baseline and follow-up samples in intervention and control groups                                                                                                                                                                                                              |
| Mache, 2015                |                                                                   | None                                                                                                                                                                                                                                                                                             |
| Mache, 2015                |                                                                   | None                                                                                                                                                                                                                                                                                             |
| Maes, 1998                 |                                                                   | None                                                                                                                                                                                                                                                                                             |
| Mansi, 2015                |                                                                   | None                                                                                                                                                                                                                                                                                             |
| Meenan, 2010               | BMI                                                               | $p > 0.05$ for difference in cumulative BMI change between intervention and control groups                                                                                                                                                                                                       |
| Miller, 2016               | Vegetables, fruits, PUFA                                          | The outcomes AHEI scores, outcome expectancies and recovery self-efficacy (13 outcomes out of 21) are given as a median and interquartile range. For the measure of variability "other" was selected and the interquartile range was introduced as the 95 CI but the SE could not be calculated. |

|                      |                                                     |                                                                                                                                                                                                      |
|----------------------|-----------------------------------------------------|------------------------------------------------------------------------------------------------------------------------------------------------------------------------------------------------------|
| Mills, 2007          |                                                     | None                                                                                                                                                                                                 |
| Morgan, 2011         | Fruits, vegetables, BMI, weight, WC, SBP, DBP       | None                                                                                                                                                                                                 |
| Moy, 2008            | Total fat, T-Cho, SFA, PUFA, MUFA                   | None                                                                                                                                                                                                 |
| Moy, 2006            | BMI, SBP, DBP, HDL, LDL, triglycerides, FPG         | None                                                                                                                                                                                                 |
| Olafsdottir, 2012    | BMI, weight, WC, BP, T-Cho, HDL, LDL, TG, FPG       | r = 0.9 between baseline and follow-up samples in intervention and control groups<br>Reported measure of variance = SD                                                                               |
| Ostbye, 2015         |                                                     | None                                                                                                                                                                                                 |
| Pedersen, 2018       | HDL                                                 | Conversion from mmol/L to mg/dL                                                                                                                                                                      |
| Pegus, 2002          |                                                     | None                                                                                                                                                                                                 |
| Peters, 2018         |                                                     | None                                                                                                                                                                                                 |
| Prabhakaran, 2009    | Weight, WC, SBP, DBP, T-Cho, HDL, TG, FPG           | None                                                                                                                                                                                                 |
| Racette, 2009        | BMI, weight, SBP, DBP, T-Cho, HDL, LDL, TG, FPG     | 95% CI normally distributed around effect size<br>Dichotomous outcomes: r = 0.9 between baseline and follow-up samples in intervention and control groups                                            |
| Rameshbabu, 2018     | SFA                                                 | Assumed it was ITT.                                                                                                                                                                                  |
| Raymond, 2019        | T-Cho, LDL, HDL, TG, BMI, WC                        | r= 0.9 between baseline and follow-up samples in intervention and control groups<br>Conversion from inches to cm for WC                                                                              |
| Reynolds, 1997       | Fruits, vegetables, T-Cho                           | T-Cho: p-value comparing full and partial intervention group changes to control group change (reported) = p-value comparing full intervention group change to control group change                   |
| Ribeiro, 2014        |                                                     | None                                                                                                                                                                                                 |
| Robbins, 2006        | Weight                                              | p>0.05 for difference in weight change between all intervention subgroups and control group                                                                                                          |
| Rowland, 2018        |                                                     | None                                                                                                                                                                                                 |
| Ryu 1, 2017          | WC, SBP, DBP, FPG, TG, HDL                          | r= 0.9 between baseline and follow-up samples of intervention and control group                                                                                                                      |
| Ryu 2, 2017          | WC, SBP, DBP, FPG, TG, HDL                          | r= 0.9 between baseline and follow-up samples of intervention and control group                                                                                                                      |
| Rusali I, 2018       | T-Cho, LDL, HDL, TG, FPG                            | Conversion from mmol/L to mg/dL                                                                                                                                                                      |
| Rusali II, 2018      | T-Cho, LDL, HDL, TG, FPG                            | Conversion from mmol/L to mg/dL                                                                                                                                                                      |
| Salindari, 2013      | BMI, weight, SBP, DBP, T-Cho, HDL, LDL, TG, FPG     | None                                                                                                                                                                                                 |
| Scoggins, 2011       | BMI                                                 | p-value for % BMI change = p-value for mean BMI change                                                                                                                                               |
| Sforzo, 2012         | BMI, weight, body fat, WHR, SBP, DBP                | r = 0.9 between baseline and follow-up samples in intervention and control groups                                                                                                                    |
| Shimizu, 2004        | BMI, SBP, DBP, T-Cho, HDL                           | BMI, SBP, DBP, T-Cho & HDL outcomes in older subgroup: adjusted for baseline differences in age, HDL & T-Cho<br>BMI, SBP, DBP outcomes in younger subgroup: adjusted for baseline differences in DBP |
| Shrivastra, 2017     | Weight, BMI, WC, SBP, DBP, FPG, T-Cho, HDL, LDL, TG | r= 0.9 between baseline and follow-up samples in intervention and control groups                                                                                                                     |
| Siegel, 2010         | Fruits, vegetables, BMI, WHR                        | r = 0.5 between baseline and follow-up samples in intervention and control groups                                                                                                                    |
| Smith-McLallen, 2017 |                                                     | None                                                                                                                                                                                                 |
| Song, 2019           |                                                     | None                                                                                                                                                                                                 |
| Sorensen, 2005       |                                                     | None                                                                                                                                                                                                 |
| Sorensen, 1999       | Fruits, vegetables                                  | None                                                                                                                                                                                                 |
| Sorensen, 1996       | Fruits, vegetables, total fat, fibre                | No exact sample size was reported but SE was reported                                                                                                                                                |
| Sorensen, 1992       | Total fat, fibre                                    | None                                                                                                                                                                                                 |
| Steenhuis, 2004      | Fruits, vegetables, total fat                       | r = 0.9 between baseline and follow-up samples in intervention and control groups                                                                                                                    |
| Stites, 2014         |                                                     | None                                                                                                                                                                                                 |
| Strijk, 2012         | Fruits                                              | None                                                                                                                                                                                                 |
| Tan, 2016            |                                                     | None                                                                                                                                                                                                 |
| Terry, 2011          |                                                     | None                                                                                                                                                                                                 |

|                  |                       |                                                                                 |
|------------------|-----------------------|---------------------------------------------------------------------------------|
| Thompson, 2014   |                       | None                                                                            |
| Tucker, 2016     |                       | None                                                                            |
| van Berkel, 2014 | Fruits                | None                                                                            |
| Veleva, 2018     |                       | None                                                                            |
| Viitasalo, 2015  |                       | None                                                                            |
| Vilela, 2015     |                       | None                                                                            |
| Viestar, 2018    | Vegetables and Fruits | Conversion from servings/week to servings/day from fruits and vegetables        |
| Wierenga, 2014   |                       | None                                                                            |
| Williams, 2014   |                       | None                                                                            |
| Wilson, 2016     |                       | None                                                                            |
| Wilson 1, 2016   | Weight                | Conversion from pounds to kg                                                    |
| Wilson 2, 2016   | Weight                | Conversion from pounds to kg                                                    |
| Zoellner, 2016   | Weight                | r= 0.9 between baseline and follow-up samples of intervention and control group |

BMI=body mass index; WC=waist circumference; WHR=waist-to-hip ratio; SBP=systolic blood pressure; DBP=diastolic blood pressure; T-Cho=total cholesterol; TG= triglycerides; LDL=low-density lipoprotein; HDL=high-density lipoprotein; FPG=fasting plasma glucose; PUFA=polyunsaturated fatty acids; SFA=saturated fatty acids

## Section 3. Results

**Table S4. Summary of intervention studies on Worksites Wellness programs**

| Author, year                   | Geographic Location | Design | Population                                                                                                                               | Intervention <sup>¶</sup>                                                                                                                                                                                                                                                                                                                                                                                                                                                                                                       | Intervention Duration (months) | Outcome(s)                                                     | Estimated Drop Out Rate (%) | Quality Score (0-low, 5-high) |
|--------------------------------|---------------------|--------|------------------------------------------------------------------------------------------------------------------------------------------|---------------------------------------------------------------------------------------------------------------------------------------------------------------------------------------------------------------------------------------------------------------------------------------------------------------------------------------------------------------------------------------------------------------------------------------------------------------------------------------------------------------------------------|--------------------------------|----------------------------------------------------------------|-----------------------------|-------------------------------|
| Addley, 2014 <sup>1</sup>      | Ireland             | RCT    | <ul style="list-style-type: none"> <li>• 180 employees</li> <li>• Northern Ireland Civil Service employees</li> </ul>                    | Nurse-led assessments of lifestyle and physical activity, website access to an online personal trainer with monitoring and motivational tools tailored to the individual participant.                                                                                                                                                                                                                                                                                                                                           | 12                             | BMI                                                            | 27.0                        | 4                             |
| Agarwal, 2015 <sup>2</sup>     | USA                 | RCT    | <ul style="list-style-type: none"> <li>• 292 employees</li> <li>• 10 GEICO corporate offices</li> </ul>                                  | Education on a low-fat vegan diet with weekly group meetings and group support.                                                                                                                                                                                                                                                                                                                                                                                                                                                 | 4.5                            | Not available <sup>††</sup>                                    | 27.4                        | 3                             |
| Allen, 2012 <sup>3</sup>       | USA                 | RCT    | <ul style="list-style-type: none"> <li>• 60 employees</li> <li>• University of New Hampshire Cooperative Extension</li> </ul>            | Lifestyle education sessions on CHD risk, diabetes and hypertension, sampling of foods, pedometers.                                                                                                                                                                                                                                                                                                                                                                                                                             | 10*                            | Total fat, BMI, weight, WC, SBP, DBP, T-Cho, HDL, LDL, TG, FPG | 8.3                         | 4                             |
| Almeida, 2015 <sup>4</sup>     | USA                 | RCT    | <ul style="list-style-type: none"> <li>• 1790 employees</li> <li>• 28 mixed worksites in Virginia</li> </ul>                             | Daily tailored emails, monetary incentives, comprehensive web-based support.                                                                                                                                                                                                                                                                                                                                                                                                                                                    | 12                             | BMI, fibre, fruits & vegetables, weight                        | 11.7                        | 5                             |
| Atlantis, 2006 <sup>5</sup>    | Australia           | RCT    | <ul style="list-style-type: none"> <li>• 73 healthy, sedentary employees</li> <li>• Casino</li> </ul>                                    | Aerobic exercise and whole-body weight training recommendations, general health education via group seminars, one-on-one counselling and worksite manual, goal setting, nonmonetary prizes.                                                                                                                                                                                                                                                                                                                                     | 6                              | BMI, weight, WC                                                | 42.5                        | 5                             |
| Balk-Moller, 2017 <sup>6</sup> | Denmark             | RCT    | <ul style="list-style-type: none"> <li>• 566 employees from 20 nursing homes in 6 municipalities in Denmark</li> </ul>                   | Web- and app-based tool (SoSo-life) with basic features on self-reporting of diet and exercise, personalized feedback, suggestions for activities and programs, and practical tips and tricks; social features on weekly assignments and colleague challenges; pledge; team competition; prize from a lottery ticket earned by team points.<br>Comparison group: underwent through the same health examinations as the intervention group, which provided information about the stand-alone effect of such health examinations. | 4*                             | Weight, body fat %, WC, SBP, DBP, T-Cho                        | 35.5                        | 4                             |
| Bandoni, 2010 <sup>7</sup>     | São Paulo, Brazil   | RCT    | <ul style="list-style-type: none"> <li>• 1,296 employees</li> <li>• 30 companies offering subsidized meals during the workday</li> </ul> | Educational materials on fruit and vegetable consumption (flip charts, posters), point of choice food labelling information.                                                                                                                                                                                                                                                                                                                                                                                                    | 6                              | Fruits, vegetables                                             | N/A <sup>‡</sup>            | 3                             |
| Beresford, 2001 <sup>8</sup>   | Seattle, USA        | RCT    | <ul style="list-style-type: none"> <li>• 2,828 employees</li> <li>• 28 mixed companies</li> </ul>                                        | Employee advisory board, nutrition promotion (posters, brochures, table tents, paycheck inserts, flyers, newsletters, food demonstrations, messages cards, tip sheets, self-help manual), point-of-purchase displays, food labelling.                                                                                                                                                                                                                                                                                           | 24                             | Fruits, vegetables                                             | 40.7 <sup>†</sup>           | 5                             |
| Bhiri, 2015 <sup>9</sup>       | Tunisia             | QE     | <ul style="list-style-type: none"> <li>• 1775 employees</li> <li>• 6 companies in Sousse</li> </ul>                                      | Education sessions and films, healthy diet and smoking cessation workshops, free physical activity sessions, free cessation consultations, and smoking bans.                                                                                                                                                                                                                                                                                                                                                                    | 36                             | Fruits & vegetables                                            | NA                          | 1                             |
| Braeckman, 1999 <sup>10</sup>  | Belgium             | RCT    | <ul style="list-style-type: none"> <li>• 770 male, blue-collar employees</li> <li>• 4 worksites</li> </ul>                               | Group education program on nutrition, personal counselling, risk factor screening and feedback, mass media on cholesterol and heart disease (posters, leaflets, video, newsletter)<br>Control intervention: risk factor screening results.                                                                                                                                                                                                                                                                                      | 3                              | Total fat, BMI, WHR, T-Cho, HDL, SFA, PUFA                     | 17.1                        | 4                             |

|                              |                             |     |                                                                                                                                                                                                    |                                                                                                                                                                                                                                                                                                                                                                                                                                                                                                                                                                                                                                                                                                                                                                                                                                       |     |                                                            |              |   |
|------------------------------|-----------------------------|-----|----------------------------------------------------------------------------------------------------------------------------------------------------------------------------------------------------|---------------------------------------------------------------------------------------------------------------------------------------------------------------------------------------------------------------------------------------------------------------------------------------------------------------------------------------------------------------------------------------------------------------------------------------------------------------------------------------------------------------------------------------------------------------------------------------------------------------------------------------------------------------------------------------------------------------------------------------------------------------------------------------------------------------------------------------|-----|------------------------------------------------------------|--------------|---|
| Campbell, 2002 <sup>11</sup> | North Carolina, USA         | RCT | <ul style="list-style-type: none"> <li>• 859 female employees</li> <li>• 9 textile, apparel or light manufacturing worksites</li> </ul>                                                            | <p>“Health Works for Women;” two individualized computer-tailored women’s health magazines that provided feedback, strategies for change and community resource information, selected natural helpers to obtain group health education, share information in the workplace, start walking groups and promote healthy vending machine choice.</p> <p>Control intervention: one computer-tailored magazine</p>                                                                                                                                                                                                                                                                                                                                                                                                                          | 18  | Fruits, vegetables, total fat                              | 37.4         | 4 |
| Carr, 2016 <sup>12</sup>     | USA                         | RCT | <ul style="list-style-type: none"> <li>• 60 office employees</li> <li>• 1 large private company</li> </ul>                                                                                         | <p>Access to portable seated elliptical machine placed underneath the desk, an iPod Touch with an application to view their daily pedalling progress, and a pedalling goal sheet to encourage the participants in addition to the intervention of the control group. Comparison group: received 30-minute face-to-face consultation aimed at optimising each employee’s computer workstation ergonomics. Participants were provided with tips for optimizing their workstation and workstation adjustments were implemented if needed. Also, participants were encouraged to shift posture regular and take breaks from sitting. They also received three weekly e-mails promoting posture, regular breaks from sitting, self-efficacy for physical activity, small changes to the work environment and tips for reducing stress.</p> | 4   | Not available <sup>††</sup>                                | 10           | 3 |
| Cawley, 2009 <sup>13</sup>   | USA                         | QE  | <ul style="list-style-type: none"> <li>• 2407 employees</li> <li>• 7 employers: HMO clinic, HMO office, two banking offices, two insurance offices, grocery store administrative office</li> </ul> | <p>Intervention I: Daily email coaching on weight loss, call-centre support, weigh-ins, financial incentives for weight loss including no fee and quarterly payments determined by % weight loss.</p> <p>Intervention II: Daily email coaching on weight loss, call-centre support, weigh-ins, financial incentives for weight including lottery and refunded payments for employees losing weight</p> <p>Control Intervention: Daily email coaching on weight loss, call-centre support.</p>                                                                                                                                                                                                                                                                                                                                         | 12  | Weight                                                     | 68.8         | 2 |
| Chen, 2008 <sup>14</sup>     | China                       | QE  | <ul style="list-style-type: none"> <li>• Capital Steel and Iron Company<sup>§</sup></li> </ul>                                                                                                     | <p>Health network setup, health education and promotion with emphasis on diet, health professional training for local practitioners and health workers, detecting and management of hypertension patients, disease and death surveillance, the building of healthier environment.</p>                                                                                                                                                                                                                                                                                                                                                                                                                                                                                                                                                 | 108 | SBP, DBP                                                   | Not reported | 1 |
| Chen, 2014 <sup>15</sup>     | Taiwan                      | QE  | <ul style="list-style-type: none"> <li>• 108 employees</li> <li>• 3 worksites</li> </ul>                                                                                                           | <p>Intervention varied from site to site and was not strictly enforced. Components may include lectures, workshops on healthy living, small biweekly group meetings, food and exercise logs, team challenges.</p>                                                                                                                                                                                                                                                                                                                                                                                                                                                                                                                                                                                                                     | 6   | BMI, DBP, SBP, HDL, LDL, T-Cho, TG, vegetables, WC, weight | 8.3          | 2 |
| Choi, 2017 <sup>16</sup>     | Korea                       | RCT | <ul style="list-style-type: none"> <li>• 68 office workers</li> <li>• Health center of a government office building in Korea</li> </ul>                                                            | <p>60-min sessions of t’ai chi exercise twice a week, text messages to encourage participants to practice t’ai chi at home. Health education on metabolic syndrome, modifiable and nonmodifiable risk factors, exercise and lifestyle, healthy diet, smoking cessation and stress management.</p> <p>Comparison group: received health education only and were offered to participate in t’ai chi classes after the study was completed.</p>                                                                                                                                                                                                                                                                                                                                                                                          | 3   | WC, SBP, DBP, FPG, TG, HDL                                 | 63           | 3 |
| Cook, 2011 <sup>17</sup>     | South Auckland, New Zealand | QE  | <ul style="list-style-type: none"> <li>• 253 male, hourly-paid employees</li> <li>• 2 manufacturing worksites</li> </ul>                                                                           | <p>Employee advisory board, workshop sessions on nutrition and non-communicable disease risk, safe use of alcohol and benefits of physical activity, nutrition displays in the cafeteria, point-of-choice messages.</p>                                                                                                                                                                                                                                                                                                                                                                                                                                                                                                                                                                                                               | 6   | Total fat, BMI, weight, WC, SBP, DBP                       | 5.9          | 3 |
| Danquah, 2017 <sup>18</sup>  | Denmark and Greenland       | RCT | <ul style="list-style-type: none"> <li>• 317 office workers</li> <li>• 4 workplaces</li> </ul>                                                                                                     | <p>Appointment of ambassadors and management support for common goals, environmental changes such as routes for walking meetings, lecture of sedentary behaviour and health. Workshops about the sit-stand desk, walking meetings, setting individual and common goals, and weekly emails and twice a week text messages including strategies from the workshop.</p>                                                                                                                                                                                                                                                                                                                                                                                                                                                                  | 3   | WC, body fat %, lean mass                                  | 28           | 4 |

|                             |                                                  |     |                                                                                                                                                                                                                                                              |                                                                                                                                                                                                                                                                                                                                                                                                                                                                                                                                                                                                                                                                                                                                                                                                                |      |                                            |      |   |
|-----------------------------|--------------------------------------------------|-----|--------------------------------------------------------------------------------------------------------------------------------------------------------------------------------------------------------------------------------------------------------------|----------------------------------------------------------------------------------------------------------------------------------------------------------------------------------------------------------------------------------------------------------------------------------------------------------------------------------------------------------------------------------------------------------------------------------------------------------------------------------------------------------------------------------------------------------------------------------------------------------------------------------------------------------------------------------------------------------------------------------------------------------------------------------------------------------------|------|--------------------------------------------|------|---|
| Doran, 2018 <sup>19</sup>   | East coast, USA                                  | RCT | <ul style="list-style-type: none"> <li>• 98 care workers</li> <li>• 4 long-term care facilities including multiple types of long-term care units, such as nursing homes, assistant living, independent living facilities, and dementia care units</li> </ul> | Environment and policy assessment with support for recommended changes, education, motivation and active engagement, technology-enhanced motivation, booster and long-term adherence.<br>Comparison group: health education.                                                                                                                                                                                                                                                                                                                                                                                                                                                                                                                                                                                   | 9    | Not available <sup>††</sup>                | 46.9 | 4 |
| Doran, 2018 <sup>20</sup>   | USA                                              | RCT | <ul style="list-style-type: none"> <li>• 98 hospital employees</li> <li>• 4 long-term care facilities in a metropolitan area of one East coast state</li> </ul>                                                                                              | The intervention was based on the theory of self-efficacy which included the following components: Environment and policy assessment with support for recommended changes, education, motivation and active engagement, technology-enhanced motivation, booster and long-term adherence.<br>Comparison group: health education.                                                                                                                                                                                                                                                                                                                                                                                                                                                                                | 9    | SBP, DPB, BMI, T-Cho                       | 46.9 | 4 |
| Edries, 2013 <sup>21</sup>  | Cape Town, South Africa                          | RCT | <ul style="list-style-type: none"> <li>• 80 employees</li> <li>• 3 clothing manufacturing companies</li> </ul>                                                                                                                                               | Group health promotion sessions on pain, back care, chronic disease of lifestyle, goal setting and pacing, physical activity, nutrition and relaxation, exercise classes, goal setting, health promotion pamphlets.<br>Control intervention: one group health promotion session and health promotion pamphlet.                                                                                                                                                                                                                                                                                                                                                                                                                                                                                                 | 1.5  | Not available <sup>††</sup>                | 0    | 4 |
| Elliot, 2007 <sup>22</sup>  | Oregon, USA                                      | RCT | <ul style="list-style-type: none"> <li>• 599 firefighters</li> <li>• 5 fire departments</li> </ul>                                                                                                                                                           | Intervention I: education sessions on nutrition, physical activity and energy balance, workbooks, team member tracking grid, self-assessment of baseline results, goal setting, health and fitness guide.<br>Intervention II: one-on-one motivational interviewing inclusive of health assessment review, goal setting and behaviour change planning, health and fitness guide.<br>Control intervention: self-assessment of baseline results.                                                                                                                                                                                                                                                                                                                                                                  | 12   | Fruits, vegetables, total fat, BMI, weight | 19.9 | 5 |
| Emmons, 1999 <sup>23</sup>  | Rhode Island and Southeastern Massachusetts, USA | RCT | <ul style="list-style-type: none"> <li>• 5414 employees</li> <li>• 26 manufacturing worksites</li> </ul>                                                                                                                                                     | Employee advisory board, self-assessment and feedback on smoking, nutrition and physical activity, posters, brochures, newsletters, self-help and self-skills management programs, cook-offs, poster contest, fitness challenges, incentives to participate, group education classes, restrictive smoking policy and the penalty for not adhering to smoking policy, food labelling in cafeterias and vending machines, healthy food at company meetings and events, allocation of space to exercise equipment, purchase of new exercise equipment and training sessions on using new equipment, measured distance lines on worksites to promote lunch-time walking, individual-level exercise-related interventions.<br>Control intervention: self-help programs on smoking, nutrition and physical activity. | 30   | Fruits, vegetables, total fat, fibre       | 62.0 | 4 |
| Engbers, 2007 <sup>24</sup> | Netherlands                                      | QE  | <ul style="list-style-type: none"> <li>• 540 slightly overweight (BMI <math>\geq 23</math> kg/m<sup>2</sup>) office workers</li> <li>• 2 government companies</li> </ul>                                                                                     | Informational sheets in close vicinity to food products in worksite canteen, informational sheets on the vending machine, brochures and leaflets on healthy lifestyle, healthy food buffet, point-of-decision prompts on elevator doors at ground floor to promote stair use, footsteps printed on the floor leading from building entrances to staircases, placement of motivational texts and exercise-related facts in windows between floors, placement of slim-making big mirrors on every other floor in the staircases.                                                                                                                                                                                                                                                                                 | 12   | BMI, WC, SBP, DBP, T-Cho, HDL, LDL,        | 16.3 | 3 |
| Engbers, 2006 <sup>25</sup> | Netherlands                                      | QE  | <ul style="list-style-type: none"> <li>• 515 office workers with BMI <math>\leq 23</math> kg/m<sup>2</sup></li> <li>• 2 government companies</li> </ul>                                                                                                      | Same as Engbers, 2007.                                                                                                                                                                                                                                                                                                                                                                                                                                                                                                                                                                                                                                                                                                                                                                                         | 12   | Fruits, vegetables, total fat              | 16.1 | 3 |
| Eshah, 2010 <sup>26</sup>   | Jordan                                           | RCT | <ul style="list-style-type: none"> <li>• 123 school teachers</li> <li>• 6 secondary schools</li> </ul>                                                                                                                                                       | Group education, individual counselling and behavioural counselling on health responsibility, physical activity, nutrition, spiritual growth, interpersonal relationships and stress management, healthy lifestyle pamphlet.                                                                                                                                                                                                                                                                                                                                                                                                                                                                                                                                                                                   | 0.5* | Not available <sup>††</sup>                | 13.8 | 3 |

|                                |                                  |     |                                                                                                                                     |                                                                                                                                                                                                                                                                                                                                                                                                                                                                                                                                                                                                                                                                                                                                                                                                                                                                                                                                                                                                         |        |                                             |              |   |
|--------------------------------|----------------------------------|-----|-------------------------------------------------------------------------------------------------------------------------------------|---------------------------------------------------------------------------------------------------------------------------------------------------------------------------------------------------------------------------------------------------------------------------------------------------------------------------------------------------------------------------------------------------------------------------------------------------------------------------------------------------------------------------------------------------------------------------------------------------------------------------------------------------------------------------------------------------------------------------------------------------------------------------------------------------------------------------------------------------------------------------------------------------------------------------------------------------------------------------------------------------------|--------|---------------------------------------------|--------------|---|
| Faghri, 2014 <sup>27</sup>     | USA                              | RCT | <ul style="list-style-type: none"> <li>• 19 employees</li> <li>• Two long term care nursing facilities</li> </ul>                   | <p>Intervention I: individual weight loss consultation, food and exercise logs, weekly weight goals with financial incentives for meeting goals.</p> <p>Intervention II: individual weight loss consultation, food and exercise logs, weekly weight goals.</p>                                                                                                                                                                                                                                                                                                                                                                                                                                                                                                                                                                                                                                                                                                                                          | 4      | BMI, DBP, SBP, WHR, weight                  | Not reported | 3 |
| Fernandez, 2015 <sup>28</sup>  | Northeastern USA                 | RCT | <ul style="list-style-type: none"> <li>• 2615 employees</li> <li>• 10 manufacturing, research, and development companies</li> </ul> | <p>Employee advisory board, awareness workshops and brochures on nutrition and physical activity, newsletters, wellness books, nutrition promotion signs, taste tests, point-of-choice labelling on vending machines, free healthy foods, the inclusion of healthy foods options in vending machines, chef training workshops on healthy meal preparation, a price reduction of healthy foods in cafeterias and vending machines, website with wellness information, walking route maps, a member's forum and a chat session with a dietician, bioimpedance scale for self-monitoring, health and wellness fairs on diet and nutrition, obesity, stress, cardiovascular disease, smoking risks and physical activity, free gym membership, improved fitness facilities, treadmill and elliptical machines, orientations at worksite gyms, mapping of indoor and outdoor walking routes, outdoor power walks, signs promoting stairway use, team fitness competitions, pedometers, farmer's markets.</p> | 36     | BMI                                         | N/A‡         | 4 |
| Fitzgerald, 2019 <sup>29</sup> | Cork, Ireland                    | RCT | <ul style="list-style-type: none"> <li>• 850 employees across four large multinational workplaces</li> </ul>                        | <p>4-arm intervention, including control, education, environment and a combined arm. Education arm comprised three components: detailed nutrition information, such as daily calorie and traffic light menu labelling, posters, leaflets and emails; individual nutrition counselling; and monthly group presentations.</p> <p>Environment arm comprised five components: menu modification (restriction of fat, saturated fat, sugar and salt); increase in fibre, fruit and vegetables; price discounts for whole fresh fruits; strategic positioning of healthier alternative; and portion size control.</p> <p>Combined arms include previous components from the education and environmental arms.</p>                                                                                                                                                                                                                                                                                             | 9      | Fibre                                       | 38.9         | 3 |
| Flannery, 2012 <sup>30</sup>   | Maryland, USA                    | RCT | <ul style="list-style-type: none"> <li>• 39 female minority nursing assistants</li> <li>• 2 long-term care facilities</li> </ul>    | <p>Group education session on physical activity and diet, self-efficacy group discussions, competitions, daily health tips, nurse resource for physical activity and diet questions, food label reading practice, individualized recipe/cooking instruction, taste tests, physical activity breaks, group exercise classes, goal setting, pedometers, individualized progress reports, nonmonetary incentives for winning competitions and meeting program goals, intervention website, free gym membership, training of peer leaders.</p> <p>Control intervention: group education session on physical activity and diet.</p>                                                                                                                                                                                                                                                                                                                                                                          | 3*     | BMI, SBP, DBP, T-Cho, HDL, LDL, TG          | 28.2         | 4 |
| French, 2010 <sup>31</sup>     | Minneapolis, USA                 | RCT | <ul style="list-style-type: none"> <li>• 1063 transit workers</li> <li>• 4 garages</li> </ul>                                       | <p>Garage advisory board increased availability and lowered the price of healthful foods and beverages in vending machines, food labelling in vending machines, improved worksite fitness facilities, weight loss contest with incentive prizes, team walking competitions, fruit and vegetable intake challenges, fitness classes with individualized instruction, 1-Day promotional health and fitness exposition, farmer's markets held at worksites, peer-mentoring program.</p>                                                                                                                                                                                                                                                                                                                                                                                                                                                                                                                    | 18     | Fruits, vegetables, BMI, weight             | N/A‡         | 3 |
| Furuki, 1999 <sup>32</sup>     | Northern Kyoto Prefecture, Japan | QE  | <ul style="list-style-type: none"> <li>• 1014 employees</li> <li>• Automobile parts manufacturer</li> </ul>                         | <p>Health checkups, health guidance, physical exercise clubs.</p>                                                                                                                                                                                                                                                                                                                                                                                                                                                                                                                                                                                                                                                                                                                                                                                                                                                                                                                                       | 48     | BMI, SBP, DBP, T-Cho, HDL                   | Not reported | 1 |
| Geaney, 2016 <sup>33</sup>     | Ireland                          | RCT | <ul style="list-style-type: none"> <li>• 850 employees</li> <li>• 4 manufacturing worksites in Ireland</li> </ul>                   | <p>Intervention I: Group nutrition presentations, individual consultations, and detailed nutrition information.</p> <p>Intervention II: Group nutrition presentations, individual consultations, detailed nutrition information, environmental modifications including menu modification in</p>                                                                                                                                                                                                                                                                                                                                                                                                                                                                                                                                                                                                                                                                                                         | 7 to 9 | BMI, DBP, SBP, fibre, total fat, WC, weight | 30.7         | 3 |



|                              |                                                  |     |                                                                                                                                |                                                                                                                                                                                                                                                                                                                                                                                                                                                                                                                                                                                                                                                                                                                                      |       |                                                                     |       |   |  |
|------------------------------|--------------------------------------------------|-----|--------------------------------------------------------------------------------------------------------------------------------|--------------------------------------------------------------------------------------------------------------------------------------------------------------------------------------------------------------------------------------------------------------------------------------------------------------------------------------------------------------------------------------------------------------------------------------------------------------------------------------------------------------------------------------------------------------------------------------------------------------------------------------------------------------------------------------------------------------------------------------|-------|---------------------------------------------------------------------|-------|---|--|
|                              |                                                  |     |                                                                                                                                | the cafeteria, discounted prices on fruit, strategic positioning of healthier options, and portion size control.<br>Intervention III: Environmental modifications including menu modification in the cafeteria, discounted prices on fruit, strategic positioning of healthier options, and portion size control.                                                                                                                                                                                                                                                                                                                                                                                                                    |       |                                                                     |       |   |  |
| Gerstel, 2013 <sup>34</sup>  | Geneva, Switzerland                              | QE  | <ul style="list-style-type: none"> <li>• 173 home-care providers</li> <li>• State-funded home-care nursing facility</li> </ul> | Free bicycles provided to home-care providers to encourage active transportation to patients' homes, cognitive behavioural education program on physical exercise and nutrition.                                                                                                                                                                                                                                                                                                                                                                                                                                                                                                                                                     | 12    | Total fat, BMI, weight, body fat %, WC, SBP, DBP, HDL, LDL, TG, FPG | 26.6  | 3 |  |
| Glasgow, 1997 <sup>35</sup>  | Oregon, USA                                      | QE  | <ul style="list-style-type: none"> <li>• 2502 employees</li> <li>• 22 manufacturing/sales or government worksites</li> </ul>   | The employee steering committee, nonmonetary participation incentives (coffee mugs, water bottles, lunch bags, T-shirts, hats, key chains), carbon monoxide feedback for smokers, weight-loss contests, self-help behaviour change materials, taste tests, food label reading demonstrations, smoking/cholesterol education, vending machine and cafeteria menu changes, networking to community organizations, review of worksite tobacco use policies.                                                                                                                                                                                                                                                                             | 19*   | Total fat, T-Cho                                                    | 57.4† | 3 |  |
| Glasgow, 1995 <sup>36</sup>  | Oregon, USA                                      | RCT | <ul style="list-style-type: none"> <li>• 2791 employees</li> <li>• 26 manufacturing/sales or government worksites</li> </ul>   | Same as Glasgow, 1997.                                                                                                                                                                                                                                                                                                                                                                                                                                                                                                                                                                                                                                                                                                               | 19*   | Total fat, T-Cho                                                    | 56.2† | 4 |  |
| Goetzel, 2010 <sup>37</sup>  | Texas, Louisiana, West Virginia, New Jersey, USA | QE  | <ul style="list-style-type: none"> <li>• 3504 employees</li> <li>• 12 Dow Chemical Company worksites</li> </ul>                | Intervention I: High-intensity intervention: moderate-intensity intervention + management training on health-related topics, additionally of health objectives to management goals.<br>Intervention II: Moderate intensity intervention: environmental prompts and point-of-choice messages in front of stairwells, vending machines and cafeterias encouraging physical activity and healthy food choices, modifications to vending machine items and cafeteria menus, creation and marking of walking pathways, online weight tracking program, pedometers, wellness ambassadors, employee recognition program, health promotion and risk education program.<br>Control intervention: health promotion and risk education program. | 24    | BMI, weight, SBP, DBP, T-Cho, FPG                                   | 56.6  | 3 |  |
| Gomel, 1997 <sup>38</sup>    | Sydney, Australia                                | RCT | <ul style="list-style-type: none"> <li>• 431 employees</li> <li>• 28 ambulance stations</li> </ul>                             | Intervention 1: CVD risk factor screening and feedback, risk factor education.<br>Intervention 2: Intervention 1 + behavioural counselling sessions, self-instruction lifestyle change manual.<br>Intervention 3: Intervention 2 + goal setting, financial incentives for healthy lifestyle changes.<br>Control intervention: CVD risk factor screening and feedback.                                                                                                                                                                                                                                                                                                                                                                | 6*    | Not available††                                                     | 16.0  | 5 |  |
| Gomel, 1993 <sup>39</sup>    |                                                  | RCT | <ul style="list-style-type: none"> <li>• Same as Gomel, 1997</li> </ul>                                                        | Same as Gomel, 1997.                                                                                                                                                                                                                                                                                                                                                                                                                                                                                                                                                                                                                                                                                                                 | 6*    | Not available††                                                     | 16.0  | 5 |  |
| Gosliner, 2010 <sup>40</sup> | Contra Costa County, California, USA             | QE  | <ul style="list-style-type: none"> <li>• 124 employees</li> <li>• 13 childcare centers</li> </ul>                              | Wellness training focused on nutrition and physical activity, individual health consultations, monthly newsletters, paycheck stuffers, walking program.                                                                                                                                                                                                                                                                                                                                                                                                                                                                                                                                                                              | 10    | Fruits, vegetables                                                  | 33.9  | 3 |  |
| Guldan, 1992 <sup>41</sup>   | Chengdu, Sichuan, China                          | QE  | <ul style="list-style-type: none"> <li>• 236 employees</li> <li>• 2 divisions of a steel tube factory</li> </ul>               | Nutrition education classes, Chinese dietary guidelines handout.                                                                                                                                                                                                                                                                                                                                                                                                                                                                                                                                                                                                                                                                     | 1.25* | Not available††                                                     | N/A‡  | 2 |  |
| Gysan, 2017 <sup>42</sup>    | Cologne, Germany                                 | RCT | <ul style="list-style-type: none"> <li>• 447 employees</li> <li>• Ford Company</li> </ul>                                      | Multimodal outpatient intervention program developed, implemented and supervised by the health care specialists. The program promoted healthy lifestyle patterns in subjects at high cardiovascular risk given in small groups twice a week.<br>Comparison group: received the usual care from their general practitioners.                                                                                                                                                                                                                                                                                                                                                                                                          | 3*    | Weight, BMI, SBP, DBP, T-Cho, LDL                                   | 23    | 4 |  |

|                                |                                             |     |                                                                                                                                                                                                                                                                |                                                                                                                                                                                                                                                                                                                                                                                                                                                                                                                                                                                                                                                                                                                                                                                                                                                                                                                                                                                                                                                                                                                                                                                                                           |    |                                                                 |              |   |
|--------------------------------|---------------------------------------------|-----|----------------------------------------------------------------------------------------------------------------------------------------------------------------------------------------------------------------------------------------------------------------|---------------------------------------------------------------------------------------------------------------------------------------------------------------------------------------------------------------------------------------------------------------------------------------------------------------------------------------------------------------------------------------------------------------------------------------------------------------------------------------------------------------------------------------------------------------------------------------------------------------------------------------------------------------------------------------------------------------------------------------------------------------------------------------------------------------------------------------------------------------------------------------------------------------------------------------------------------------------------------------------------------------------------------------------------------------------------------------------------------------------------------------------------------------------------------------------------------------------------|----|-----------------------------------------------------------------|--------------|---|
| Hebert, 1993 <sup>43</sup>     | Rhode Island and central Massachusetts, USA | RCT | <ul style="list-style-type: none"> <li>• 3076 employees</li> <li>• 16 life insurance sales, health care delivery, computer manufacturing and sales, wholesale food sales, telecommunications, construction and manufacturing worksites<sup>43</sup></li> </ul> | Employee advisory board, diet education classes, dietary self-assessment, diet and physical activity monitoring, diet and physical activity goal-setting, weight management course, cancer risk factor presentation, cholesterol screening, counselling and referrals, educational materials for healthful meal preparation, taste tests, nonmonetary incentives, healthier cafeteria food choices, cafeteria point-of-choice labelling, eating pattern guidelines.                                                                                                                                                                                                                                                                                                                                                                                                                                                                                                                                                                                                                                                                                                                                                       | 15 | SFA, PUFA                                                       | 42.7         | 5 |
| Hossain, 2019 <sup>44</sup>    | Bangladesh                                  | RCT | <ul style="list-style-type: none"> <li>• 1310 Female employees</li> <li>• 4 factories from Readymade garment (RMG)</li> </ul>                                                                                                                                  | <p>4 arms study</p> <p>Group A intervention: Factory provided lunch meals enhanced with micronutrient fortified rice, and animal sources foods, iron and folic acid supplements once a week, behaviour change communication activities including anaemia, nutrition and dietary diversity, infant and young child nutrition + breastfeeding.</p> <p>Group B control: factory provided usual lunch, behaviour change communication activities included eating healthy, maternal health, reproductive health and family planning, sexually transmitted infections, Malaria and Dengue, personal hygiene, serious illness reproductive cancer, Waterborne disease, and menstruation.</p> <p>Group C intervention: iron and folic acid supplements twice a week and behaviour change communication activities including anaemia, nutrition and dietary diversity, infant and young child nutrition + breastfeeding.</p> <p>Group D control: behaviour change communication activities included eating healthy, maternal health, reproductive health and family planning, sexually transmitted infections, Malaria and Dengue, personal hygiene, serious illness reproductive cancer, Waterborne disease, and menstruation</p> | 10 | weight                                                          | 3.1*****     | 2 |
| Hunt, 1993 <sup>45</sup>       | Rhode Island and central Massachusetts, USA | RCT | <ul style="list-style-type: none"> <li>• 2365 employees</li> <li>• 16 life insurance sales, health care delivery, computer manufacturing and sales, wholesale food sales, telecommunications, construction, and manufacturing worksites</li> </ul>             | Employee advisory board, nutrition and weight management programs inclusive of group discussions and goal setting, American Cancer Society presentation, point-of-purchase labelling in cafeterias, cholesterol screening and education, taste tests, food demonstrations, summer barbecue, education materials.                                                                                                                                                                                                                                                                                                                                                                                                                                                                                                                                                                                                                                                                                                                                                                                                                                                                                                          | 15 | Fruits, vegetables                                              | 26.0         | 4 |
| Hutchinson, 2013 <sup>46</sup> | Australia                                   | RCT | <ul style="list-style-type: none"> <li>• 55 employees</li> <li>• 3 worksites of a utility company</li> </ul>                                                                                                                                                   | Delivery of free fruit to the workplace every morning, encouragement by peer educators to consume fruit.                                                                                                                                                                                                                                                                                                                                                                                                                                                                                                                                                                                                                                                                                                                                                                                                                                                                                                                                                                                                                                                                                                                  | 1  | Fruits                                                          | 43.6         | 2 |
| Iriyama, 2016 <sup>47</sup>    | Japan                                       | RCT | <ul style="list-style-type: none"> <li>• 57 employees</li> <li>• 5 worksites, Niigata</li> </ul>                                                                                                                                                               | Group nutrition and exercise education, individual nutrition counselling, goal setting, healthy menus in worksite cafeteria, weekly nutrition messaging in the cafeteria.                                                                                                                                                                                                                                                                                                                                                                                                                                                                                                                                                                                                                                                                                                                                                                                                                                                                                                                                                                                                                                                 | 6  | BMI, WC, weight                                                 | 17.7         | 4 |
| Jaime, 2014 <sup>48</sup>      | Brazil                                      | RCT | <ul style="list-style-type: none"> <li>• 281 employees</li> <li>• 4 companies, Sao Paulo</li> </ul>                                                                                                                                                            | Interactive software for self-monitoring of weight and automated emails.                                                                                                                                                                                                                                                                                                                                                                                                                                                                                                                                                                                                                                                                                                                                                                                                                                                                                                                                                                                                                                                                                                                                                  | 12 | BMI, WC, weight                                                 | 61.0         | 4 |
| Jamal, 2016 <sup>49</sup>      | Kuala Lumpur, Malaysia                      | RCT | <ul style="list-style-type: none"> <li>• 194 employees</li> <li>• Public University in Kuala Lumpur</li> </ul>                                                                                                                                                 | <p>Group support lifestyle modification program (GSLiM) that included bi-weekly seminar sessions of diet and healthy eating, physical activity to enhance weight loss and a healthy lifestyle.</p> <p>Comparison group: was given individual dietary counselling for 1 hour once in 12 weeks.</p>                                                                                                                                                                                                                                                                                                                                                                                                                                                                                                                                                                                                                                                                                                                                                                                                                                                                                                                         | 6* | Weight, BMI, WC, SBP, DBP, TG, T-Chol, HDL, LDL, FPG, total fat | 22           | 4 |
| Jeffery, 1993 <sup>50</sup>    | Minneapolis/St. Paul metropolitan           | RCT | <ul style="list-style-type: none"> <li>• 5888 employees</li> <li>• 32 insurance, primary health care, financial services,</li> </ul>                                                                                                                           | Weight loss and smoking cessation classes, goal setting, financial incentives for weight loss and smoking cessation.                                                                                                                                                                                                                                                                                                                                                                                                                                                                                                                                                                                                                                                                                                                                                                                                                                                                                                                                                                                                                                                                                                      | 24 | BMI                                                             | Not reported | 3 |

|                                          |                                  |     |                                                                                                                                                                                                             |                                                                                                                                                                                                                                                                                                                                                                                                                                                                                                                                                        |      |                                                        |      |   |  |
|------------------------------------------|----------------------------------|-----|-------------------------------------------------------------------------------------------------------------------------------------------------------------------------------------------------------------|--------------------------------------------------------------------------------------------------------------------------------------------------------------------------------------------------------------------------------------------------------------------------------------------------------------------------------------------------------------------------------------------------------------------------------------------------------------------------------------------------------------------------------------------------------|------|--------------------------------------------------------|------|---|--|
|                                          | area, Minnesota, USA             |     | manufacturing, education, electronic assembly, bulk mail distribution, research and development, and government worksites                                                                                   |                                                                                                                                                                                                                                                                                                                                                                                                                                                                                                                                                        |      |                                                        |      |   |  |
| Johanning, 1996 <sup>51</sup>            | Germany                          | QE  | <ul style="list-style-type: none"> <li>• 125 transit operators</li> <li>• Munich Metropolitan System (MVV)</li> </ul>                                                                                       | Diet counselling, group physical activity, back school, education on relaxation techniques and conflict management.                                                                                                                                                                                                                                                                                                                                                                                                                                    | 12   | BMI, weight, SBP, DBP, T-Cho, HDL, LDL, TG             | 21.6 | 4 |  |
| Kamioka, 2009 <sup>52</sup>              | Unnan, Shimane Prefecture, Japan | RCT | <ul style="list-style-type: none"> <li>• 43 male, white-collar employees</li> <li>• Municipal office</li> </ul>                                                                                             | Lectures on lifestyle, diet and physical exercise, exercise sessions, hot spa bathing, newsletters on eating, sleeping, exercising and bathing, individualized programs with targets set by participants, instructions on daily living. Control intervention: general health guidance.                                                                                                                                                                                                                                                                 | 6*   | BMI, weight, body fat %, WC, T-Cho, HDL, LDL, TG, FPG  | 0    | 4 |  |
| Kouwenhoven-Pasmooij, 2018 <sup>53</sup> | Netherlands                      | RCT | <ul style="list-style-type: none"> <li>• 491 participants</li> <li>• 18 organizational units within three large organizations: military, police, academic hospital</li> </ul>                               | Seven individual coaching sessions with an occupational health physician, personalized suggestions for health promotion based on their Health Risk Assessment, and motivational paragraph in the newsletter. Comparison group: A web-based Health Risk Assessment and personalized feedback and an electronic newsletter providing information on healthy lifestyle.                                                                                                                                                                                   | 12   | BMI, weight                                            | 34   | 4 |  |
| Kuehl, 2014 <sup>54</sup>                | Oregon/southwest Washington, USA | RCT | <ul style="list-style-type: none"> <li>• 408 employees</li> <li>• 1 police and 2 sheriff's departments</li> </ul>                                                                                           | Teams with a designated team leader, 12-week team lead curriculum with activities about healthy eating, exercise, body weight, stress, sleep deprivation, and other lifestyle factors. Emphasis on team social support, team check-ins and weekly goals.                                                                                                                                                                                                                                                                                               | 3*   | Fruits, fruits & vegetables, vegetables, total fat     | 13.7 | 4 |  |
| Kushida, 2014 <sup>55</sup>              | Japan                            | QE  | <ul style="list-style-type: none"> <li>• 349 employees</li> <li>• 16 worksites, Niigata</li> </ul>                                                                                                          | Informational table tents in worksite cafeterias, posters in cafeterias promoting local foods, personalized feedback at one month after baseline.                                                                                                                                                                                                                                                                                                                                                                                                      | 6    | Vegetables                                             | 17.5 | 3 |  |
| Kwak, 2010 <sup>56</sup>                 | Netherlands                      | QE  | <ul style="list-style-type: none"> <li>• 553 employees</li> <li>• 12 worksites: two hospitals, two local governments, 5 factories, energy supplying company, water-supplying company, university</li> </ul> | Expert monitoring and evaluation of body composition measures, pedometers, waist circumference measuring tapes, calorie guide, physical activity and food intake diaries, a log of steps walked, program website with personalized advice on weight maintenance, CD-ROMs on weight status and energy balance-related behaviours, employee advisory board, changes to the assortment of cafeteria foods, workshops, information wall on food intake and physical activity, posters and prompts stimulating stair use, lunch-walking and cycling groups. | 24** | BMI, weight, WC                                        | 27.7 | 3 |  |
| Kwak, 2009 <sup>57</sup>                 | Netherlands                      | QE  | <ul style="list-style-type: none"> <li>• 489 employees</li> <li>• 12 worksites: two hospitals, two local governments, 5 factories, energy supplying company, water-supplying company, university</li> </ul> | Same as Kwak, 2010.                                                                                                                                                                                                                                                                                                                                                                                                                                                                                                                                    | 24   | Not available <sup>††</sup>                            | 41.7 | 3 |  |
| LaCaille, 2016 <sup>58</sup>             | USA                              | QE  | <ul style="list-style-type: none"> <li>• 524 employees</li> <li>• 6 primary care clinics and 1 hospital in Midwest</li> </ul>                                                                               | Traffic light labelling in cafeterias, serving size changes, reduced pricing for smaller portions, making healthy food more visible, pedometer, environmental signage encouraging stair use, etc., training trained influential employees to promote healthy behaviours with their colleagues.                                                                                                                                                                                                                                                         | 12   | BMI, fibre, fruits & vegetables, total fat, WC, weight | 33.1 | 3 |  |
| Lassen, 2011 <sup>59</sup>               | Denmark                          | RCT | <ul style="list-style-type: none"> <li>• 206 employees</li> <li>• 8 worksites: four production units, two zoological gardens, two transport companies</li> </ul>                                            | Employee advisory group, healthy cafeteria choices, reduced soda and candy sales, free fruit, free cold water, healthy lunchtime clubs, food workshops, taste demonstrations, nutrition quizzes, dinner mats, computer-based activities, leaflets, news magazine, network and education opportunities for cafeteria staff. Control Intervention: magazine, free fruit.                                                                                                                                                                                 | 6    | Fruits, vegetables, total fat, fibre, SFA              | 18.4 | 4 |  |

|                                      |                                               |     |                                                                                                                                                                                                                                                                                      |                                                                                                                                                                                                                                                                                                                                                                                                                                                                                                                                                                                                                                                                                                                                                                                                                                                                                           |    |                                                          |      |   |
|--------------------------------------|-----------------------------------------------|-----|--------------------------------------------------------------------------------------------------------------------------------------------------------------------------------------------------------------------------------------------------------------------------------------|-------------------------------------------------------------------------------------------------------------------------------------------------------------------------------------------------------------------------------------------------------------------------------------------------------------------------------------------------------------------------------------------------------------------------------------------------------------------------------------------------------------------------------------------------------------------------------------------------------------------------------------------------------------------------------------------------------------------------------------------------------------------------------------------------------------------------------------------------------------------------------------------|----|----------------------------------------------------------|------|---|
| Lemon, 2014 <sup>60</sup>            | Central Massachusetts, USA                    | RCT | <ul style="list-style-type: none"> <li>• 782 employees</li> <li>• 12 public high schools</li> </ul>                                                                                                                                                                                  | Employee advisory group, healthy lunch options, elimination of sugar-sweetened beverages in faculty lounges, point-of-purchase nutritional information in cafeterias, healthy potluck lunches and breakfasts, access to onsite fitness facilities and locker rooms, walking groups, physical activity campaigns and challenges, group fitness classes, staff basketball games, health promotion displays, healthy food tastings, weight loss and weight maintenance challenges, self-weighing programs, employee resource book and other educational materials on healthy eating, physical activity and weight management, healthy recipes, walking maps, newsletters, project website. Comparison group: employee resource book and other educational materials on healthy eating, physical activity and weight management, healthy recipes, walking maps, newsletters, project website. | 24 | BMI, weight                                              | 18.2 | 4 |
| Lemon, 2010 <sup>61</sup>            | Central Massachusetts, USA                    | RCT | <ul style="list-style-type: none"> <li>• 806 employees</li> <li>• 6 hospitals</li> </ul>                                                                                                                                                                                             | Employee advisory committee, a social marketing campaign with newsletters, displays, program website and information centre with print materials, stairway signs to promote use, walking routes and maps, walking groups, workshops on strength training, cafeteria signs promoting healthy eating, food labelling, healthy cafeteria menu options, farmers' markets, recipe books, campaigns and challenges with prizes for physical activity, healthy eating and weight maintenance.                                                                                                                                                                                                                                                                                                                                                                                                    | 24 | BMI                                                      | 19.6 | 4 |
| Limaye, 2017 <sup>62</sup>           | Pune, India                                   | RCT | <ul style="list-style-type: none"> <li>• 265 employees with <math>\geq 3</math> risk factors (family history of CMD, overweight/obesity, high BP, TG, LDL, TC, low HDL, IFG)</li> <li>• 2 multinational IT industries</li> </ul>                                                     | Information on lifestyle modification through mobile phone messages and emails, infographics, additional support through the website and a Facebook page (closed group). All participants including the control group attended a 1-hour group session on lifestyle modification.                                                                                                                                                                                                                                                                                                                                                                                                                                                                                                                                                                                                          | 12 | Weight, BMI, WC, SBP, DBP, FPG, TG, T-Cho, LDL, HDL      | 23.3 | 3 |
| Lin, 2017 <sup>63</sup>              | Taiwan, China                                 | QE  | <ul style="list-style-type: none"> <li>• 101 employees</li> <li>• 2 office worksites</li> </ul>                                                                                                                                                                                      | Monthly newsletters about the benefits of physical activity, health risks of sitting and recommendations on physical activity, and health, motivation tools, pedometer challenges, environmental prompts, and walking routes. Comparison group: received monthly newsletters.                                                                                                                                                                                                                                                                                                                                                                                                                                                                                                                                                                                                             | 3  | Weight, WC, SBP, DBP, FPG, TG, T-Cho, HDL, LDL           | 2    | 3 |
| Lin, 2018 <sup>64</sup>              | Taiwan, China                                 | QE  | <ul style="list-style-type: none"> <li>• 904 employees with BMI <math>\geq 26</math></li> <li>• 14 factories in semiconductor industry</li> </ul>                                                                                                                                    | Exercise arm: 10,000 paces per day recorded by a pedometer. Diet-plus-exercise arm: in addition to 10,000 paces per day, diet logs and face-to-face counselling biweekly by a nutritionist.                                                                                                                                                                                                                                                                                                                                                                                                                                                                                                                                                                                                                                                                                               | 3  | Body weight, BMI, WC, SBP, DBP, T-Cho, HDL, LDL, TG, FPG | NA   | 1 |
| Linde, 2012 <sup>65</sup>            | Twin Cities metropolitan area, Minnesota, USA | RCT | <ul style="list-style-type: none"> <li>• 1747 employees</li> <li>• 6 worksites: two community colleges, regional insurance office, beauty industry corporate headquarters, utility company home office, national headquarters for a health-related nonprofit organization</li> </ul> | Increased availability of calorie smart foods and smaller portion sizes in cafeterias and vending machines, a reduced price of calorie smart food, increased price of non-calorie smart food, point-of-choice labelling, table tents, posters, group walks, walking challenges, activity monitoring, pedometers, motivational signs and music in stairwells to promote use, balance beam scales, BMI charts, weight tracking forms, weight maintenance competitions, newsletters, employee advisory panel.                                                                                                                                                                                                                                                                                                                                                                                | 24 | BMI                                                      | 24.3 | 4 |
| Lindquist, 1999 <sup>66</sup>        | Australia                                     | RCT | <ul style="list-style-type: none"> <li>• 104 employees with identified stress-related symptoms</li> <li>• Government tax office</li> </ul>                                                                                                                                           | Workshops on stress, healthy lifestyle and stress-coping skills, handouts on workshop topics, homework booklet with assignments, recommended reading list, individual counselling with feedback on baseline stress assessment, personalized action plan, phone calls to encourage action plan maintenance.                                                                                                                                                                                                                                                                                                                                                                                                                                                                                                                                                                                | 2  | SBP, DBP                                                 | 0    | 3 |
| Mache, 2015 <sup>67,68***</sup><br>* | Germany                                       | QE  | <ul style="list-style-type: none"> <li>• 3095 employees</li> <li>• Two worksites</li> </ul>                                                                                                                                                                                          | Group health promotion education, individual coaching on nutrition and physical activity, cooking lessons, goal setting, free fruits and vegetables during education sessions, onsite exercise.                                                                                                                                                                                                                                                                                                                                                                                                                                                                                                                                                                                                                                                                                           | 12 | BMI, weight                                              | 61.4 | 2 |

|                            |                        |     |                                                                                                                                                                                                                                                                                               |                                                                                                                                                                                                                                                                                                                                                                                                                                                                                                                                                                                                                                                                            |    |                                               |              |   |
|----------------------------|------------------------|-----|-----------------------------------------------------------------------------------------------------------------------------------------------------------------------------------------------------------------------------------------------------------------------------------------------|----------------------------------------------------------------------------------------------------------------------------------------------------------------------------------------------------------------------------------------------------------------------------------------------------------------------------------------------------------------------------------------------------------------------------------------------------------------------------------------------------------------------------------------------------------------------------------------------------------------------------------------------------------------------------|----|-----------------------------------------------|--------------|---|
| Maes, 1998 <sup>69</sup>   | Netherlands            | RCT | <ul style="list-style-type: none"> <li>• 346 employees</li> <li>• 3 Brabantia manufacturing workites</li> </ul>                                                                                                                                                                               | Reorganization of the production line to address worksite wellness risks, physical exercise sessions, health education sessions on nutrition, alcohol and drug consumption, working conditions, stress, smoking behaviour, headaches and back pain, employee groups for smoking, headaches and back pain, employee advisory committee, health fair, health exhibition, creation of on-site exercise facilities, cafeteria smoking policy, program advertising via cafeteria information corner, posters, videos, radio messages and newsletters, free healthy food, cafeteria food labelling, social skills and leadership training for management.                        | 36 | Not available <sup>††</sup>                   | 23.7         | 4 |
| Mansi, 2015 <sup>70</sup>  | New Zealand            | RCT | <ul style="list-style-type: none"> <li>• 58 employees</li> <li>• Meat processing facility</li> </ul>                                                                                                                                                                                          | Group education on physical activity, individual physical activity assessment, pedometer challenges, goal setting, and exercise log.                                                                                                                                                                                                                                                                                                                                                                                                                                                                                                                                       | 3  | BMI, body fat %, DBP, SBP, WC, weight         | 8.6          | 4 |
| Meenan, 2010 <sup>71</sup> | Oahu, Hawaii, USA      | RCT | <ul style="list-style-type: none"> <li>• 6958 employees</li> <li>• 30 hotels</li> </ul>                                                                                                                                                                                                       | Weight management groups consisting of goal setting, monitoring of food intake, calories and physical activity, decision training, physical activity sessions, physical activity promotion, dietary education and peer support, additional weight management groups for overweight and obese employees, monthly newsletters, electronic sign messages, healthier cafeteria food options, labelling of healthy cafeteria foods, wellness-themed contests, promotion of stair use, feedback on BMI assessment and lifestyle choices, flyers on good health habits.<br>Control intervention: feedback on BMI assessment and lifestyle choices, flyers on good health habits.  | 24 | BMI                                           | Not reported | 3 |
| Miller, 2016 <sup>72</sup> | USA                    | RCT | <ul style="list-style-type: none"> <li>• 68 employees</li> <li>• University worksite</li> </ul>                                                                                                                                                                                               | Weekly 60 minutes group sessions were facilitated by a lifestyle coach in which participants received a written, annual, food and physical activity trackers, a graph for tracking weekly weights, a booklet with nutrient content. Participants were encouraged to record calories and fat grams consumed and minutes spent in physical activity. The 8 sessions contain information about, modifying energy and fat intake, increasing energy expenditure, achieving lifestyle goals; relapse prevention and motivational factors for sustain behavioural change.<br>Control group: received an information booklet regarding lifestyle changes for diabetes prevention. | 4* | Not available <sup>††</sup>                   | 12.8         | 5 |
| Mills, 2007 <sup>73</sup>  | United Kingdom         | QE  | <ul style="list-style-type: none"> <li>• 2198 office workers</li> <li>• Intervention participants from 3 business units of Unilever PLC: a multinational manufacturer of food, home care and personal care products; control participants from other service delivery corporations</li> </ul> | Personalized health and well-being report, personalized health, well-being and lifestyle web-portal with articles, assessments and interactive online behaviour-change programs, tailored emails on personal wellness topics, newsletters and health promotion literature on stress management, sleep improvement, nutritional balance and physical activity, seminars on wellness issues.                                                                                                                                                                                                                                                                                 | 12 | Not available <sup>††</sup>                   | 31.4         | 3 |
| Morgan, 2011 <sup>74</sup> | Tomago, Australia      | RCT | <ul style="list-style-type: none"> <li>• 110 obese/overweight (BMI 25-40 kg/m<sup>2</sup>), male employees</li> <li>• Tomago Aluminum</li> </ul>                                                                                                                                              | Information session on energy balance, diet and physical activity challenges of shift work and behaviour change strategies, weight loss website inclusive of eating and exercise diaries and weight tracking, individualized dietary feedback and advice emails, weight loss handbook, pedometers, group-based financial incentive for weight loss.                                                                                                                                                                                                                                                                                                                        | 3* | Fruits, vegetables, BMI, weight, WC, SBP, DBP | 19.0         | 4 |
| Moy, 2008 <sup>75</sup>    | Kuala Lumpur, Malaysia | QE  | <ul style="list-style-type: none"> <li>• 186 Malay-Muslim, male security guards</li> <li>• Public university and its teaching hospital</li> </ul>                                                                                                                                             | One-to-one counselling on nutrition, physical activity and CVD risk factors based on health check results, group counselling on smoking cessation, physical activity and stress management, focus group discussions, individualized brochures, self-monitoring booklets, modified recipes, quizzes and small gifts for quiz winners, microwave oven, water cooler and weighing scale placed in office.                                                                                                                                                                                                                                                                     | 24 | Total fat, T-Cho, SFA, PUFA                   | 19.4         | 2 |

|                                 |                                              |     |                                                                                                                                                              |                                                                                                                                                                                                                                                                                                                                                                                                                                                                                                                                                                                                                                                                                                                                                                                                                            |     |                                                 |                   |   |  |
|---------------------------------|----------------------------------------------|-----|--------------------------------------------------------------------------------------------------------------------------------------------------------------|----------------------------------------------------------------------------------------------------------------------------------------------------------------------------------------------------------------------------------------------------------------------------------------------------------------------------------------------------------------------------------------------------------------------------------------------------------------------------------------------------------------------------------------------------------------------------------------------------------------------------------------------------------------------------------------------------------------------------------------------------------------------------------------------------------------------------|-----|-------------------------------------------------|-------------------|---|--|
|                                 |                                              |     |                                                                                                                                                              | Control intervention: feedback on health check results, healthy lifestyle brochures, group sessions.                                                                                                                                                                                                                                                                                                                                                                                                                                                                                                                                                                                                                                                                                                                       |     |                                                 |                   |   |  |
| Moy, 2006 <sup>76</sup>         | Kuala Lumpur, Malaysia                       | QE  | <ul style="list-style-type: none"> <li>• Same as Moy, 2008</li> </ul>                                                                                        | Same as Moy, 2008                                                                                                                                                                                                                                                                                                                                                                                                                                                                                                                                                                                                                                                                                                                                                                                                          | 24  | BMI, SBP, DBP, HDL, LDL, TG, FPG                | 19.4              | 2 |  |
| Olafsdottir, 2012 <sup>77</sup> | Iceland                                      | QE  | <ul style="list-style-type: none"> <li>• 61 fishermen</li> <li>• 7 fish-processing trawlers of one fish company</li> </ul>                                   | Health specialists were available for advice, encouragement, information and recommendations about physical activity and diet, fitness equipment, healthy meal choices during fishing trips.                                                                                                                                                                                                                                                                                                                                                                                                                                                                                                                                                                                                                               | 6   | BMI, weight, WC<br>BP, T-Cho, HDL, LDL, TG, FPG | 0<br>6.6          | 2 |  |
| Ostbye, 2015 <sup>78</sup>      | USA                                          | RCT | <ul style="list-style-type: none"> <li>• 550 employees</li> <li>• Duke University employees</li> </ul>                                                       | Individual counselling with a health coach, frequent health messaging delivered via email or postal mail, optional meetings with a registered dietitian or personal trainer.                                                                                                                                                                                                                                                                                                                                                                                                                                                                                                                                                                                                                                               | 12  | BMI, fruits & vegetables, total fat             | 20.7              | 5 |  |
| Pedersen, 2018 <sup>79</sup>    | Norway                                       | RCT | <ul style="list-style-type: none"> <li>• 202 employees</li> <li>• 6 worksite locations of the Norwegian Post-delivery mail and logistic services.</li> </ul> | The intervention group 6 worksites sessions of group-based intervention elements: two workshops and four physical activity support group meetings. The intervention consisted of three sources of need support: co-workers, a health and exercise advisors and a booklet consisting of reflection tasks.<br>Control group: were encouraged to follow the recommendations they received during the individual health screening.                                                                                                                                                                                                                                                                                                                                                                                             | 5   | WC, LDL, DBP, SBP                               | 22.3              | 4 |  |
| Pegus, 2002 <sup>80</sup>       | Southeastern USA                             | QE  | <ul style="list-style-type: none"> <li>• 633 employees</li> <li>• 2 manufacturing sites</li> </ul>                                                           | Onsite nurse available for CVD risk factor screening feedback, education, flyers and posters focused on diet, physical activity and CVD risk factors, email messages, walking group, construction of the walking track, low-fat lunch options, healthy vending machine options, smoking counselling, incentives for participation (T-shirts, bags, apples).                                                                                                                                                                                                                                                                                                                                                                                                                                                                | 12  | Not available <sup>††</sup>                     | Not reported      | 1 |  |
| Peters, 2018 <sup>81</sup>      | Boston metropolitan area, Massachusetts, USA | RCT | <ul style="list-style-type: none"> <li>• 10 (five matched pairs) commercial construction sites</li> </ul>                                                    | 2 main intervention components: (1) the soft tissue injury prevention program including worksite inspections and feedback, task pre-planning checklists, supervisor training and worker training consisting of an “Ergonomics Toolbox Talk”, and (2) a health weak including health educations through toolbox talks, one-on-one discussions on health (behaviours), free web-based and phone-based health coaching, and for smokers nicotine replacement therapy with two-week supply free of charge.                                                                                                                                                                                                                                                                                                                     | 2*  | Not available <sup>††</sup>                     | 80.6              | 3 |  |
| Prabhakaran, 2009 <sup>82</sup> | India                                        | QE  | <ul style="list-style-type: none"> <li>• 5828 employees</li> <li>• 7 industrial sites</li> </ul>                                                             | Direct one-to-one interactions between trained health project personnel and employees and their families, posters, banners, handouts, booklets and film videos focused on healthy eating, physical activity, tobacco use and body weight, group interactions, healthy displays, motivational sessions, banned use of tobacco and its products onsite, modified cafeteria menus to include salads and fruit desserts and reduce fried items and items high in salt, referrals of participants with CVD risk factors to health care facilities, individual and group counselling sessions on diet, physical activity and tobacco use for high-risk participants.<br>Control intervention: referrals of participants with CVD risk factors to the industry-managed clinic, HIV/AIDS awareness program, banned tobacco onsite. | 48  | Weight, WC, SBP, DBP, T-Cho, HDL, TG, FPG       | 60.0 <sup>†</sup> | 4 |  |
| Racette, 2009 <sup>83</sup>     | St. Louis, Missouri, USA                     | RCT | <ul style="list-style-type: none"> <li>• 151 employees</li> <li>• 2 medical center worksites</li> </ul>                                                      | Employee advisory committee, individualized health assessment results, pedometers, healthy snack cart, Weight Watcher group meetings, group exercise program, lunchtime seminars, newsletters, walking maps, team competitions, participation cards and rewards, registered dietician/exercise specialist available for individual health questions.<br>Control intervention: individualized health assessment results.                                                                                                                                                                                                                                                                                                                                                                                                    | 12  | BMI, weight, SBP, DBP, T-Cho, HDL, TG, FPG      | 18.5              | 3 |  |
| Rameshbabu, 2018 <sup>84</sup>  | USA                                          | RCT | <ul style="list-style-type: none"> <li>• 54 janitorial employees</li> </ul>                                                                                  | A saturated fats information booklet, provision of a food diary allowing daily for daily self-monitoring of saturated fat, the worksheet was developed to record their self-regulation activities.                                                                                                                                                                                                                                                                                                                                                                                                                                                                                                                                                                                                                         | 1.5 | SFA                                             | 0                 | 4 |  |

|                              |                                |     |                                                                                                                            |                                                                                                                                                                                                                                                                                                                                                                                                                                                                                                                                                                                                                                                                                                                                                                                                                                                      |    |                                                       |              |   |  |
|------------------------------|--------------------------------|-----|----------------------------------------------------------------------------------------------------------------------------|------------------------------------------------------------------------------------------------------------------------------------------------------------------------------------------------------------------------------------------------------------------------------------------------------------------------------------------------------------------------------------------------------------------------------------------------------------------------------------------------------------------------------------------------------------------------------------------------------------------------------------------------------------------------------------------------------------------------------------------------------------------------------------------------------------------------------------------------------|----|-------------------------------------------------------|--------------|---|--|
|                              |                                |     | <ul style="list-style-type: none"> <li>Midwest university in the United States</li> </ul>                                  | Comparison group: participants were provided with education regarding saturated fats.                                                                                                                                                                                                                                                                                                                                                                                                                                                                                                                                                                                                                                                                                                                                                                |    |                                                       |              |   |  |
| Raymond, 2019 <sup>85</sup>  | Charlotte, North Carolina, USA | QE  | <ul style="list-style-type: none"> <li>831 employees participated in wellness programs</li> </ul>                          | Face-to-face individual health coaching by a nurse practitioner or physician assistant, monetary incentives based on HbA1c, BP, serum lipoproteins, WC, and tobacco abstinence.                                                                                                                                                                                                                                                                                                                                                                                                                                                                                                                                                                                                                                                                      | 60 | T-Cho, LDL, HDL, TG, BMI, WC                          | 10.0         | 1 |  |
| Reynolds, 1997 <sup>86</sup> | USA                            | QE  | <ul style="list-style-type: none"> <li>351 employees</li> <li>6 telephone company worksites</li> </ul>                     | Results and interpretation of cholesterol screening, self-help booklet to reduce intake of saturated fat and cholesterol, and increase intake of complex carbohydrates.                                                                                                                                                                                                                                                                                                                                                                                                                                                                                                                                                                                                                                                                              | 6  | Fruits, vegetables, T-Cho                             | 35.0         | 4 |  |
| Ribeiro, 2014 <sup>87</sup>  | Brazil                         | RCT | <ul style="list-style-type: none"> <li>100 employees</li> <li>University of Sao Paolo Hospital</li> </ul>                  | Intervention I: Pedometer and exercise log and eight group counselling sessions lasting 60 minutes each, discussing how to increase physical activity and overcome barriers to change.<br>Intervention II: Pedometer and exercise log and three 15-minute individual physical activity education sessions per month and booklet on increasing physical activity.                                                                                                                                                                                                                                                                                                                                                                                                                                                                                     | 3  | WC, weight                                            | 30.5         | 4 |  |
| Robbins, 2006 <sup>88</sup>  | USA                            | QE  | <ul style="list-style-type: none"> <li>124367 active duty Air Force members</li> <li>65 U.S. air force bases</li> </ul>    | U.S. Air Force memorandum describing the problem of elevated body weight, email messages targeting healthy eating and physical activity, workbooks.                                                                                                                                                                                                                                                                                                                                                                                                                                                                                                                                                                                                                                                                                                  | 12 | Weight                                                | 44.8         | 4 |  |
| Rowland, 2018 <sup>89</sup>  | USA                            | RCT | <ul style="list-style-type: none"> <li>50 employees</li> <li>Midwest health system</li> </ul>                              | Participants were privately counselled by a nurse practitioner on the results of their cycle fitness test and given an exercise prescription that included: target, physical activity intensity based on cycle test results, instructions on the rating of perceived exertion scale and encouragement to achieve moderate-intensity physical activity and setting the goal to reach at least 150 minutes of moderate physical activity per week. Additionally, every other week they received a total of six 45 minutes group lunch and learn presentations at the workplace about physical activity health benefits. Comparison group: met every other week for 45-minute group lunch and had presentations for 12 weeks at the workplace in which they received general health information on diet, cancer, screening stress management and sleep. | 3  | FPG, T-Cho, TG, LDL, HDL                              | 20           | 3 |  |
| Rusali, 2018 <sup>90</sup>   | Klang Valley Malaysia          | QE  | <ul style="list-style-type: none"> <li>108 participants</li> <li>3 different office worksites from Klang Valley</li> </ul> | Group 1 (Face-to-face intervention): participants followed a weight reduction program called Slim Shape Module which consisted of sixteen 2-h sessions of talks, demonstrations, interactive activities, hands-on activities and exercise sessions. Sessions were related to dietary aspects and physical activity.<br>Group 2 (Online intervention): Participants received all components of diet, behavioural and physical activity via an online weight reduction program.<br>Control group: participants received educational information about diet, physical activity and behaviour modification for weight reduction in printed booklets.                                                                                                                                                                                                     | 4  | Weight, BMI, body fat %, WC, T-Cho, TG, HDL, LDL, FPG | 40           | 2 |  |
| Ryu, 2017 <sup>91</sup>      | Seoul, South-Korea             | QE  | <ul style="list-style-type: none"> <li>565 office workers employed at a single firm</li> </ul>                             | 3-arm intervention, including a health education group, self-monitoring group, and intensive intervention group<br>Self-monitoring group: health education, and health clinic's U-Health System managed by the occupational health nurse used for voluntarily measuring health indicators and consultations regarding the measurements by the nurse.<br>Intensive intervention group for the employees who had over three MetS indicators: health education, U-health system, group exercise for WC control, daily activity monitoring, health consultation, a round of runs, intensive physical exercise programs, such as core training and cycling exercise in workplace by certified exercise trainer, handheld activity tracker, personal health education and consultation by occupational health nurse from the company.                      | 6  | WC, SBP, DBP, FPG, TG, HDL                            | Not reported | 2 |  |

|                                    |                                        |     |                                                                                                                                                                                           |                                                                                                                                                                                                                                                                                                                                                                                                                                                                                                                                                                                                                                                                                                                                                                                                                |    |                                                               |                  |   |
|------------------------------------|----------------------------------------|-----|-------------------------------------------------------------------------------------------------------------------------------------------------------------------------------------------|----------------------------------------------------------------------------------------------------------------------------------------------------------------------------------------------------------------------------------------------------------------------------------------------------------------------------------------------------------------------------------------------------------------------------------------------------------------------------------------------------------------------------------------------------------------------------------------------------------------------------------------------------------------------------------------------------------------------------------------------------------------------------------------------------------------|----|---------------------------------------------------------------|------------------|---|
| Saleh, 2010 <sup>92</sup>          | Upstate New York, USA                  | QE  | <ul style="list-style-type: none"> <li>• 673 employees</li> <li>• 6 rural employers: nursing home, home health care agency, museum, bank, special education home</li> </ul>               | <p>Health education control group: web-magazine leaflet on health-promoting behaviour, and health education on MetS-related diseases, the impact of chronic stress, obesity, nutrition, exercise, drinking and smoking on MetS.</p> <p>Intervention 1: wellness awareness messages, HRA screening with one-on-one lifestyle coaching, high-risk referrals, high-risk case management.</p> <p>Intervention 2: unspecified wellness awareness messages.</p>                                                                                                                                                                                                                                                                                                                                                      | 48 | Not available <sup>††</sup>                                   | 77.6             | 2 |
| Salindari, 2013 <sup>93</sup>      | Greater Boston, Massachusetts, USA     | RCT | <ul style="list-style-type: none"> <li>• 133 obese/overweight (BMI <math>\geq</math> 25 kg/m<sup>2</sup>) employees</li> <li>• 4 office-based companies</li> </ul>                        | Weight loss program consisting of emails for individual support and group education sessions on dietary intake, health and nutrition education program consisting of newsletters and seminars on cardiovascular health, physical activity and childhood nutrition.                                                                                                                                                                                                                                                                                                                                                                                                                                                                                                                                             | 6  | BMI, weight, SBP, DBP, T-Cho, HDL, LDL, TG, FPG <sup>††</sup> | 120              | 4 |
| Scoggins, 2011 <sup>94</sup>       | King County, Washington, USA           | QE  | <ul style="list-style-type: none"> <li>• 27662 employees</li> </ul>                                                                                                                       | Individualized action plans targeting health risks identified through HRA, lower out-of-pocket insurance as an incentive for participation in individualized action plans, newsletters, program website, wellness poster campaigns, stairwell use promotion, healthy vending machine options, free gym membership, employee garden, exercise events, free produce at worksites.                                                                                                                                                                                                                                                                                                                                                                                                                                | 12 | BMI                                                           | Not reported     | 2 |
| Sforzo, 2012 <sup>95</sup>         | New York City, New York, USA           | RCT | <ul style="list-style-type: none"> <li>• 96 employees</li> <li>• Multinational financial investment corporation</li> </ul>                                                                | <p>Intervention I: Intervention II + educational classes on nutrition, exercise and stress management, healthy cafeteria tour to promote understanding of the food environment and healthy meal choices, healthy cafeteria meals, electronic messages, access to the Mayo Clinic Embody Health portal, interactive website with wellness information, self-quizzes and healthy habits diary, a financial incentive for participation.</p> <p>Intervention II: free gym membership, discount for healthy meal options in the cafeteria.</p>                                                                                                                                                                                                                                                                     | 3  | BMI, weight, body fat %, WHR, SBP, DBP                        | 16.7             | 2 |
| Shimizu, 2004 <sup>96</sup>        | Kyushu, Japan                          | QE  | <ul style="list-style-type: none"> <li>• 875 employees</li> <li>• 2 manufacturing worksites</li> </ul>                                                                                    | Health interview with occupational health nurse, health measuring of circulatory and motion functioning, group education on exercise, nutrition and stress management.                                                                                                                                                                                                                                                                                                                                                                                                                                                                                                                                                                                                                                         | 48 | BMI, SBP, DBP, T-Cho, HDL                                     | 28.1             | 2 |
| Shrivastava, 2017 <sup>97</sup>    | Delhi, India                           | RCT | <ul style="list-style-type: none"> <li>• 310 employees</li> <li>• 4 worksites from the private and public sector from different sites across Delhi and National Capital Region</li> </ul> | <p>Detail sessions on the different topics related to healthy living, diet and physical activity every 15 days for 45-60 minutes. Nutrition topics included healthy eating pattern and food articles, eating outside home, portion control, choice of oils, correct cooking methods, food labels and eating during the traditional festive season. Two physical activity training sessions were given to explain the best practices in physical activity and encourage them to continue physical activity supported by the use of a pedometer. Stress management sessions were also provided.</p> <p>Comparison group: they received general health talk twice in six months.</p>                                                                                                                              | 6  | Weight, BMI, WC, WHR, SBP, DBP, FPG, T-Cho, HDL, LDL, TG      | 13.9             | 3 |
| Siegel, 2010 <sup>98</sup>         | Los Angeles, California, USA           | RCT | <ul style="list-style-type: none"> <li>• 413 employees</li> <li>• 16 public elementary schools</li> </ul>                                                                                 | Worksite wellness committee, healthy snacks at meetings, walking clubs, newsletters, healthy cooking class, training in stress management, CPR and first aid, competition and awarded cash prizes for participation in wellness activities.                                                                                                                                                                                                                                                                                                                                                                                                                                                                                                                                                                    | 24 | Fruits, vegetables, BMI, WHR                                  | N/A <sup>‡</sup> | 4 |
| Smith-McLallen, 2017 <sup>99</sup> | Philadelphia, Pennsylvania region, USA | RCT | <ul style="list-style-type: none"> <li>• 459 members of the Independence Blue Cross Wellness Partner</li> <li>• Companies of 200 or fewer employees</li> </ul>                            | <p>Accelerometer, Walking Works Web site for step logs, flyers and poster, e-mails, between-group walking challenges, twice-monthly feedback on their miles walked and tokens for every 10,000 step, team competition, prizes (such as gym bag, backpacks, cookbooks), worksite-specific walking maps, monthly wellness seminars, including goal setting, barriers, stress reduction and healthy eating habits.</p> <p>Comparison group: were given a tool kit that was free and available to all employer's groups via the Walking Work Web site. It included instructions and resources for administering the program, flyers and posters, email-texts that could be used to encourage and motivate employees and information about the Walking Work Web site and how to have employees log step online.</p> | 9  | Weight, BMI, WHR, SBP, DBP, FPG, T-Cho                        | 67.8             | 3 |



|                                |                                                      |     |                                                                                                                                                                                                                                                                                                                       |                                                                                                                                                                                                                                                                                                                                                                                                                                                                                                                                                                                                                                                                                                                                                                                                                               |        |                                                           |                  |   |
|--------------------------------|------------------------------------------------------|-----|-----------------------------------------------------------------------------------------------------------------------------------------------------------------------------------------------------------------------------------------------------------------------------------------------------------------------|-------------------------------------------------------------------------------------------------------------------------------------------------------------------------------------------------------------------------------------------------------------------------------------------------------------------------------------------------------------------------------------------------------------------------------------------------------------------------------------------------------------------------------------------------------------------------------------------------------------------------------------------------------------------------------------------------------------------------------------------------------------------------------------------------------------------------------|--------|-----------------------------------------------------------|------------------|---|
| Song, 2019 <sup>100</sup>      | Eastern United States                                | RCT | <ul style="list-style-type: none"> <li>• 160 worksites of which 20 were randomly selected as intervention site, 20 as control sites and 120 were secondary controls</li> <li>• 8143 employees randomised to intervention or primary control group</li> <li>• Warehouse retail company, BJ's Wholesale Club</li> </ul> | 8 modules, including a webinar on health and primary care, healthy weight through 4 pillars: nutrition, exercise, stress management and sleep, 20 minutes or more cardiovascular exercise at least 3 days a week, activity log, weight log, weekly coaching with a registered dietician, tips to add physical activity to a daily routine and for substitution options with fewer calories when dining out, activities options for managing stress and losing weight. Monetary incentives (gift cards) for each completed module.                                                                                                                                                                                                                                                                                             | 18     | Fruit and vegetables, T-Cho, HDL, LDL, FPG, SBP, DBP, BMI | 74.6*****<br>*   | 4 |
| Sorensen, 2005 <sup>101</sup>  | Greater Boston metropolitan area, Massachusetts, USA | RCT | <ul style="list-style-type: none"> <li>• 1740 employees</li> <li>• 26 manufacturing industries</li> </ul>                                                                                                                                                                                                             | Employee advisory committee, table-top displays, demonstrations, small-group discussions focused on nutrition, physical activity and occupational health, health fairs with biometric and behavioural self-assessments and feedback, healthy food options at company meetings and events, facilities and signs to promote physical activity, worksite consultation with an industrial hygienist, smoke-free worksite, smoking cessation program.<br>Control intervention: smoking cessation program.                                                                                                                                                                                                                                                                                                                          | 18*    | Not available <sup>††</sup>                               | N/A <sup>‡</sup> | 5 |
| Sorensen, 1999 <sup>102</sup>  | Eastern Massachusetts, USA                           | RCT | <ul style="list-style-type: none"> <li>• 1359 employees</li> <li>• 22 community health centers</li> <li>•</li> </ul>                                                                                                                                                                                                  | Intervention I: employee advisory committee, healthful meal discussion series, nutrition education campaign, healthy recipes, cookbook, increased availability of fruits and vegetables in vending machines, free fruits and vegetables at special occasions and break rooms, point-of-choice labelling of fruits and vegetables, posters, videos, brochures, exposure to national 5-a-Day media campaign and Cancer Information Service Hot Line, general nutrition presentation, and a taste test.<br>Intervention II: intervention 1 + written learn-at-home program, annual family newsletter, annual family festival, mailings of materials to families.<br>Control intervention: exposure to national 5-a-Day media campaign and Cancer Information Service Hot Line, general nutrition presentation, and a taste test. | 19.5*  | Fruits, vegetables                                        | N/A <sup>‡</sup> | 5 |
| Sorensen, 1996 <sup>103</sup>  | USA                                                  | RCT | 114 worksites of 4 study centers: Brown University School of Medicine/Miriam Hospital, Dana Farber Cancer Institute/ University of Massachusetts, University of Florida, MD Anderson Cancer Center <sup>§</sup>                                                                                                       | Employee advisory committee, group education on nutrition and smoking, posters, brochures, self-assessments, self-help materials, contests, smoking policy, change in the cafeteria and vending machine food offerings.<br>Control intervention: summary of baseline results, posters, newsletters.                                                                                                                                                                                                                                                                                                                                                                                                                                                                                                                           | 24*    | Fruits, vegetables, total fat, fibre                      | N/A <sup>‡</sup> | 5 |
| Sorensen, 1992 <sup>104</sup>  | Massachusetts and Rhode Island, USA                  | RCT | <ul style="list-style-type: none"> <li>• 3076 employees</li> <li>• 16 insurance, health care, computer, food wholesaling, telecommunication, shoe manufacturing, construction, manufacturing worksites</li> </ul>                                                                                                     | Same as Hebert, 1993.                                                                                                                                                                                                                                                                                                                                                                                                                                                                                                                                                                                                                                                                                                                                                                                                         | 15     | Total fat, fibre                                          | 34.6             | 5 |
| Steenhuis, 2004 <sup>105</sup> | Netherlands                                          | RCT | <ul style="list-style-type: none"> <li>• 1013 employees</li> <li>• 17 worksites of large Dutch companies and government organizations</li> </ul>                                                                                                                                                                      | Intervention I: Self-help manual focused on eating less fat and more fruits and vegetables, posters, brochures, table tents, worksite newsletter, contest.<br>Intervention II: Intervention 1 + labelling of low-fat products in cafeteria.<br>Intervention III: Intervention 1 + increased availability of low-fat products, fruits and vegetables in the cafeteria.                                                                                                                                                                                                                                                                                                                                                                                                                                                         | 1      | Fruits, vegetables, total fat                             | Not reported     | 3 |
| Stites, 2014 <sup>106</sup>    | USA                                                  | RCT | <ul style="list-style-type: none"> <li>• 28 employees</li> </ul>                                                                                                                                                                                                                                                      | Mindful eating training encouraged to pre-order lunches, financial incentives (vouchers) for healthy lunch.                                                                                                                                                                                                                                                                                                                                                                                                                                                                                                                                                                                                                                                                                                                   | 3 to 4 | Weight                                                    | 6.5              | 3 |

|                                 |                       |     |                                                                                                                                                          |                                                                                                                                                                                                                                                                                                                                                                                                                                                                                                                                                                                                                                                                                                                                                                                                                  |     |                                                         |      |   |  |
|---------------------------------|-----------------------|-----|----------------------------------------------------------------------------------------------------------------------------------------------------------|------------------------------------------------------------------------------------------------------------------------------------------------------------------------------------------------------------------------------------------------------------------------------------------------------------------------------------------------------------------------------------------------------------------------------------------------------------------------------------------------------------------------------------------------------------------------------------------------------------------------------------------------------------------------------------------------------------------------------------------------------------------------------------------------------------------|-----|---------------------------------------------------------|------|---|--|
|                                 |                       |     | <ul style="list-style-type: none"> <li>• Large urban hospital, Philadelphia PA</li> </ul>                                                                |                                                                                                                                                                                                                                                                                                                                                                                                                                                                                                                                                                                                                                                                                                                                                                                                                  |     |                                                         |      |   |  |
| Strijk, 2012 <sup>107</sup>     | Netherlands           | RCT | <ul style="list-style-type: none"> <li>• 730 employees</li> <li>• 2 academic hospitals</li> </ul>                                                        | Vitality Exercise Program, consisting of yoga sessions, workout sessions and unsupervised aerobic exercise sessions, visits with a personalized vitality coach for goal setting and goal feedback, free fruit, written information on healthy lifestyles. Comparison group: written information on healthy lifestyles.                                                                                                                                                                                                                                                                                                                                                                                                                                                                                           | 6   | Fruits                                                  | 21.2 | 4 |  |
| Tan, 2016 <sup>108</sup>        | Singapore             | RCT | <ul style="list-style-type: none"> <li>• 585 female employees</li> <li>• 16 worksites primarily office-based and sedentary in nature</li> </ul>          | Three intensive intervention workshops addressing diet and physical activities, including goal setting, participatory skill-building activities, peer support, problem-solving discussions, food sampling, nutrition label reading, diet log, self-monitoring of physical activity, exercise feedback and cues, short bouts of exercise breaks, exercise CD and a 10-min exercise poster with instructions and illustrations. Comparison group: participants received a resource kit with general print resources on bone health and osteoporosis prevention. They also received information and recommendations about vitamin D.                                                                                                                                                                                | 7   | Not available <sup>††</sup>                             | 16.4 | 4 |  |
| Terry, 2011 <sup>109</sup>      | Northern Midwest, USA | RCT | <ul style="list-style-type: none"> <li>• 429 employees</li> <li>• 2 worksites: integrated health care system, national airline</li> </ul>                | Seminars and interactive educational campaigns on physical activity, nutrition, injury prevention and stress management, improved food service options, maps for walking routes, one-on-one healthy lifestyle coaching with registered dietitians for high-risk participants. Control intervention: education on personal development topics, including time management, dealing with different people and hobbies.                                                                                                                                                                                                                                                                                                                                                                                              | 18* | Not available <sup>††</sup>                             | 45.2 | 4 |  |
| Thompson, 2014 <sup>110</sup>   | USA                   | RCT | <ul style="list-style-type: none"> <li>• 20 overweight/ obese primary care physicians</li> <li>• Mayo Clinic Rochester Department of Medicine</li> </ul> | Treadmill desks, weekly 20-minute counselling sessions about increasing physical activity, accelerometer with visual feedback on activity level.                                                                                                                                                                                                                                                                                                                                                                                                                                                                                                                                                                                                                                                                 | 3   | Body fat, FPG, HDL, lean body mass, TG, weight          | 15.0 | 3 |  |
| Tucker, 2016 <sup>111</sup>     | USA                   | RCT | <ul style="list-style-type: none"> <li>• 40 employees (RNs &amp; MAs)</li> <li>• Two clinics at University of Iowa Hospital</li> </ul>                   | Treadmill desks, Wii video game system in the break room, video clips to promote short burst of physical activity, stair climbing and walking meetings with colleagues, mobile health coaching via text messaging.                                                                                                                                                                                                                                                                                                                                                                                                                                                                                                                                                                                               | 3   | BMI, body fat %, lean body mass, weight                 | 20.0 | 4 |  |
| van Berkel, 2014 <sup>112</sup> | Netherlands           | RCT | <ul style="list-style-type: none"> <li>• 257 employees</li> <li>• 2 Dutch research institutes</li> </ul>                                                 | Group mindfulness training, meditation and breathing homework exercises, email coaching, goal setting, free healthy snacks, lunch walking routes, a buddy system for peer support. Control intervention: education on lifestyle behaviour-related facilities available at the worksite.                                                                                                                                                                                                                                                                                                                                                                                                                                                                                                                          | 6*  | Fruits                                                  | 9.1  | 4 |  |
| Velema, 2018 <sup>113</sup>     | Netherlands           | RCT | <ul style="list-style-type: none"> <li>• 482 employees</li> <li>• 30 worksites cafeterias</li> </ul>                                                     | The intervention consisted of 14 strategies designed to result in the purchasing of healthier food options based on product, place, price and promotion. Product: product as a better choice was visibly offered, a warm lunch meal offered in a smaller portion, fruits and vegetables offered, water offered for free, among others. Place: healthier products at the beginning of the route, of every group there was a better choice option, among others. Price: cheap combo deal was offered, prices of warm snacks increased by 25% and prices on healthier sandwich decreased 25%. Promotion: there was a promotion of food products in the better choice category when a healthier product was promoted it had a permanent spot in the cafeteria, and in the menu healthier products were listed first. | 3   | Not available <sup>††</sup>                             | 0    | 5 |  |
| Viestar, 2018 <sup>114</sup>    | Netherlands           | RCT | <ul style="list-style-type: none"> <li>• 314 blue collar male employees</li> <li>• Construction company</li> </ul>                                       | The “VIP construction program” was a tailored program including personal health coaching, information and tools to support changes in physical activity and dietary behaviour, such as coaching sessions and personalized feedback on their health screening, current lifestyle, support by self-monitoring and goal settings; Also participants received a personal energy plan among others.                                                                                                                                                                                                                                                                                                                                                                                                                   | 6*  | Weight, BMI, WC, SBP, DBP, T-Cho, fruits and vegetables | 17.2 | 4 |  |

|                                |             |     |                                                                                                                                                                                                                       |                                                                                                                                                                                                                                                                                                                                                                                                                                                                                                                                                                                                                                                                                                                                                              |    |                                            |              |   |  |
|--------------------------------|-------------|-----|-----------------------------------------------------------------------------------------------------------------------------------------------------------------------------------------------------------------------|--------------------------------------------------------------------------------------------------------------------------------------------------------------------------------------------------------------------------------------------------------------------------------------------------------------------------------------------------------------------------------------------------------------------------------------------------------------------------------------------------------------------------------------------------------------------------------------------------------------------------------------------------------------------------------------------------------------------------------------------------------------|----|--------------------------------------------|--------------|---|--|
|                                |             |     |                                                                                                                                                                                                                       | Comparison group: received the usual care, which consisted only of noncompulsory periodic health screenings.                                                                                                                                                                                                                                                                                                                                                                                                                                                                                                                                                                                                                                                 |    |                                            |              |   |  |
| Viitasalo, 2015 <sup>115</sup> | Finland     | QE  | <ul style="list-style-type: none"> <li>• 2312 employees</li> <li>• Airline company</li> </ul>                                                                                                                         | Health assessment with tailored health advice for specific conditions, employees with elevated type 2 diabetes risk were offered 1-3 one-hour individual counselling sessions with dietitian or nurse, five group education sessions, interactive website on diabetes prevention.<br>Intervention I: Participants attended one session.<br>Intervention II: Participants attended more than one session.                                                                                                                                                                                                                                                                                                                                                     | 24 | BMI, FPG, HDL, LDL, T-Cho, TG, WC, weight  | 41.7         | 2 |  |
| Vilela, 2015 <sup>116</sup>    | Brazil      | RCT | <ul style="list-style-type: none"> <li>• 60 employees</li> <li>• Chemical industry workers in Sao Paulo</li> </ul>                                                                                                    | Physical exercise program five times per week for 15 minutes, educational lectures on diet and exercise, articles distributed every 10 days on benefits of physical activity and disease prevention.                                                                                                                                                                                                                                                                                                                                                                                                                                                                                                                                                         | 4  | Body fat %, lean body mass, weight         | 0.0          | 4 |  |
| Wierenga, 2014 <sup>117</sup>  | Netherlands | QE  | <ul style="list-style-type: none"> <li>• 1208 employees</li> <li>• 2 worksites</li> </ul>                                                                                                                             | Interventions varied by location but may have included: health screening, group education, nutrition labelling and signage, cafeteria menu changes, free healthy snacks, opportunities for onsite physical activity, pedometers, mindfulness training, standing desks and tables, environmental changes such as creating a bike-friendly workplace.                                                                                                                                                                                                                                                                                                                                                                                                          | 12 | BMI, fruits, vegetables                    | Not reported | 3 |  |
| Williams, 2014 <sup>118</sup>  | USA         | RCT | <ul style="list-style-type: none"> <li>• 1207 employees</li> <li>• 30 hotels Honolulu HI</li> </ul>                                                                                                                   | Forty-eight-week group nutrition education, health promotion signage in employee areas, newsletters to reinforce group curriculum concepts, change to cafeteria recipes, a cookbook of healthier versions of familiar dishes.                                                                                                                                                                                                                                                                                                                                                                                                                                                                                                                                | 24 | BMI, WHR                                   | 81.5         | 5 |  |
| Wilson, 2016 <sup>119</sup>    | USA         | RCT | <ul style="list-style-type: none"> <li>• 916 employees</li> <li>• 5 worksites of Union Pacific Railroad Mechanical Group</li> </ul>                                                                                   | Program manual based off of Diabetes Prevention Program curriculum, colleague health coach mentorship, group education during routine meetings, environmental changes such as health promotion signage, company policies on the healthy vending, interactive website with access to all intervention materials.                                                                                                                                                                                                                                                                                                                                                                                                                                              | 6  | BMI, fruits, total fat, vegetables, weight | 64.9         | 4 |  |
| Wilson, 2016 <sup>120</sup>    |             | RCT | <ul style="list-style-type: none"> <li>• 649 employees across 3 sites</li> <li>• City-county government employees of three large counties in Georgia</li> <li>• Employees at high risk for developing T2DM</li> </ul> | 3-arm intervention, including a phone, small group and self-study arm<br>Phone arm: program manual consisting of 16 lessons on healthy eating, physical activity and barriers to weight loss, and 8 sessions with a health coach one-on-one by phone.<br>Small group arm: program manual consisting of 16 lessons on healthy eating, physical activity and barriers to weight loss, and 8 sessions with a health coach in small groups of 8 to 10 employees, including feedback, goal-setting, action plan, peer support.<br>Comparison Self-study group: program manual consisting of 16 lessons on healthy eating, physical activity and barriers to weight loss, and brief orientation on goal setting and an email reminding them to review each lesson. | 6* | Weight, BMI                                | 35.6         | 3 |  |
| Zoellner, 2016 <sup>121</sup>  | USA         | RCT | <ul style="list-style-type: none"> <li>• 1790 employees</li> <li>• 28 worksites</li> </ul>                                                                                                                            | Daily emails with eating, exercise and behavioural strategies, a participant website with behavioural weight loss tools, a kiosk to track weight and progress and quarterly monetary incentives.<br>Comparison group: a less intensive program, more text-based and delivered through four quarterly newsletters and for 1-hour group resource sessions.                                                                                                                                                                                                                                                                                                                                                                                                     | 3  | Not available <sup>††</sup>                | 18.4         | 2 |  |

RCT= randomised controlled trial; QE=quasi experimental; FFQ=food frequency questionnaire; BMI=body mass index; WC=waist circumference; WHR=waist-to-hip ratio; SBP=systolic blood pressure; DBP=diastolic blood pressure; T-Cho=total cholesterol; TG= triglycerides; LDL=low-density lipoprotein; HDL=high-density lipoprotein; FPG=fasting plasma glucose; PUFA=polyunsaturated fatty acids; SFA=saturated fatty acids

\*Follow up period longer than intervention period (Allen – 12, Balk-Moller – 22, Eshah – 2.5, Flannery – 6, Glasgow 1997 & 1995 – 24, Gomel 1997 & 1993 – 12, Guldan – 2.5, Gysan – 36, Kamioka – 20, Jamal -9, Kuehl – 6, Miller – 7, Morgan – 3.5, Peters – 6, Sorensen 2005 – 48, Sorensen 1999 – 24, Sorensen 1996 – 36, Terry – 24, van Berkel – 12, Viester – 12, Wilson [139]- 12)

† Drop-out rate calculated using common cohort between baseline and follow up cross sections when cohort analysis provided

‡ Separate cross sections analysed at baseline and follow up

§ Baseline or follow up sample size not reported (Sorensen 1996, Chen 2008, Rajaratnam 2014, Widmer 2016, Wierenga 2014)

¶ Comparison group received no intervention unless otherwise stated

\*\* 12mo data used for BMI outcome due to erroneous 24mo data

\*\*\* Mache results are from the same study one paper stratified by weight status the other paper, only by participation in intervention vs. control. For all estimates we used the more conservative estimate if results differed between the two papers.

\*\*\*\* Hossain<sup>44</sup> loss of follow up is limited to the comparison of group A compared to group B.

\*\*\*\*\* Song<sup>100</sup> Loss of follow up was calculated based on the flow-chart and clinical biometrics (most conservative approach was used)

†† Reported outcome data could not be interpreted quantitatively (Carpenter 2014, Gomel 1997 & 1993), standardized (Agarwal 2015, Edries 2013, Goetzel 2014, Guldan 1992, Pegus 2002, Saleh 2010, Sorensen 2005), or was not included in the final meta-analysis manuscript (Eshah 2010, Kwak 2009, Maes 1999, McDonough 2015, Mills 2007, Salinardi 2013 [total cholesterol:HDL ratio only], Terry 2011, Carr 2016, Doran 2018 [only the first study], Miller 2016, Peters 2018, Tan 2016, Velema 2018, Zoeller 2016)

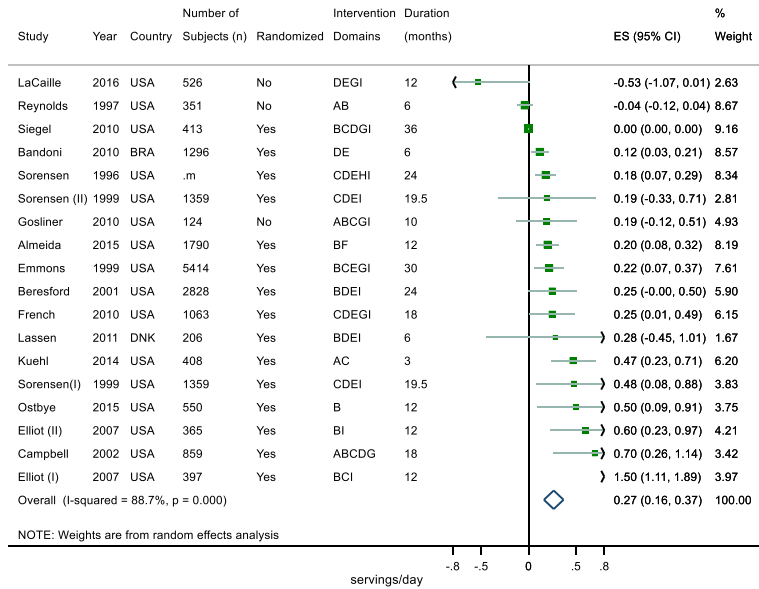

**Fig. S1. Forest plot fruit and vegetable consumption**

Intervention domains stated for Screening (A), Individual education (B), Group education (C), Food environment (D), Labelling (E), Financial incentives (F), Physical Activity (G), Self-awareness (H), and Others (I). \*m. Data not reported (Further information TableS3).

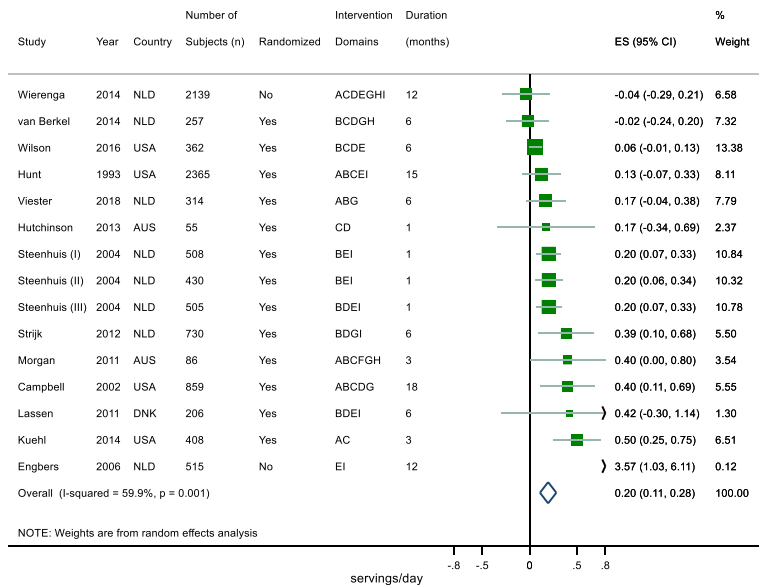

**Fig. S2. Forest plot fruit intake**

Intervention domains stated for Screening (A), Individual education (B), Group education (C), Food environment (D), Labelling (E), Financial incentives (F), Physical Activity (G), Self-awareness (H), and Others (I).

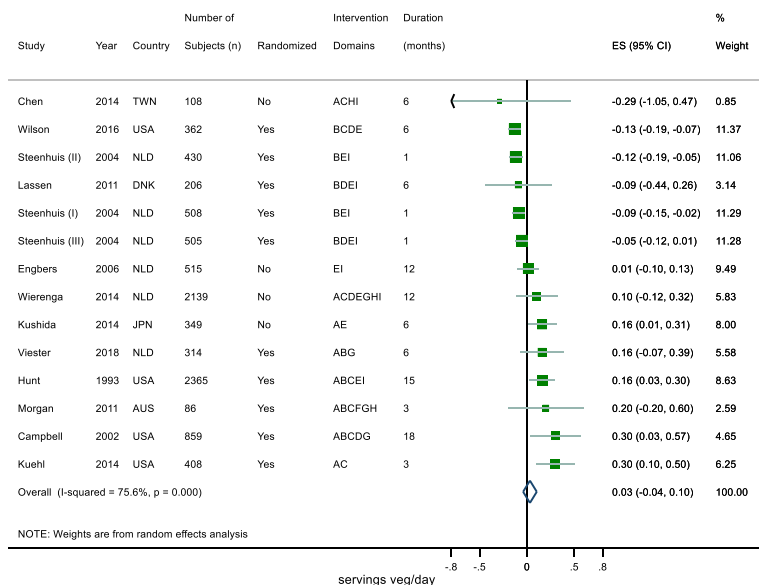

**Fig. S3. Forest plot vegetable consumption**

Intervention domains stated for Screening (A), Individual education (B), Group education (C), Food environment (D), Labelling (E), Financial incentives (F), Physical Activity (G), Self-awareness (H), and Others (I).

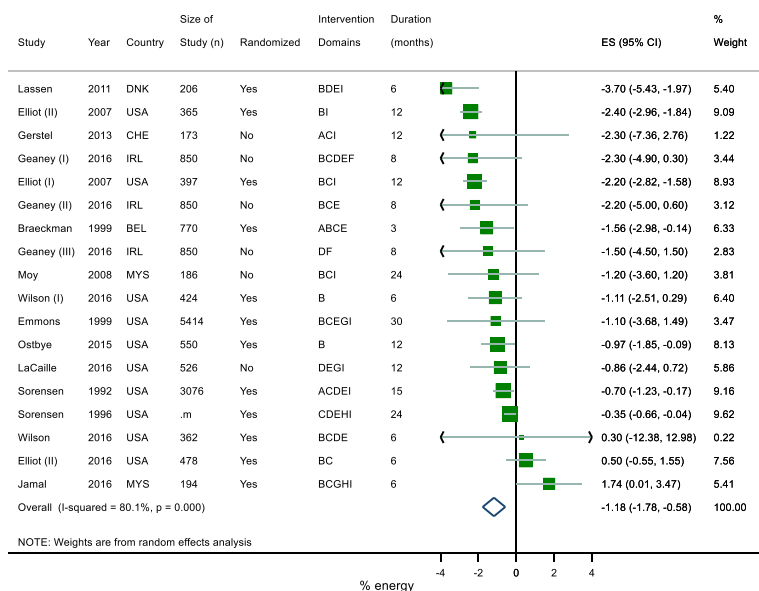

**Fig. S4. Forest plot total fat intake**

Intervention domains stated for Screening (A), Individual education (B), Group education (C), Food environment (D), Labelling (E), Financial incentives (F), Physical Activity (G), Self-awareness (H), and Others (I). \*m. Data not reported (Further information TableS3).

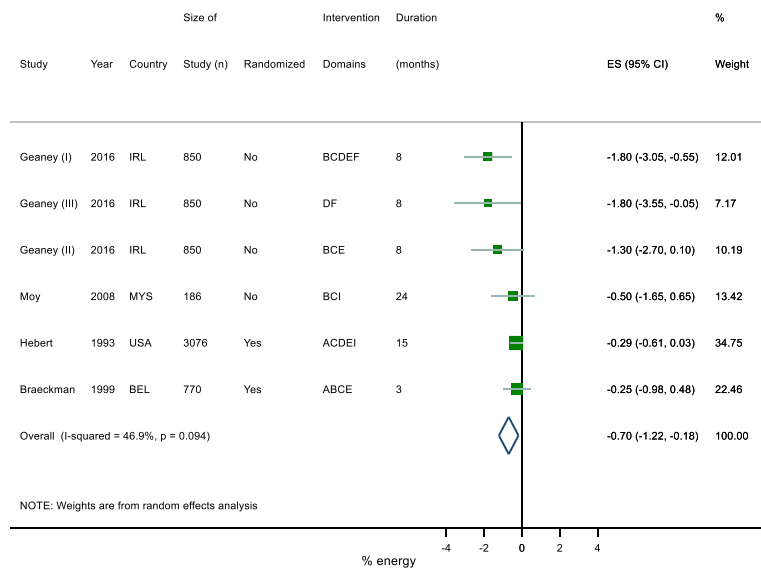

**Fig. S5. Forest plot saturated fat intake**

Intervention domains stated for Screening (A), Individual education (B), Group education (C), Food environment (D), Labelling (E), Financial incentives (F), Physical Activity (G), Self-awareness (H), and Others (I).

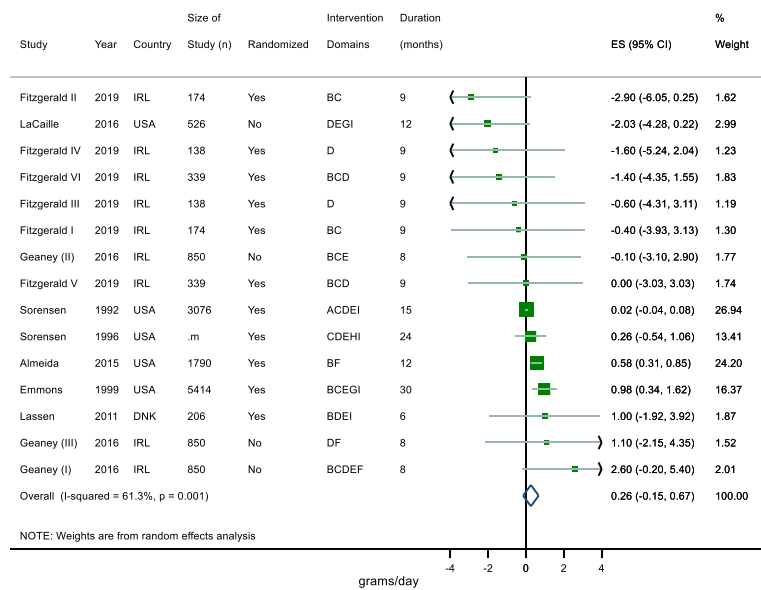

**Fig. S6. Forest plot fibre intake**

Intervention domains stated for Screening (A), Individual education (B), Group education (C), Food environment (D), Labelling (E), Financial incentives (F), Physical Activity (G), Self-awareness (H), and Others (I). \*m. Data not reported (Further information TableS3).

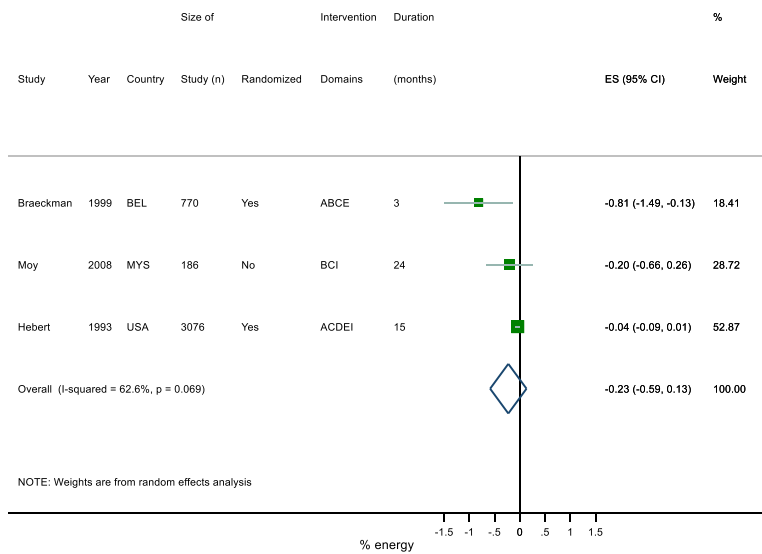

**Fig. S7. Forest plot PUFA intake**

Intervention domains stated for Screening (A), Individual education (B), Group education (C), Food environment (D), Labelling (E), Financial incentives (F), Physical Activity (G), Self-awareness (H), and Others (I).

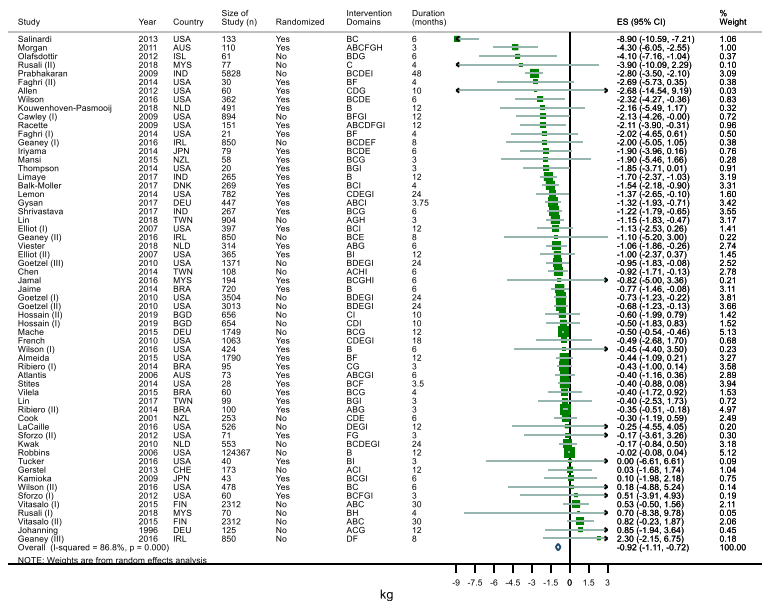

**Fig. S8. Forest plot weight**

Intervention domains stated for Screening (A), Individual education (B), Group education (C), Food environment (D), Labelling (E), Financial incentives (F), Physical Activity (G), Self-awareness (H), and Others (I).



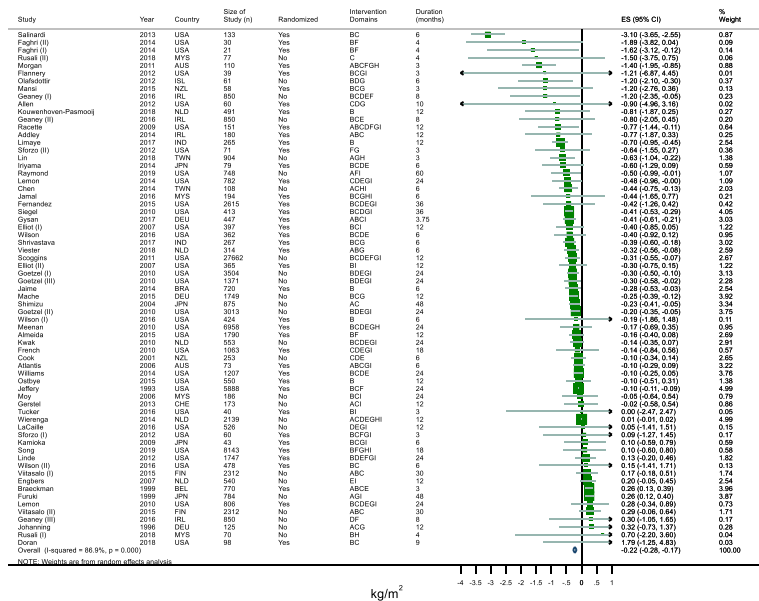

**Fig. S9. Forest plot body mass index (BMI)**

Intervention domains stated for Screening (A), Individual education (B), Group education (C), Food environment (D), Labelling (E), Financial incentives (F), Physical Activity (G), Self-awareness (H), and Others (I).

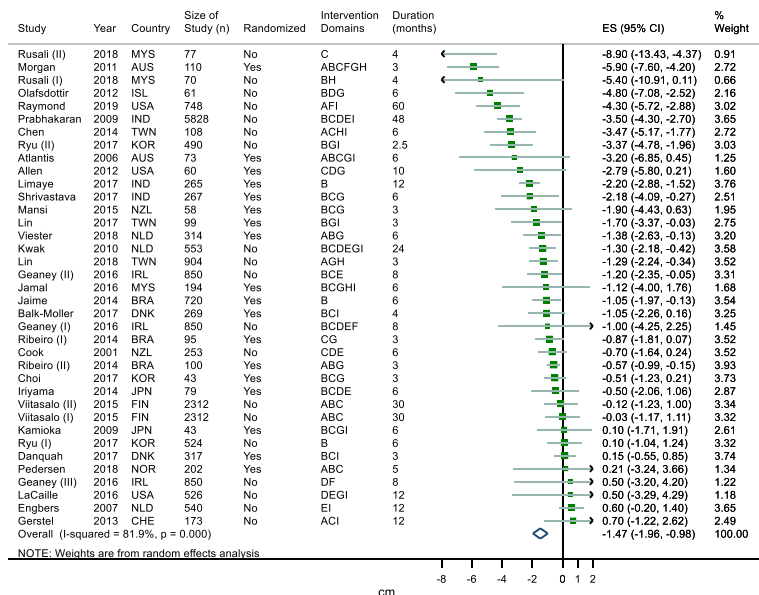

**Fig. S10. Forest plot waist circumference**

Intervention domains stated for Screening (A), Individual education (B), Group education (C), Food environment (D), Labelling (E), Financial incentives (F), Physical Activity (G), Self-awareness (H), and Others (I).

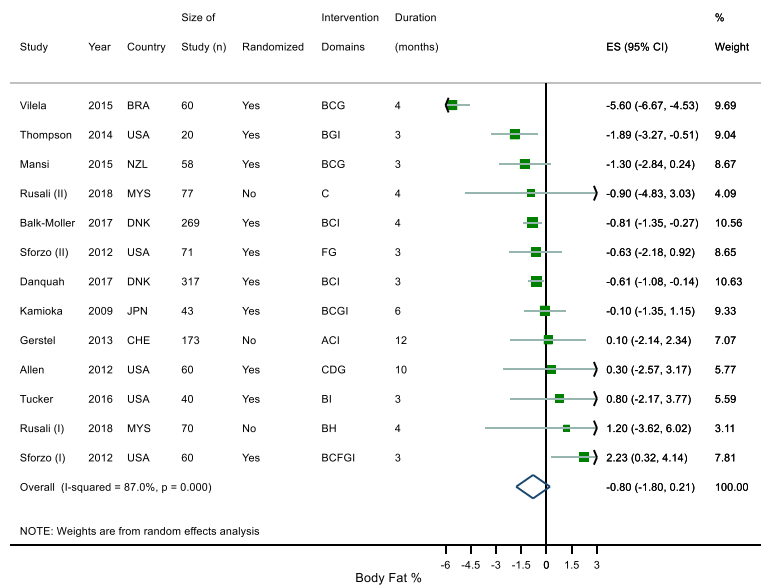

**Fig. S11. Forest plot body fat %**

Intervention domains stated for Screening (A), Individual education (B), Group education (C), Food environment (D), Labelling (E), Financial incentives (F), Physical Activity (G), Self-awareness (H), and Others (I).

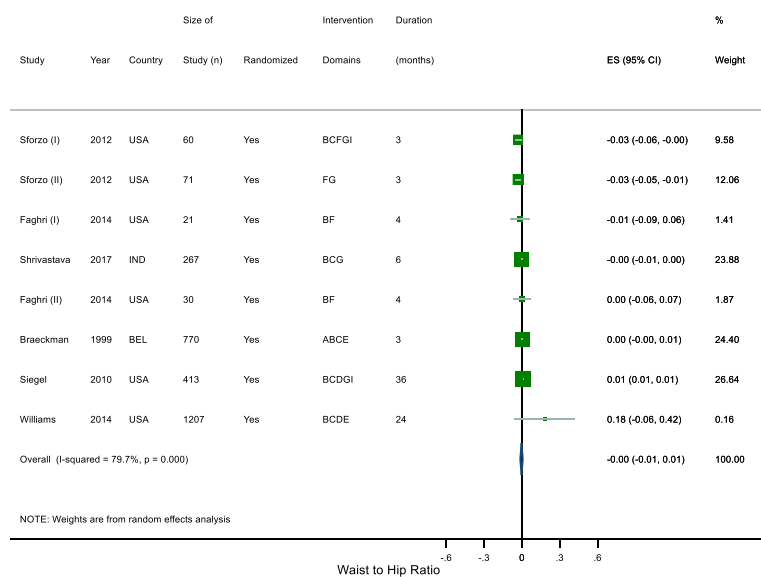

**Fig. S12. Forest plot waist-to-hip ratio**

Intervention domains stated for Screening (A), Individual education (B), Group education (C), Food environment (D), Labelling (E), Financial incentives (F), Physical Activity (G), Self-awareness (H), and Others (I).

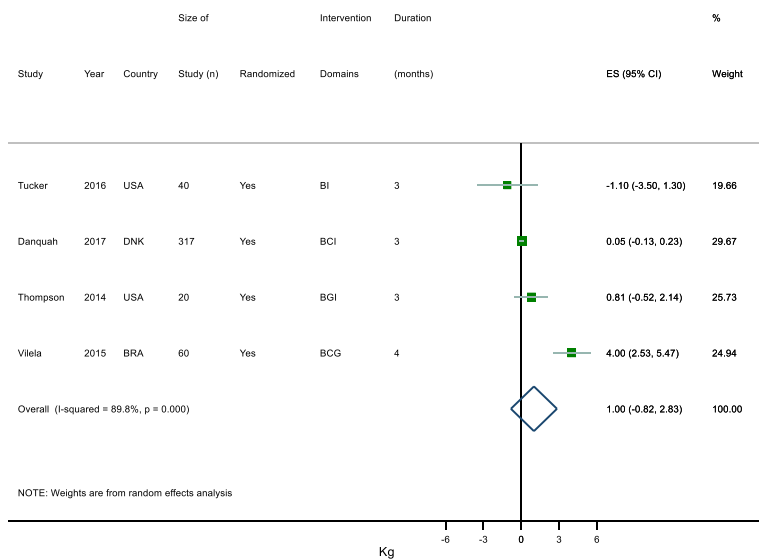

**Fig. S13. Forest plot % lean mass**

Intervention domains stated for Screening (A), Individual education (B), Group education (C), Food environment (D), Labelling (E), Financial incentives (F), Physical Activity (G), Self-awareness (H), and Others (I).

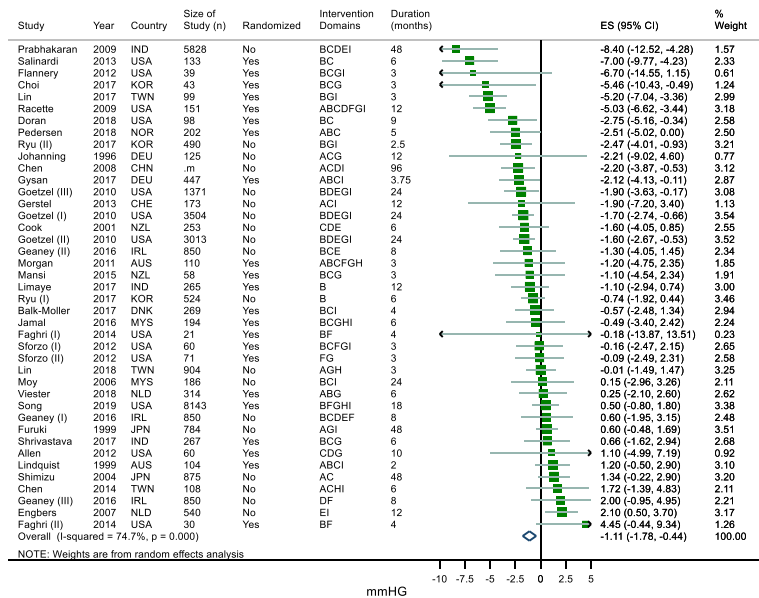

**Fig. S14. Forest plot Diastolic blood pressure**

Intervention domains stated for Screening (A), Individual education (B), Group education (C), Food environment (D), Labelling (E), Financial incentives (F), Physical Activity (G), Self-awareness (H), and Others (I). \*m. Data not reported (Further information TableS3).

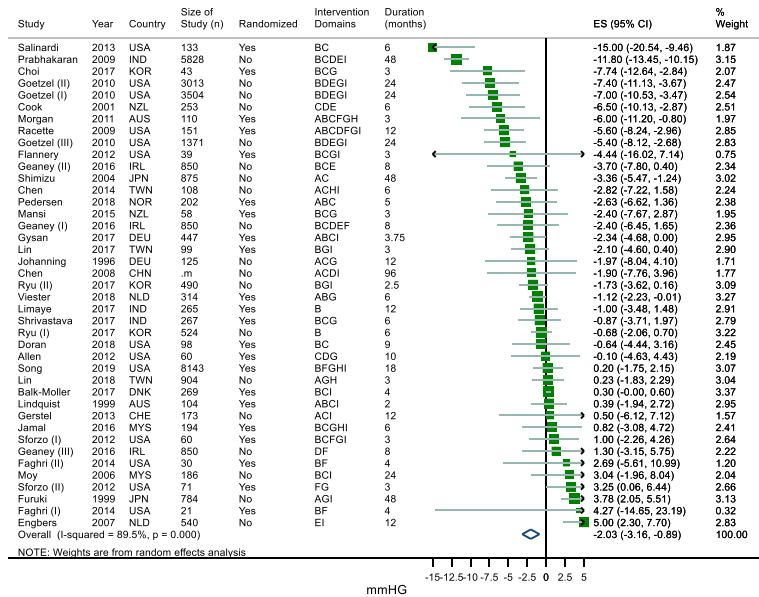

**Fig. S15. Forest plot systolic blood pressure**

Intervention domains stated for Screening (A), Individual education (B), Group education (C), Food environment (D), Labelling (E), Financial incentives (F), Physical Activity (G), Self-awareness (H), and Others (I). \*m. Data not reported (Further information TableS3).

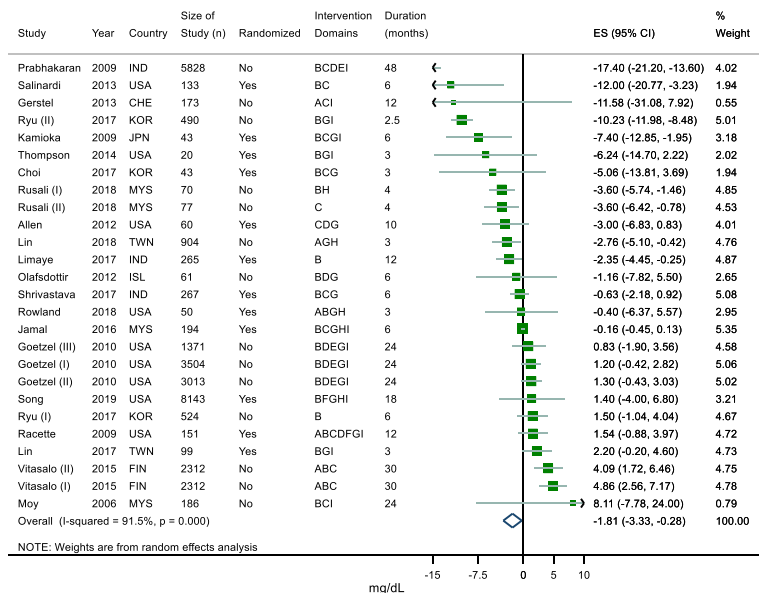

**Fig. S16. Forest plot fasting plasma glucose**

Intervention domains stated for Screening (A), Individual education (B), Group education (C), Food environment (D), Labelling (E), Financial incentives (F), Physical Activity (G), Self-awareness (H), and Others (I).

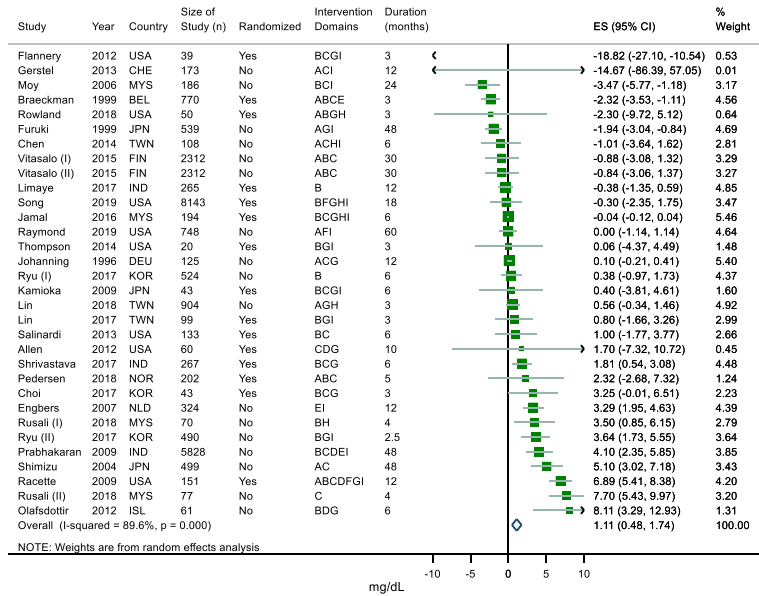

**Fig. S17. Forest plot HDL-cholesterol**

Intervention domains stated for Screening (A), Individual education (B), Group education (C), Food environment (D), Labelling (E), Financial incentives (F), Physical Activity (G), Self-awareness (H), and Others (I).

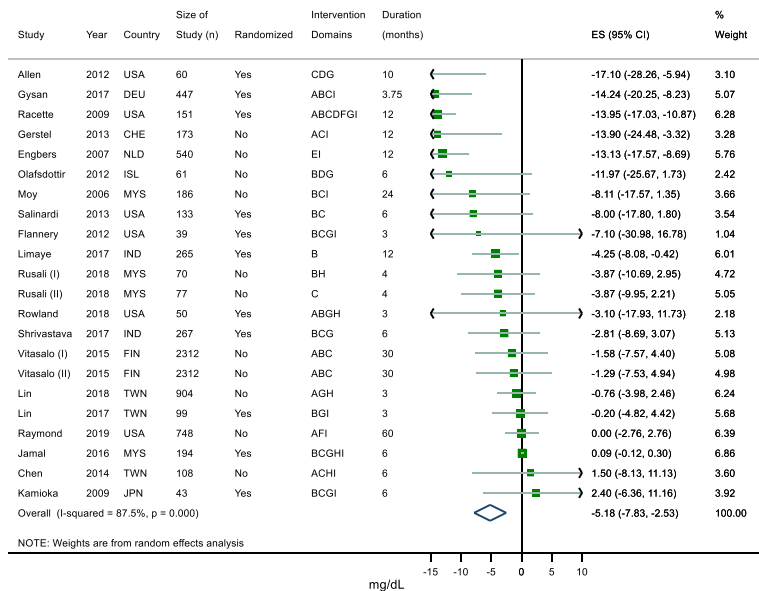

**Fig. S18. Forest plot LDL-cholesterol**

Intervention domains stated for Screening (A), Individual education (B), Group education (C), Food environment (D), Labelling (E), Financial incentives (F), Physical Activity (G), Self-awareness (H), and Others (I).

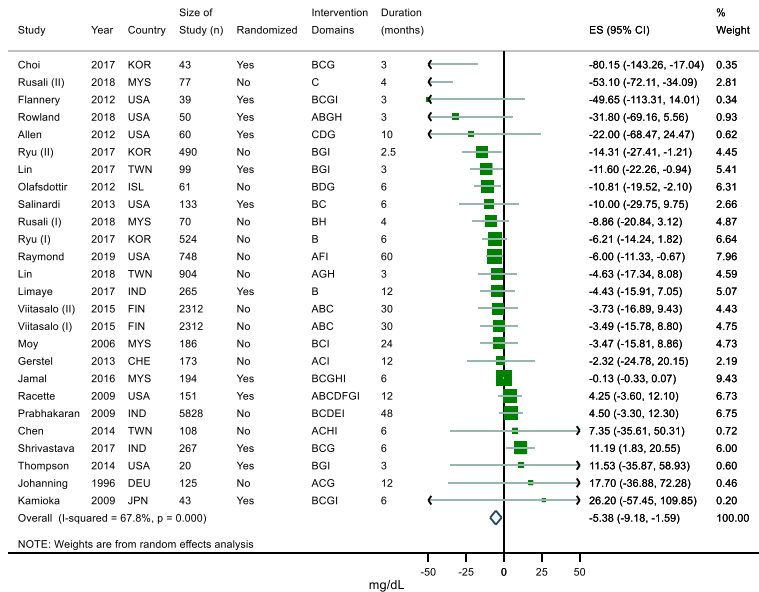

**Fig. S19. Forest plot triglycerides**

Intervention domains stated for Screening (A), Individual education (B), Group education (C), Food environment (D), Labelling (E), Financial incentives (F), Physical Activity (G), Self-awareness (H), and Others (I).

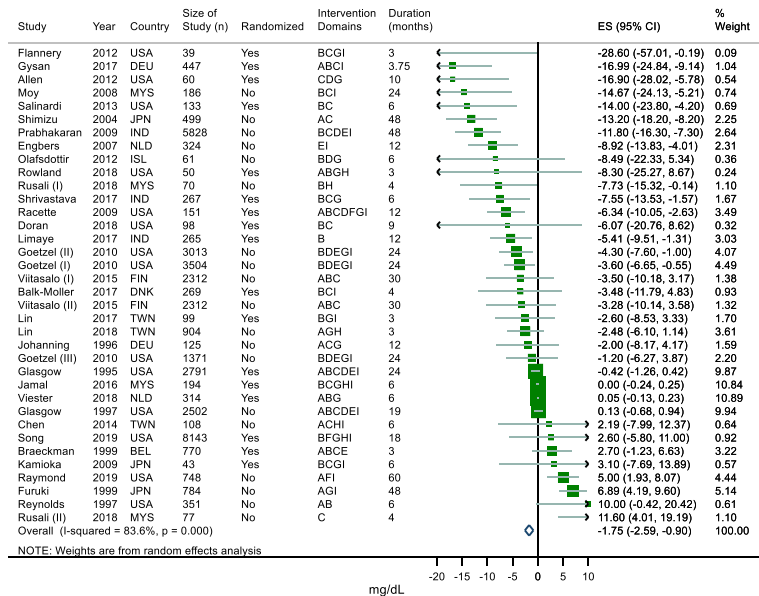

**Fig. S20. Forest plot total cholesterol**

Intervention domains stated for Screening (A), Individual education (B), Group education (C), Food environment (D), Labelling (E), Financial incentives (F), Physical Activity (G), Self-awareness (H), and Others (I).

**Table S5. Univariate meta-regressions: Heterogeneity exploration for dietary outcomes**

|                                                 | Fruits & vegetables (serv/day) |                                          | n    | Fruits (serv/day)                              |      | n                                    | Vegetables (serv/day) |                                                | n    | Total Fat (% energy intake)          |   | n                                    | Fibre (g/day) |                                      |
|-------------------------------------------------|--------------------------------|------------------------------------------|------|------------------------------------------------|------|--------------------------------------|-----------------------|------------------------------------------------|------|--------------------------------------|---|--------------------------------------|---------------|--------------------------------------|
|                                                 | n                              | $\beta$ (95% CI)<br>p of uni-variate     | n    | $\beta$ (95% CI)<br>p of uni-variate           | n    | $\beta$ (95% CI)<br>p of uni-variate | n                     | $\beta$ (95% CI)<br>p of uni-variate           | n    | $\beta$ (95% CI)<br>p of uni-variate | n | $\beta$ (95% CI)<br>p of uni-variate | n             | $\beta$ (95% CI)<br>p of uni-variate |
| <b>Overall estimate of intervention effects</b> | 18                             | <b>0.27 (0.16, 0.37)</b><br><b>0.000</b> | 15   | <b>0.20 (0.11, 0.28)</b><br><b>0.001</b>       | 14   | 0.03 (-0.04, 0.10)<br>0.389          | 18                    | <b>- 1.18 (-1.78, -0.58)</b><br><b>0.000</b>   | 15   | 0.26 (-0.15, 0.67)<br>0.215          |   |                                      |               |                                      |
| <b>Age<sup>+</sup></b>                          |                                |                                          |      |                                                |      |                                      |                       |                                                |      |                                      |   |                                      |               |                                      |
| Years                                           | 13                             | -0.032 (-0.151, 0.087)<br>0.563          | 13   | -0.001 (-0.030, 0.029)<br>0.965                | 13   | 0.006 (-0.021, 0.033)<br>0.621       | 17                    | 0.066 (-0.248, 0.380)<br>0.660                 | 9    | 0.042 (-0.196, 0.283)<br>0.678       |   |                                      |               |                                      |
| <b>Sex<sup>+</sup></b>                          |                                |                                          |      |                                                |      |                                      |                       |                                                |      |                                      |   |                                      |               |                                      |
| % Males                                         | 18                             | 0.005 (-0.001, 0.011)<br>0.097           | 15   | -0.000 (-0.004, 0.004)<br>0.855                | 14   | -0.001 (-0.005, 0.002)<br>0.502      | 17                    | <b>-0.022 (-0.042, -0.003)</b><br><b>0.027</b> | 15   | 0.002 (-0.028, 0.032)<br>0.865       |   |                                      |               |                                      |
| <b>Number of Components<sup>+</sup></b>         |                                |                                          |      |                                                |      |                                      |                       |                                                |      |                                      |   |                                      |               |                                      |
|                                                 | 18                             | -0.008 (-0.086, 0.070)<br>0.831          | 15   | <b>-0.048 (-0.086, -0.010)</b><br><b>0.017</b> | 14   | 0.0003 (-0.050, 0.050)<br>0.990      | 18                    | 0.195 (-0.047, 0.436)<br>0.107                 | 15   | 0.095 (-0.109, 0.298)<br>0.334       |   |                                      |               |                                      |
| <b>Design<sup>++</sup></b>                      |                                |                                          |      |                                                |      |                                      |                       |                                                |      |                                      |   |                                      |               |                                      |
| Randomised Intervention                         | 15**                           | 0.367 (0.177, 0.557)<br>0.001            | 13** | 0.201 (0.094, 0.308)<br>0.001                  | 10** | 0.031 (-0.079, 0.142)<br>0.551       | 12**                  | -1.084 (-1.855, -0.313)<br>0.009               | 11** | 0.279 (-0.237, 0.794)<br>0.264       |   |                                      |               |                                      |
| Non-Randomised Intervention                     | 3                              | -0.445 (-0.915, 0.026)<br>0.062          | 2    | -0.190 (-0.617, 0.237)<br>0.355                | 4    | 0.039 (-0.182, 0.260)<br>0.707       | 6                     | -0.477 (-2.148, 1.195)<br>0.554                | 4    | -0.199 (-1.994, 1.595)<br>0.814      |   |                                      |               |                                      |
| <b>Location<sup>++</sup></b>                    |                                |                                          |      |                                                |      |                                      |                       |                                                |      |                                      |   |                                      |               |                                      |
| North America (US & Canada)                     | 16**                           | 0.313 (0.098, 0.527)<br>0.007            | 4    | 0.035 (-0.204, 0.272)<br>0.759                 | 4    | 0.128 (-0.081, 0.336)<br>0.205       | 10**                  | -1.047 (-1.757, -0.338)<br>0.007               | 5    | 0.450 (-0.874, 1.773)<br>0.476       |   |                                      |               |                                      |
| Europe, Australia, New Zealand                  | 1                              | -0.033 (-1.193, 1.128)<br>0.953          | 11** | 0.183 (0.046, 0.322)<br>0.013                  | 8**  | -0.011 (-0.133, 0.111)<br>0.851      | 6                     | -1.268 (-2.751, 0.214)<br>0.088                | 10** | -0.115 (-1.330, 1.100)<br>0.841      |   |                                      |               |                                      |
| Other (Asia, Latin America, Africa)             | 1                              | -0.195 (-1.013, 0.623)<br>0.619          | 0    | -<br>0.759*                                    | 2    | 0.117 (-0.217, 0.450)<br>0.458       | 2                     | 1.602 (-.540, 3.744)<br>0.132                  | 0    | -<br>0.476*                          |   |                                      |               |                                      |
| Wald test (p value)*                            |                                | 0.879*                                   |      | 0.759*                                         |      | 0.390*                               |                       | 0.057*                                         |      |                                      |   |                                      |               |                                      |
| <b>Type of Workplace<sup>++</sup></b>           |                                |                                          |      |                                                |      |                                      |                       |                                                |      |                                      |   |                                      |               |                                      |
| Office                                          | 2                              | -0.331 (-0.968, 0.306)<br>0.282          | 1    | <b>3.398 (0.534, 6.261)</b><br><b>0.024</b>    | 1    | -0.036 (-0.403, 0.331)<br>0.833      | 0                     | -                                              | 0    | -                                    |   |                                      |               |                                      |
| Hospital                                        | 3                              | -0.335 (-0.963, 0.293)<br>0.270          | 1    | 0.211 (-0.210, 0.633)<br>0.294                 | 0    | -                                    | 1                     | 0.489 (-2.500, 3.478)<br>0.731                 | 0    | -                                    |   |                                      |               |                                      |
| School                                          | 2                              | -0.194 (-0.861, 0.474)<br>0.542          | 0    | -                                              | 0    | -                                    | 2                     | 1.492 (-0.604, 3.587)<br>0.149                 | 0    | -                                    |   |                                      |               |                                      |
| Factory                                         | 2                              | -0.017 (-0.663, 0.696)<br>0.959          | 3    | 0.018 (-0.209, 0.245)<br>0.865                 | 4    | -0.015 (-0.276, 0.246)<br>0.903      | 6                     | -0.334 (-2.118, 1.451)<br>0.695                | 1    | 0.826 (-0.310, 1.962)<br>0.140       |   |                                      |               |                                      |
| Mixed and Other <sup>1</sup>                    | 9**                            | 0.409 (0.119, 0.699)<br>0.009            | 10** | 0.175 (0.063, 0.285)<br>0.005                  | 9**  | 0.050 (-0.073, 0.173)<br>0.393       | 9**                   | -1.349 (-2.246, -0.452)<br>0.006               | 9**  | 0.152 (-0.298, 0.602)<br>0.478       |   |                                      |               |                                      |
| Wald test (p value)*                            |                                | 0.530*                                   |      | 0.100*                                         |      | 0.973*                               |                       | 0.848*                                         |      | 0.140*                               |   |                                      |               |                                      |
| <b>Quality Score<sup>++</sup></b>               |                                |                                          |      |                                                |      |                                      |                       |                                                |      |                                      |   |                                      |               |                                      |

|                                      |      |                                |     |                             |     |                             |      |                                |      |                          |
|--------------------------------------|------|--------------------------------|-----|-----------------------------|-----|-----------------------------|------|--------------------------------|------|--------------------------|
| 0-3                                  | 4    | -0.310 (-0.751, 0.131)         | 6   | -0.044 (-0.272, 0.184)      | 7** | -0.017 (-0.139, 0.104)      | 8    | 0.226 (-1.204, 1.655)          | 10** | -0.570 (-1.662, 0.521)   |
|                                      |      | 0.156                          |     | 0.683                       |     | 0.764                       |      | 0.742                          |      | 0.279                    |
| 4-5                                  | 14** | 0.366 (0.157, 0.575)           | 9** | 0.213 (0.067, 0.360)        | 7   | 0.127 (-0.056, 0.311)       | 10** | -1.265 (-2.112, -0.417)        | 5    | 0.997 (-0.1916, 2.186)   |
|                                      |      | 0.002                          |     | 0.008                       |     | 0.157                       |      | 0.006                          |      | 0.093                    |
| <b>Duration**</b>                    |      |                                |     |                             |     |                             |      |                                |      |                          |
| 0-5 Months                           | 1    | 0.161 (-0.735, 1.058)          | 6   | 0.153 (-0.013, 0.318)       | 5   | -0.027 (-0.219, 0.165)      | 1    | -0.228 (-3.288, 2.828)         | 0    | -                        |
|                                      |      | 0.606                          |     | 0.067                       |     | 0.761                       |      | 0.875                          |      |                          |
| 6-12 Months                          | 9**  | 0.309 (0.010, 0.608)           | 7** | 0.083 (-0.029, 0.196)       | 7** | 0.022 (-0.111, 0.155)       | 13** | -1.332 (-2.228, -0.436)        | 12** | -0.047 (-0.929, 0.836)   |
|                                      |      | 0.044                          |     | 0.133                       |     | 0.721                       |      | 0.007                          |      | 0.910                    |
| 13-23 Months                         | 4    | 0.092 (-0.457, 0.642)          | 2   | 0.138 (-0.145, 0.421)       | 2   | 0.191 (-0.085, 0.466)       | 1    | 0.633 (-2.060, 3.324)          | 1    | 0.067 (-1.614, 1.747)    |
|                                      |      | 0.724                          |     | 0.309                       |     | 0.155                       |      | 0.622                          |      | 0.933                    |
| 24+ Months                           | 4    | -0.149 (-0.656, 0.359)         | 0   | -                           | 0   | -                           | 3    | 0.599 (-1.412, 2.610)          | 2    | 0.685 (-0.772, 2.141)    |
|                                      |      | 0.539                          |     | -                           |     | -                           |      | 0.533                          |      | 0.326                    |
| Wald test (p value)*                 |      | 0.814*                         |     | 0.158*                      |     | 0.256*                      |      | 0.881*                         |      | 0.587*                   |
| <b>Intervention Components** ~</b>   |      |                                |     |                             |     |                             |      |                                |      |                          |
| Intercep                             |      | 0.271 (-0.561, 1.104)          |     | 0.459 (-0.083, 1.001)       |     | -0.019 (-0.336, 0.297)      |      | -0.378 (-2.868, 2.111)         |      | -2.085 (-6.570, 2.399)   |
| Individual Education                 | 11   | 0.283 (-0.330, 0.896)          | 11  | -0.151 (-0.632, 0.329)      | 9   | -0.134 (-0.302, 0.034)      | 13   | -0.524 (-2.836, 1.787)         | 9    | -0.505 (-6.770, 5.761)   |
|                                      |      | 0.318                          |     | 0.455                       |     | 0.091                       |      | 0.615                          |      | 0.844                    |
| Group Education                      | 10   | <b>0.607 (0.031, 1.183)</b>    | 8   | 0.012 (-0.423, 0.444)       | 7   | 0.038 (-0.132, 0.208)       | 12   | 0.953 (-0.106, 2.011)          | 9    | 1.961 (-3.171, 7.095)    |
|                                      |      | <b>0.041</b>                   |     | 0.952                       |     | 0.570                       |      | 0.072                          |      | 0.371                    |
| Food Environment                     | 10   | -0.066 (-0.613, 0.481)         | 8   | 0.013 (-0.282, 0.308)       | 5   | 0.052 (-0.062, 0.167)       | 7    | 1.642 (-1.327, 4.610)          | 10   | -0.169 (-3.596, 3.259)   |
|                                      |      | 0.788                          |     | 0.917                       |     | 0.273                       |      | 0.238                          |      | 0.904                    |
| Labelling and Information            | 9    | -0.144 (-0.821, 0.532)         | 8   | -0.269 (-0.710, 0.172)      | 9   | -0.064 (-0.363, 0.235)      | 9    | <b>-2.156 (-4.066, -0.247)</b> | 7    | 0.368 (-3.580, 4.317)    |
|                                      |      | 0.635                          |     | 0.177                       |     | 0.582                       |      | <b>0.031</b>                   |      | 0.820                    |
| Screening                            | 4    | -0.335 (-1.036, 0.366)         | 6   | -0.028 (-0.492, 0.437)      | 8   | <b>0.241 (0.059, 0.423)</b> | 3    | 0.900 (-0.807, 2.607)          | 1    | -3.446 (-15.203, 8.310)  |
|                                      |      | 0.303                          |     | 0.884                       |     | <b>0.021</b>                |      | 0.259                          |      | 0.485                    |
| Financial Incentives                 | 1    | -0.354 (-1.320, 0.611)         | 1   | 0.473 (-0.441, 1.387)       | 1   | 0.355 (-0.410, 1.120)       | 2    | -2.237 (-5.338, 0.864)         | 3    | 3.170 (-0.902, 7.242)    |
|                                      |      | 0.422                          |     | 0.241                       |     | 0.268                       |      | 0.135                          |      | 0.102                    |
| Physical Activity                    | 6    | -0.520 (-1.065, 0.025)         | 6   | -0.050 (-0.720, 0.620)      | 4   | 0.107 (-0.277, 0.492)       | 3    | <b>2.122 (0.600, 3.644)</b>    | 3    | -2.447 (-10.823, 5.929)  |
|                                      |      | 0.059                          |     | 0.854                       |     | 0.481                       |      | <b>0.012</b>                   |      | 0.486                    |
| Self Awareness                       | 1    | -0.351 (-1.247, 0.545)         | 3   | -0.313 (-0.990, 0.364)      | 3   | -0.388 (-0.960, 0.185)      | 2    | 1.404 (-0.195, 3.002)          | 1    | -3.206 (-15.010, 8.597)  |
|                                      |      | 0.393                          |     | 0.287                       |     | 0.133                       |      | 0.078                          |      | 0.516                    |
| Other <sup>2</sup>                   | 12   | -0.137 (-0.801, 0.527)         | 8   | 0.152 (-0.213, 0.517)       | 8   | 0.112 (-0.059, 0.283)       | 10   | <b>-1.816 (-2.907, -0.725)</b> | 5    | 3.390 (-5.959, 12.739)   |
|                                      |      | 0.648                          |     | 0.334                       |     | 0.144                       |      | <b>0.005</b>                   |      | 0.394                    |
| Wald test (p value)*                 |      | 0.340*                         |     | 0.361*                      |     | 0.053*                      |      | <b>0.023*</b>                  |      | 0.515*                   |
| <b>Target(s) of Intervention** ~</b> |      |                                |     |                             |     |                             |      |                                |      |                          |
| Intercep                             |      | 0.268 (-0.030, 0.566)          |     | -0.187 (-0.610, 0.236)      |     | -0.110 (-0.534, 0.314)      |      | -3.266 (-4.556, -1.977)        |      | 0.318 (-1.663, 2.298)    |
| Weight Loss                          | 6    | <b>-0.477 (-0.916, -0.037)</b> | 5   | -0.005 (-0.252, 0.243)      | 6   | -0.090 (-0.368, 0.188)      | 11   | <b>1.315 (0.334, 2.296)</b>    | 12   | -0.558 (-2.150, 1.035)   |
|                                      |      | <b>0.035</b>                   |     | 0.967                       |     | 0.481                       |      | <b>0.012</b>                   |      | 0.457                    |
| Diet                                 | 18   | (Drop due to collinearity)     | 14  | 0.380 (-0.030, 0.789)       | 13  | 0.100 (-0.309, 0.509)       | 18   | Drop due to collinearity       | 15   | Drop due to collinearity |
|                                      |      |                                |     | 0.066                       |     | 0.593                       |      |                                |      |                          |
| Physical Activity                    | 11   | <b>0.476 (0.045, 0.908)</b>    | 9   | -0.124 (-0.390, 0.142)      | 8   | 0.027 (-0.237, 0.292)       | 11   | 1.130 (-0.0769, 2.337)         | 3    | 0.410 (-0.874, 1.693)    |
|                                      |      | <b>0.033</b>                   |     | 0.323                       |     | 0.819                       |      | 0.064                          |      | 0.497                    |
| Other <sup>3</sup>                   | 7    | -0.232 (-0.578, 0.113)         | 5   | <b>0.274 (0.059, 0.489)</b> | 5   | <b>0.274 (0.007, 0.542)</b> | 6    | <b>1.969 (0.747, 3.191)</b>    | 3    | 0.169 (-1.346, 0.685)    |
|                                      |      | 0.171                          |     | <b>0.018</b>                |     | <b>0.045</b>                |      | <b>0.004</b>                   |      | 0.810                    |
| Wald test (p value)*                 |      | 0.097*                         |     | 0.069*                      |     | 0.223*                      |      | <b>0.007*</b>                  |      | 0.585*                   |



Abbreviations: servings/dal (serv/day); number of observations (n). <sup>1</sup>Mixed is defined as a combination of the pre-specified work type whereas, other differs from our pre-specified categories (e.g. a mixed worksite would be a company-wide WWP that targeted both white-collar executives as well as the blue-collar. <sup>2</sup> Other: components not included in previous groups, including employee advisory committees. <sup>3</sup> Other intervention targets included the reduction in CVD risk factors, smoking cessation, stress reduction, diabetes, or cancer prevention. <sup>+</sup> Age, sex, and number of components were introduced into the univariate meta-regression as continuous variables. <sup>++</sup> The categorical variables of design, location, type of worksite, quality score, duration, intervention components, and targets of intervention were coded into subgroup categories of dichotomous variables (0,1) and introduced coded into the meta-regressions. <sup>\*\*</sup> The reference, the variable omitted in the meta-regression. <sup>~</sup> Interventions had at least two components each and interventions may have had more than one target outcome. Due to this, multivariate meta-regression were performed for intervention components and targets of intervention as the components or targets could not be analysed independently. In addition, N's will not sum to number of studies. <sup>\*</sup> Walt test was conducted for the univariate with 3 or more subgroup categories of dichotomous variables or multivariate models (intervention components and targets of intervention). The **bold** results indicate the significance of the univariate or multivariate (intervention components and targets of intervention) meta-regression based on an alpha of 0.05. Based on these results, multivariate meta-regression were performed (Results presented in Tables 9 and 10).

**Table S6. Univariate meta-regressions: Heterogeneity exploration for anthropometric outcomes**

|                                                 | n    | BMI (kg/m <sup>2</sup> )<br>β (95% CI)<br>p of uni-variate | n    | Weight (kg)<br>β (95% CI)<br>p of uni-variate  | n    | Waist Circumference (cm)<br>β (95% CI)<br>p of uni-variate | n    | Body Fat (%)<br>β (95% CI)<br>p of uni-variate |
|-------------------------------------------------|------|------------------------------------------------------------|------|------------------------------------------------|------|------------------------------------------------------------|------|------------------------------------------------|
| <b>Overall estimate of intervention effects</b> | 67   | <b>-0.22 (-0.28, -0.17)</b><br><b>0.000</b>                | 59   | <b>-0.92 (-1.11, -0.72)</b><br><b>0.000</b>    | 37   | <b>-1.47 (-1.96, -0.98)</b><br><b>0.000</b>                | 13   | -0.80 (-1.80, -0.21)<br>0.121                  |
| <b>Age<sup>+</sup></b>                          |      |                                                            |      |                                                |      |                                                            |      |                                                |
| Years                                           | 60   | -0.010 (-0.037, 0.017)<br>0.455                            | 53   | -0.031 (-0.102, 0.039)<br>0.372                | 35   | 0.042 (-0.079, 0.162)<br>0.486                             | 12   | 0.079 (-0.137, 0.295)<br>0.432                 |
| <b>Sex<sup>+</sup></b>                          |      |                                                            |      |                                                |      |                                                            |      |                                                |
| % Males                                         | 64   | 0.002 (-0.003, 0.007)<br>0.500                             | 57   | 0.001 (-0.011, 0.013)<br>0.839                 | 35   | -0.004 (-0.024, 0.016)<br>0.720                            | 12   | -0.031 (-0.067, 0.006)<br>0.092                |
| <b>Number of Components<sup>+</sup></b>         | 67   | 0.010 (-0.040, 0.059)<br>0.695                             | 59   | -0.062 (-0.220, 0.097)<br>0.440                | 37   | -0.159 (-0.499, 0.180)<br>0.349                            | 13   | 0.373 (-0.382, 1.128)<br>0.300                 |
| <b>Design<sup>++</sup></b>                      |      |                                                            |      |                                                |      |                                                            |      |                                                |
| Randomised Intervention                         | 41** | -0.394 (-0.564, -0.224)<br>0.000                           | 35** | -1.362 (-1.858, -0.867)<br>0.000               | 18   | 0.248 (-0.971, 1.466)<br>0.683                             | 10** | -0.904 (-2.295, 0.487)<br>0.180                |
| Non-Randomised Intervention                     | 26   | 0.211 (-0.050, 0.472)<br>0.111                             | 24   | -0.692 (-0.069, 1.452)<br>0.074                | 19** | -1.626 (-2.483, -0.765)<br>0.001                           | 3    | -0.963 (-2.568, 4.494)<br>0.560                |
| <b>Location<sup>++</sup></b>                    |      |                                                            |      |                                                |      |                                                            |      |                                                |
| North America (US & Canada)                     | 33** | -0.360 (-0.556, -0.164)<br>0.000                           | 24** | -1.377 (-2.019, -0.734)<br>0.000               | 3    | -1.718 (-4.296, 0.860)<br>0.185                            | 5**  | -0.048 (-1.974, 2.070)<br>0.959                |
| Europe, Australia, New Zealand                  | 21   | 0.132 (-0.169, 0.432)<br>0.385                             | 18   | 0.567 (-0.380, 1.513)<br>0.235                 | 17** | -1.110 (-1.993, -0.227)<br>0.015                           | 4    | -0.736 (-3.617, 2.144)<br>0.581                |
| Other (Asia, Latin America, Africa)             | 13   | 0.049 (-0.303, 0.400)<br>0.783                             | 17   | 0.321 (-0.617, 1.513)<br>0.409                 | 17   | -0.576 (-1.807, 0.655)<br>0.348                            | 4    | -2.080 (-5.218, 1.058)<br>0.171                |
| Walt test (p value)                             |      | 0.682*                                                     |      | 0.469*                                         |      | 0.338*                                                     |      | 0.371*                                         |
| <b>Type of Workplace<sup>++</sup></b>           |      |                                                            |      |                                                |      |                                                            |      |                                                |
| Office                                          | 10   | <b>-0.420 (-0.840, -0.001)</b><br><b>0.050</b>             | 10   | <b>-1.282 (-2.524, -0.040)</b><br><b>0.043</b> | 11   | 0.053 (-1.513, 1.619)<br>0.945                             | 7**  | 0.106 (-1.364, 1.576)<br>0.874                 |
| Hospital                                        | 8    | -0.207 (-0.823, 0.408)<br>0.503                            | 10   | -0.448 (-1.529, 0.634)<br>0.410                | 4    | 0.748 (-1.359, 2.856)<br>0.475                             | 3    | -0.983 (-3.489, 1.523)<br>0.398                |
| School                                          | 4    | -0.140 (-0.675, 0.394)<br>0.602                            | 2    | -0.589 (-2.963, 1.785)<br>0.621                | 1    | 0.292 (-4.362, 4.946)<br>0.899                             | 0    | -                                              |
| Factory                                         | 13   | -0.150 (-0.484, 0.184)<br>0.373                            | 14   | -0.680 (-1.628, 0.268)<br>0.156                | 9    | -0.810 (-2.464, 0.844)<br>0.326                            | 2    | <b>-3.771 (-6.499, -0.922)</b><br><b>0.015</b> |
| Mixed and Other <sup>1</sup>                    | 32** | -0.204 (-0.380, -0.029)<br>0.023                           | 23** | -0.660 (-1.228, -0.093)<br>0.023               | 12** | -1.412 (-2.490, -0.335)<br>0.012                           | 1    | -0.006 (-4.224, 4.211)<br>0.997                |
| Walt test (p value)*                            |      | 0.2351*                                                    |      | 0.177*                                         |      | 0.512*                                                     |      | 0.081*                                         |
| <b>Quality Score<sup>++</sup></b>               |      |                                                            |      |                                                |      |                                                            |      |                                                |
| 0-3                                             | 27** | -0.257 (-0.432, -0.083)<br>0.004                           | 34** | -0.799 (-1.314, -0.285)<br>0.003               | 22** | -1.512 (-2.307, 0.717)<br>0.000                            | 6    | 1.129 (-1.427, 3.686)<br>0.921                 |
| 4-5                                             | 30   | -0.110 (-0.375, 0.155)<br>0.411                            | 25   | -0.597 (-1.361, 0.167)<br>0.123                | 15   | 0.023 (-1.220, 1.266)<br>0.970                             | 7**  | -1.220 (-2.851, 0.411)<br>0.352                |
| <b>Duration<sup>++</sup></b>                    |      |                                                            |      |                                                |      |                                                            |      |                                                |
| 0-5 Months                                      | 13   | -0.199 (-0.614, 0.215)<br>0.341                            | 18   | -0.017 (-0.953, 0.918)<br>0.970                | 13   | -0.641 (-1.996, 0.715)<br>0.344                            | 10** | -0.999 (-2.439, 0.442)<br>0.155                |

|                                                 |      |                                |      |                                |      |                         |    |                          |
|-------------------------------------------------|------|--------------------------------|------|--------------------------------|------|-------------------------|----|--------------------------|
| 6-12 Months                                     | 34** | -0.384 (-0.618, -0.244)        | 32** | -1.174 (-1.723, -0.625)        | 29** | -1.174 (-2.048, -0.300) | 3  | 1.073 (-1.962, 4.108)    |
|                                                 |      | 0.000                          |      | 0.000                          |      | 0.001                   |    | 0.453                    |
| 13-23 Months                                    | 2    | 0.364 (-0.434, 1.163)          | 1    | 0.684 (-2.666, 4.034)          | 0    | -                       | 0  | -                        |
|                                                 |      | 0.365                          |      | 0.684                          |      |                         |    |                          |
| 24+ Months                                      | 18   | 0.262 (-0.019, 0.543)          | 8    | 0.490 (-0.574, 1.554)          | 5    | -0.657 (-2.402, 1.089)  | 0  | -                        |
|                                                 |      | 0.068                          |      | 0.360                          |      | 0.986                   |    |                          |
| Walt test (p value)*                            |      | 0.104*                         |      | 0.416*                         |      | 0.567*                  |    | 0.453*                   |
| <b>Intervention Components<sup>++</sup> ~</b>   |      |                                |      |                                |      |                         |    |                          |
| Intercep                                        |      | -0.413 (-0.834, -0.008)        |      | -0.117 (-1.414, 1.179)         |      | -0.755 (-2.520, 1.010)  |    | -1.636 (-6.939, 3.668)   |
| Individual Education                            | 50   | -0.066 (-0.406, 0.274)         | 44   | <b>-1.117 (-2.165, -0.069)</b> | 26   | -0.448 (-1.854, 0.958)  | 9  | 0.527 (-6.169, 7.223)    |
|                                                 |      | 0.700                          |      | <b>0.037</b>                   |      | 0.519                   |    | 0.848                    |
| Group Education                                 | 42   | -0.061 (-0.352, 0.229)         | 35   | -0.389 (-1.236, 0.459)         | 23   | 0.155 (-1.087, 1.397)   | 9  | -0.343 (-3.930, 3.243)   |
|                                                 |      | 0.673                          |      | 0.361                          |      | 0.900                   |    | 0.815                    |
| Food Environment                                | 23   | -0.266 (-0.749, 0.217)         | 17   | -0.910 (-2.682, 0.861)         | 9    | -1.054 (-3.066, 0.958)  | 1  | 3.927 (-4.780, 12.634)   |
|                                                 |      | 0.275                          |      | 0.307                          |      | 0.292                   |    | 0.875                    |
| Labelling and Information                       | 21   | 0.408 (-0.035, 0.851)          | 13   | 0.651 (-1.206, 2.509)          | 8    | 0.927 (-1.076, 2.930)   | 0  | -                        |
|                                                 |      | 0.070                          |      | 0.485                          |      | 0.351                   |    |                          |
| Screening                                       | 17   | 0.186 (-0.161, 0.532)          | 12   | 0.732 (-0.322, 1.787)          | 11   | 0.348 (-1.155, 1.851)   | 1  | 0.580 (-8.433, 9.592)    |
|                                                 |      | 0.288                          |      | 0.169                          |      | 0.639                   |    | 0.875                    |
| Financial Incentives                            | 14   | -0.082 (-0.427, 0.263)         | 11   | -0.060 (-1.230, 1.110)         | 4    | -1.961 (-4.212, 0.289)  | 2  | 3.217 (-2.220, 8.653)    |
|                                                 |      | 0.638                          |      | 0.919                          |      | 0.085                   |    | 0.189                    |
| Physical Activity                               | 32   | -0.048 (-0.274, 0.370)         | 28   | 0.209 (-0.611, 1.028)          | 17   | -0.266 (-1.541, 1.009)  | 7  | -1.647 (-5.540, 2.246)   |
|                                                 |      | 0.766                          |      | 0.611                          |      | 0.672                   |    | 0.326                    |
| Self Awareness                                  | 8    | -0.211 (-0.656, 0.233)         | 5    | <b>-1.860 (-3.617, -0.101)</b> | 5    | -1.802 (-3.896, 0.291)  | 0  | -                        |
|                                                 |      | 0.345                          |      | <b>0.039</b>                   |      | 0.089                   |    |                          |
| Other <sup>2</sup>                              | 30   | 0.205 (-0.089, 0.499)          | 25   | 0.231 (-0.623, 1.086)          | 14   | -0.245 (-1.472, 0.983)  | 8  | 1.450 (-2.698, 5.697)    |
|                                                 |      | 0.167                          |      | 0.589                          |      | 0.686                   |    | 0.401                    |
| Walt test (p value)*                            |      | 0.383*                         |      | 0.449*                         |      | 0.335*                  |    | 0.577*                   |
| <b>Target(s) of Intervention<sup>++</sup> ~</b> |      |                                |      |                                |      |                         |    |                          |
| Intercep                                        |      | -0.270 (-0.757, -0.216)        |      | -1.080 (-2.546, 0.385)         |      | -0.226 (-2.217, 1.765)  |    | -1.547 (-6.153, 3.058)   |
| Weight Loss                                     | 45   | -0.234 (-0.513, 0.045)         | 41   | -0.360 (-1.280, 0.559)         | 26   | 0.030 (-1.271, 1.331)   | 9  | -0.754 (-4.014, 2.506)   |
|                                                 |      | 0.098                          |      | 0.3436                         |      | 0.963                   |    | 0.613                    |
| Diet                                            | 53   | <b>-0.415 (-0.803, -0.026)</b> | 43   | -0.644 (-1.551, 0.262)         | 26   | -1.094 (-2.324, 0.136)  | 7  | 1.422 (-1.294, 4.138)    |
|                                                 |      | <b>0.037</b>                   |      | 0.160                          |      | 0.079                   |    | 0.266                    |
| Physical Activity                               | 53   | <b>0.579 (0.209, 0.949)</b>    | 45   | <b>1.036 (0.068, 2.004)</b>    | 30   | 1.100 (-2.541, 0.340)   | 13 | Drop due to collinearity |
|                                                 |      | <b>0.003</b>                   |      | <b>0.036</b>                   |      | 0.130                   |    |                          |
| Other <sup>3</sup>                              | 35   | 0.022 (-0.289, 0.245)          | 30   | -0.140 (-0.990, 0.710)         | 18   | 0.656 (-0.557, 1.868)   | 8  | 0.800 (-2.210, 3.809)    |
|                                                 |      | 0.870                          |      | 0.743                          |      | 0.279                   |    | 0.563                    |
| Walt test (p value)*                            |      | <b>0.020*</b>                  |      | 0.200*                         |      | 0.129*                  |    | 0.340*                   |

Abbreviations: body mass index (BMI); number of observations (n). <sup>1</sup> Mixed is defined as a combination of the pre-specified work type whereas, other differs from our pre-specified categories (e.g. a mixed worksite would be a company-wide WWP that targeted both white-collar executives as well as the blue-collar. <sup>2</sup> Other: components not included in previous groups, including employee advisory committees. <sup>3</sup> Other intervention targets included the reduction in CVD risk factors, smoking cessation, stress reduction, diabetes, or cancer prevention. <sup>+</sup> Age, sex, and number of components were introduced into the univariate meta-regression as continuous variables. <sup>++</sup> The categorical variables of design, location, type of worksite, quality score, duration, intervention components, and targets of intervention were coded into subgroup categories of dichotomous variables (0,1) and introduced coded into the meta-regressions. <sup>\*\*</sup> The reference, the variable omitted in the meta-regression. <sup>~</sup> Interventions had at least two components each and interventions may have had more than one target outcome. Due to this, multivariate meta-regression were performed for intervention components and targets of intervention

as the components or targets could not be analysed independently. In addition, N's will not sum to number of studies. \* Walt test was conducted for the univariate with 3 or more subgroup categories of dichotomous variables or multivariate models (intervention components and targets of intervention). The **bold** results indicate the significance of the univariate or multivariate (intervention components and targets of intervention) meta-regression based on an alpha of 0.05. Based on these results, multivariate meta-regression were performed (Results presented in Tables 9 and 10)

**Table S7. Univariate meta-regressions: Heterogeneity exploration for blood pressure and fasting glucose**

|                                                 | n    | DBP (mmHg)<br>β (95% CI)<br>p of uni-variate | n    | SBP (mmHg)<br>β (95% CI)<br>p of uni-variate   | n    | Fasting Glucose (mg/dL)<br>β (95% CI)<br>p of uni-variate   |
|-------------------------------------------------|------|----------------------------------------------|------|------------------------------------------------|------|-------------------------------------------------------------|
| <b>Overall estimate of intervention effects</b> | 41   | <b>-1.11 (-1.78,-0.44)</b><br><b>0.001</b>   | 41   | <b>-2.03 (-3.03,-0.78)</b><br><b>0.000</b>     | 26   | <b>-1.81 (-3.33,-0.28)</b><br><b>0.020</b>                  |
| <b>Age<sup>+</sup></b>                          |      |                                              |      |                                                |      |                                                             |
| Years                                           | 39   | -0.082 (-0.210, 0.045)<br>0.199              | 39   | -0.155 (-0.367, 0.057)<br>0.147                | 25   | 0.232 (-0.196, 0.660)<br>0.274                              |
| <b>Sex<sup>+</sup></b>                          |      |                                              |      |                                                |      |                                                             |
| % Males                                         | 39   | 0.014 (-0.015, 0.043)<br>0.336               | 39   | -0.014 (-0.061, 0.034)<br>0.569                | 24   | -0.015 (-0.100, 0.070)<br>0.724                             |
| <b>Number of Components<sup>+</sup></b>         | 41   | -0.223 (-0.537, 0.091)<br>0.158              | 41   | <b>-0.640 (-1.181, -0.099)</b><br><b>0.022</b> | 26   | 0.493 (-0.370, 1.356)<br>0.250                              |
| <b>Design<sup>++</sup></b>                      |      |                                              |      |                                                |      |                                                             |
| Randomised Intervention                         | 22** | -1.506 (-2.566, -0.447)<br>0.006             | 22** | -1.761 (-3.563, 0.041)<br>0.055                | 12   | -0.137 (-4.573, 4.299)<br>0.950                             |
| Non-Randomised Intervention                     | 19   | 0.779 (-0.718, 2.276)<br>0.299               | 19   | -0.584 (-3.184, 2.016)<br>0.652                | 14** | -1.927 (-4.919, 1.064)<br>0.196                             |
| <b>Location<sup>++</sup></b>                    |      |                                              |      |                                                |      |                                                             |
| North America (US & Canada)                     | 13   | -1.387 (-3.280, 0.506)<br>0.146              | 13   | -1.611 (-4.924, 1.702)<br>0.331                | 9    | 2.748 (-1.787, 7.282)<br>0.223                              |
| Europe, Australia, New Zealand                  | 14** | -0.324 (-1.701, 0.913)<br>0.546              | 14** | -1.412 (-3.634, 0.810)<br>0.017                | 4    | 5.808 (-0.593, 12.210)<br>0.073                             |
| Other (Asia, Latin America, Africa)             | 14   | -0.823 (-2.610, 0.965)<br>0.357<br>0.336*    | 14   | -0.470 (-3.553, 2.612)<br>0.482<br>0.609*      | 13** | -3.631 (-6.475, -0.787)<br>0.015<br>0.152*                  |
| Walt test (p value)*                            |      |                                              |      |                                                |      |                                                             |
| <b>Type of Workplace<sup>++</sup></b>           |      |                                              |      |                                                |      |                                                             |
| Office                                          | 11   | -0.797 (-2.790, 1.196)<br>0.423              | 11   | 1.667 (-1.713, 5.046)<br>0.324                 | 10** | -3.788 (-6.636, -0.939)<br>0.012                            |
| Hospital                                        | 6    | -1.414 (-4.134, 1.306)<br>0.299              | 6    | 1.587 (-3.020, 6.194)<br>0.489                 | 3    | 2.977 (-3.375, 9.329)<br>0.341                              |
| School                                          | 1    | 0.194 (-5.123, 5.512)<br>0.941               | 1    | 3.746 (-5.035, 12.527)<br>0.393                | 1    | 3.628 (-4.812, 12.068)<br>0.382                             |
| Factory                                         | 13** | -0.684 (-2.040, 0.671)<br>0.313              | 13** | -2.926 (-5.244, -0.608)<br>0.015               | 2    | -5.795 (-12.508, 0.918)<br>0.087                            |
| Mixed and Other <sup>1</sup>                    | 10   | -0.235 (-2.297, 1.828)<br>0.819<br>0.696*    | 10   | 0.530 (-3.001, 4.061)<br>0.763<br>0.753*       | 10   | <b>5.328 (1.205, 9.451)</b><br><b>0.014</b><br><b>0.010</b> |
| Walt test (p value)*                            |      |                                              |      |                                                |      |                                                             |
| <b>Quality Score<sup>++</sup></b>               |      |                                              |      |                                                |      |                                                             |
| 0-3                                             | 27** | -0.732 (-1.607, 0.142)<br>0.098              | 27** | -1.493 (-3.070, 0.085)<br>0.063                | 20** | -0.774 (-3.063, 1.516)<br>0.492                             |
| 4-5                                             | 14   | -1.303 (-2.914, 0.308)<br>0.110              | 14   | -1.631 (-4.354, 1.093)<br>0.233                | 6    | <b>-5.195 (-10.019, -0.370)</b><br><b>0.036</b>             |
| <b>Duration<sup>++</sup></b>                    |      |                                              |      |                                                |      |                                                             |
| 0-5 Months                                      | 15   | -0.393 (-2.211, 1.425)                       | 15   | 0.641 (-2.315, 3.597)                          | 8    | -1.324 (-6.741, 4.092)                                      |

|                                                 |      |                                 |      |                                         |      |                                  |
|-------------------------------------------------|------|---------------------------------|------|-----------------------------------------|------|----------------------------------|
| 6-12 Months                                     | 17** | 0.664<br>-0.943 (-2.168, 0.283) | 17** | 0.663<br>-1.885 (-3.868, 0.097)         | 10** | 0.617<br>-2.298 (-5.953, 1.358)  |
| 13-23 Months                                    | 1    | 0.128<br>1.443 (-3.047, 5.933)  | 1    | 0.062<br>2.085 (-5.610, 9.781)          | 1    | 0.206<br>3.698 (-8.591, 15.986)  |
| 24+ Months                                      | 8    | 0.519<br>-0.410 (-2.440, 1.619) | 8    | 0.586<br>-2.092 (-5.532, 1.349)         | 7    | 0.539<br>2.090 (-3.494, 7.673)   |
| Walt test (p value)*                            |      | 0.684<br>0.836*                 |      | 0.226<br>0.421*                         |      | 0.446<br>0.607*                  |
| <b>Intervention Components<sup>++</sup> ~</b>   |      |                                 |      |                                         |      |                                  |
| Intercep                                        |      | 0.921 (-1.166, 3.009)           |      | 2.782 (-0.169, 5.732)                   |      | -4.485 (-14.111, 5.140)          |
| Individual Education                            | 29   | -1.712 (-3.471, 0.047)          | 29   | <b>-3.707 (-6.115, -1.299)</b>          | 22   | 2.945 (-5.106, 10.996)           |
| Group Education                                 | 25   | 0.056<br>-1.050 (-2.668, 0.568) | 25   | <b>0.004</b><br>-1.908 (-4.108, 0.292)  | 13   | 0.449<br>-1.801 (-7.485, 3.883)  |
| Food Environment                                | 10   | 0.195<br>-1.949 (-4.158, 0.260) | 10   | 0.087<br><b>-4.584 (-7.767, -1.401)</b> | 7    | 0.511<br>-0.946 (-11.404, 9.513) |
| Labelling and Information                       | 8    | 0.082<br>1.211 (-1.197, 3.619)  | 8    | <b>0.006</b><br>-1.883 (-5.337, 1.571)  | 4    | 0.850<br>1.006 (-12.251, 14.263) |
| Screening                                       | 13   | 0.313<br>0.289 (-1.545, 2.124)  | 13   | 0.275<br>-1.117 (-3.557, 1.324)         | 6    | 0.874<br>3.722 (-2.956, 10.400)  |
| Financial Incentives                            | 9    | 0.750<br>1.645 (-0.300, 3.590)  | 9    | 0.358<br>2.528 (-0.224, 5.281)          | 2    | 0.255<br>3.869 (-8.565, 16.303)  |
| Physical Activity                               | 20   | 0.095<br>-0.909 (-2.561, 0.743) | 20   | 0.070<br>-0.596 (-2.842, 1.650)         | 16   | 0.519<br>2.347 (-4.399, 9.093)   |
| Self Awareness                                  | 5    | 0.270<br>0.708 (-1.632, 3.048)  | 5    | 0.592<br>-1.660 (-4.910, 1.591)         | 5    | 0.472<br>-1.347 (-8.876, 6.181)  |
| Other <sup>2</sup>                              | 20   | 0.542<br>-0.087 (-1.565, 1.390) | 20   | 0.306<br>1.716 (-0.318, 3.750)          | 13   | 0.709<br>-3.118 (-10.805, 4.570) |
| Walt test (p value)*                            |      | 0.905<br>0.116*                 |      | 0.095<br><b>0.001*</b>                  |      | 0.403<br>0.850*                  |
| <b>Target(s) of Intervention<sup>++</sup> ~</b> |      |                                 |      |                                         |      |                                  |
| Intercep                                        |      | -0.556 (-3.382, 2.270)          |      | -1.254 (-6.033, 3.525)                  |      | -1.849 (-12.186, 8.487)          |
| Weight Loss                                     | 24   | 0.149 (-1.687, 1.984)           | 24   | -0.747 (-3.816, 2.322)                  | 16   | 2.710 (-2.397, 7.817)            |
| Diet                                            | 33   | 0.870<br>-0.226 (-2.654, 2.201) | 33   | 0.624<br>-1.757 (-5.706, 2.191)         | 19   | 0.282<br>-5.107 (-10.604, 0.391) |
| Physical Activity                               | 32   | 0.851<br>-0.403 (-2.574, 1.767) | 32   | 0.373<br>1.494 (-2.114, 5.103)          | 23   | 0.067<br>1.956 (-5.647, 9.558)   |
| Other <sup>3</sup>                              | 27   | 0.709<br>-0.219 (-2.031, 1.593) | 27   | 0.407<br>-0.189 (-3.301, 2.929)         | 16   | 0.598<br>0.088 (-5.448, 5.625)   |
| Walt test (p value)*                            |      | 0.808<br>0.984*                 |      | 0.903<br>0.764*                         |      | 0.974<br>0.288*                  |

Abbreviations: diastolic blood pressure (DBP); systolic blood pressure (SBP); number of observations (n). <sup>1</sup> Mixed is defined as a combination of the pre-specified work type whereas, other differs from our pre-specified categories (e.g. a mixed worksite would be a company-wide WWP that targeted both white-collar executives as well as the blue-collar. <sup>2</sup> Other: components not included in previous groups, including employee advisory committees. <sup>3</sup> Other intervention targets included the reduction in CVD risk factors, smoking cessation, stress reduction, diabetes, or cancer prevention. <sup>+</sup> Age, sex, and number of components were introduced into the univariate meta-regression as continuous variables. <sup>++</sup> The categorical variables of design, location, type of worksite, quality score, duration, intervention components, and targets of intervention were coded into subgroup categories of dichotomous variables (0,1) and introduced coded into the meta-regressions. **\*\*** The reference, the variable omitted in the meta-regression. ~ Interventions had at

least two components each and interventions may have had more than one target outcome. Due to this, multivariate meta-regression were performed for intervention components and targets of intervention as the components or targets could not be analysed independently. In addition, N's will not sum to number of studies. \* Walt test was conducted for the univariate with 3 or more subgroup categories of dichotomous variables or multivariate models (intervention components and targets of intervention). The **bold** results indicate the significance of the univariate or multivariate (intervention components and targets of intervention) meta-regression based on an alpha of 0.05. Based on these results, multivariate meta-regression were performed (Results presented in Tables 9 and 10).

**Table S8. Univariate meta-regressions: Heterogeneity exploration for plasma lipids**

|                                                 | n    | HDL (mg/dL)<br>β (95% CI)<br>p of uni-variate | n    | LDL (mg/dL)<br>β (95% CI)<br>p of uni-variate   | n    | Triglycerides (mg/dL)<br>β (95% CI)<br>p of uni-variate | n    | Total Cholesterol (mg/dL)<br>β (95% CI)<br>p of uni-variate |
|-------------------------------------------------|------|-----------------------------------------------|------|-------------------------------------------------|------|---------------------------------------------------------|------|-------------------------------------------------------------|
| <b>Overall estimate of intervention effects</b> | 32   | <b>1.11 (0.48, 1.74)</b><br><b>0.001</b>      | 22   | <b>-5.18 (-7.83, -2.53)</b><br><b>0.000</b>     | 26   | <b>-5.38 (-9.18, -1.56)</b><br><b>0.005</b>             | 36   | <b>-1.75 (-2.59, -0.91)</b><br><b>0.000</b>                 |
| <b>Age<sup>+</sup></b>                          | 31   | -0.098 (-0.339, 0.142)<br>0.410               | 21   | -0.207 (-0.623, 0.208)<br>0.310                 | 25   | 0.146 (-0.0907, 1.199)<br>0.777                         | 24   | -0.232 (-0.672, 0.207)<br>0.289                             |
| <b>Sex<sup>+</sup></b>                          |      |                                               |      |                                                 |      |                                                         |      |                                                             |
| % Males                                         | 30   | -0.013 (-0.062, 0.035)<br>0.579               | 20   | 0.040 (-0.059, 0.139)<br>0.406                  | 24   | 0.141 (-0.987, 0.371)<br>0.213                          | 35   | 0.027 (-0.060, 0.114)<br>0.530                              |
| <b>Number of Components<sup>+</sup></b>         | 32   | -0.045 (-0.854, 0.764)<br>0.910               | 26   | -0.473 (-1.892, 0.945)<br>0.494                 | 26   | 1.938 (-0.465, 4.341)<br>0.109                          | 36   | 0.019 (-0.900, 0.938)<br>0.966                              |
| <b>Design<sup>++</sup></b>                      |      |                                               |      |                                                 |      |                                                         |      |                                                             |
| Randomised Intervention                         | 15   | -1.222 (-3.938, 1.494)<br>0.366               | 11** | -5.859 (-9.850, -1.868)<br>0.006                | 12   | 4.033 (-7.238, 15.303)<br>0.467                         | 17   | -1.958 (-6.718, 2.802)<br>0.409                             |
| Non-Randomised Intervention                     | 17** | 1.602 (-0.193, 3.397)<br>0.078                | 11   | 1.346 (-4.235, 6.926)<br>0.620                  | 14*  | -7.483 (-14.408, -0.558)<br>0.035                       | 19** | -2.535 (-5.697, 0.628)<br>0.113                             |
| <b>Location<sup>++</sup></b>                    |      |                                               |      |                                                 |      |                                                         |      |                                                             |
| North America (US & Canada)                     | 8    | -1.488 (-5.035, 2.058)<br>0.398               | 6    | -6.102 (-12.274, 0.070)<br>0.052                | 7    | -0.065 (-15.345, 15.215)<br>0.993                       | 14** | -2.944 (-6.961, 1.074)<br>0.146                             |
| Europe, Australia, New Zealand                  | 8    | -0.509 (-3.937, 2.920)<br>0.764               | 6    | <b>-6.962 (-12.823, -1.101)</b><br><b>0.022</b> | 5    | 1.961 (-13.523, 17.446)<br>0.796                        | 9    | -1.361 (-7.625, 4.902)<br>0.661                             |
| Other (Asia, Latin America, Africa)             | 16** | 1.490 (-0.363, 3.343)<br>0.111                | 10** | -1.888 (-5.278, 1.501)<br>0.258                 | 14** | -6.680 (-14.296, 0.936)<br>0.083                        | 13   | -0.323 (-5.941, 5.295)<br>0.908                             |
| Walt test (pvalue)*                             |      | 0.694*                                        |      | <b>0.036*</b>                                   |      | 0.964*                                                  |      | 0.903*                                                      |
| <b>Type of Workplace<sup>++</sup></b>           |      |                                               |      |                                                 |      |                                                         |      |                                                             |
| Office                                          | 11** | 2.341 (-0.042, 4.721)<br>0.054                | 8**  | -5.588 (-10.003, -1.172)<br>0.016               | 10** | -14.224 (-23.162, -5.286)<br>0.003                      | 9    | -1.102 (-7.455, 5.252)<br>0.726                             |
| Hospital                                        | 4    | -2.878 (-8.083, 2.326)<br>0.266               | 3    | -5.310 (-15.166, 4.545)<br>0.271                | 4    | 11.172 (-8.660, 31.003)<br>0.255                        | 5    | -4.721 (-13.687, 4.245)<br>0.291                            |
| School                                          | 1    | -2.380 (-9.937, 5.176)<br>0.523               | 1    | 5.678 (-5.390, 16.746)<br>0.294                 | 1    | -14.094 (-6.812, 35.000)<br>0.176                       | 1    | 2.409 (-10.884, 15.703)<br>0.714                            |
| Factory                                         | 6    | -1.631 (-5.486, 2.225)<br>0.393               | 3    | 0.784 (-7.500, 9.068)<br>0.844                  | 3    | -15.317 (-2.247, 32.881)<br>0.084                       | 7    | -1.998 (-8.508, 4.513)<br>0.536                             |
| Mixed and Other <sup>†</sup>                    | 10   | -1.903 (-5.412, 1.606)<br>0.276               | 7    | 1.392 (-5.194, 7.978)<br>0.661                  | 8    | -11.807 (-0.652, 24.265)<br>0.062                       | 14** | -2.404 (-6.173, 1.364)<br>0.203                             |
| Walt test (pvalue)*                             |      | 0.577*                                        |      | 0.578*                                          |      | 0.176*                                                  |      | 0.732*                                                      |
| <b>Quality Score<sup>++</sup></b>               |      |                                               |      |                                                 |      |                                                         |      |                                                             |
| 0-3                                             | 22** | 1.630 (0.059, 3.201)<br>0.042                 | 16** | -4.799 (-8.013, -1.584)<br>0.005                | 19** | -7.102 (-13.216, -0.987)<br>0.025                       | 21** | -3.212 (-6.257, -0.167)<br>0.039                            |
| 4-5                                             | 10   | -1.891 (-4.787, 1.004)<br>0.192               | 6    | -1.604 (-8.230, 5.022)<br>0.619                 | 7    | 5.594 (-8.298, 19.486)<br>0.414                         | 15   | -0.492 (-5.398, 4.413)<br>0.840                             |
| <b>Duration<sup>++</sup></b>                    |      |                                               |      |                                                 |      |                                                         |      |                                                             |



|                                                 |      |                              |      |                                  |      |                                  |      |                              |
|-------------------------------------------------|------|------------------------------|------|----------------------------------|------|----------------------------------|------|------------------------------|
| 0-5 Months                                      | 11   | -0.686 (-4.042, 2.669)       | 7    | 2.545 (-3.793, 8.882)            | 9    | <b>-15.545 (-26.739, -4.350)</b> | 9    | 0.663 (-5.921, 7.246)        |
|                                                 |      | 0.678                        |      | 0.411                            |      | <b>0.009</b>                     |      | 0.839                        |
| 6-12 Months                                     | 13** | 1.701 (-0.549, 3.951)        | 11** | -6.864 (-10.747, -2.982)         | 12** | -1.383 (-7.977, 5.211)           | 14** | -4.095 (-8.116, -0.074)      |
|                                                 |      | 0.133                        |      | 0.002                            |      | 0.668                            |      | 0.046                        |
| 13-23 Months                                    | 1    | -2.001 (-9.865, 5.862)       | 0    | -                                | 0    | -                                | 2    | 5.210 (-5.373, 15.792)       |
|                                                 |      | 0.606                        |      |                                  |      |                                  |      | 0.324                        |
| 24+ Months                                      | 7    | -1.403 (-5.014, 2.208)       | 4    | 4.699 (-2.538, 11.936)           | 5    | -0.956 (-11.672, 9.760)          | 11   | 0.590 (-5.157, 6.338)        |
|                                                 |      | 0.433                        |      | 0.190                            |      | 0.855                            |      | 0.836                        |
| Walt test (pvalue)*                             |      | 0.853*                       |      | 0.383*                           |      | <b>0.022*</b>                    |      | 0.799*                       |
| <b>Intervention Components<sup>++</sup> ~</b>   |      |                              |      |                                  |      |                                  |      |                              |
| Intercep                                        |      | 4.584 (0.798, 8.370)         |      | -4.005 (-9.752, 1.751)           |      | -25.138 (-46.272, -4.003)        |      | -5.039 (-13.188, 3.110)      |
| Individual Education                            | 22   | -2.633 (-5.684, 0.418)       | 15   | -0.061 (-5.015, 4.894)           | 19   | 13.533 (-5.484, 32.551)          | 27   | -0.549 (-6.577, 5.478)       |
|                                                 |      | 0.087                        |      | 0.979                            |      | 0.151                            |      | 0.853                        |
| Group Education                                 | 19   | -0.172 (-2.877, 2.532)       | 14   | -0.134 (-4.806, 4.538)           | 16   | 0.753 (-13.690, 15.196)          | 21   | -2.460 (-8.145, 3.439)       |
|                                                 |      | 0.896                        |      | 0.951                            |      | 0.913                            |      | 0.382                        |
| Food Environment                                | 4    | <b>6.049 (1.415, 10.682)</b> | 3    | <b>-16.619 (-25.731, -7.732)</b> | 4    | -2.424 (-29.563, 24.715)         | 9    | -5.253 (-13.944, 3.439)      |
|                                                 |      | <b>0.013</b>                 |      | <b>0.002</b>                     |      | 0.852                            |      | 0.225                        |
| Labelling and Information                       | 3    | -0.558 (-5.080, 3.963)       | 1    | -6.892 (-17.517, 3.732)          | 1    | 13.742 (-30.7441, 58.227)        | 8    | 4.504 (-4.623, 13.630)       |
|                                                 |      | 0.800                        |      | 0.183                            |      | 0.522                            |      | 0.320                        |
| Screening                                       | 13   | -2.577 (-5.641, 0.488)       | 9    | -1.526 (-6.388, 3.336)           | 9    | 10.754 (-8.499, 30.007)          | 16   | 3.873 (-1.550, 9.295)        |
|                                                 |      | 0.095                        |      | 0.507                            |      | 0.254                            |      | 0.154                        |
| Financial Incentives                            | 3    | 1.807 (-2.953, 6.568)        | 2    | 7.165 (-1.795, 16.125)           | 2    | 2.645 (-29.923, 35.213)          | 3    | 3.383 (-6.776, 13.542)       |
|                                                 |      | 0.439                        |      | 0.107                            |      | 0.865                            |      | 0.500                        |
| Physical Activity                               | 16   | -0.265 (-3.090, 2.560)       | 10   | 4.091 (-1.137, 9.319)            | 14   | 1.918 (-15.417, 19.252)          | 17   | 1.879 (-6.778, 7.895)        |
|                                                 |      | 0.848                        |      | 0.114                            |      | 0.818                            |      | 0.527                        |
| Self Awareness                                  | 6    | -0.212 (-3.421, 2.996)       | 5    | 2.023 (-3.233, 7.278)            | 5    | 2.718 (-15.872, 21.308)          | 6    | 0.559 (-6.778, 7.895)        |
|                                                 |      | 0.892                        |      | 0.418                            |      | 0.761                            |      | 0.877                        |
| Other <sup>2</sup>                              | 15   | -2.420 (-5.355, 0.515)       | 11   | -2.234 (-7.266, 2.797)           | 12   | 4.034 (-13.442, 21.509)          | 19   | 0.873 (-5.250, 6.998)        |
|                                                 |      | 0.101                        |      | 0.352                            |      | 0.631                            |      | 0.772                        |
| Walt test (pvalue)*                             |      | 0.186*                       |      | <b>0.019*</b>                    |      | 0.827*                           |      | 0.621*                       |
| <b>Target(s) of Intervention<sup>++</sup> ~</b> |      |                              |      |                                  |      |                                  |      |                              |
| Intercep                                        |      | 1.396 (-4.616, 7.408)        |      | -11.997 (-33.213, 9.218)         |      | -26.533 (-47.779, 5.287)         |      | -2.548 (-14.368, 9.272)      |
| Weight Loss                                     | 17   | -1.382 (-4.435, 1.580)       | 13   | 4.448 (-1.859, 10.755)           | 15   | 0.072 (-10.629, 10.773)          | 19   | <b>5.910 (0.874, 10.947)</b> |
|                                                 |      | 0.347                        |      | 0.155                            |      | 0.989                            |      | <b>0.023</b>                 |
| Diet                                            | 24   | 1.015 (-2.483, 4.514)        | 17   | -1.906 (-9.790, 5.977)           | 19   | 7.899 (-5.169, 20.966)           | 31   | 1.299 (-6.074, 8.673)        |
|                                                 |      | 0.556                        |      | 0.617                            |      | 0.223                            |      | 0.722                        |
| Physical Activity                               | 28   | 0.665 (-3.625, 4.956)        | 21   | 4.830 (-11.403, 21.063)          | 23   | 7.144 (-10.420, 24.708)          | 31   | -6.499 (-13.316, 0.318)      |
|                                                 |      | 0.753                        |      | 0.538                            |      | 0.407                            |      | 0.061                        |
| Other <sup>3</sup>                              | 21   | -1.392 (-4.664, 1.880)       | 13   | 1.456 (-5.422, 8.334)            | 17   | <b>13.908 (2.360, 25.456)</b>    | 25   | 0.408 (-5.029, 5.845)        |
|                                                 |      | 0.390                        |      | 0.661                            |      | <b>0.021</b>                     |      | 0.879                        |
| Walt test (pvalue)*                             |      | 0.723*                       |      | 0.618*                           |      | 0.16*                            |      | 0.114*                       |

Abbreviations: high density lipoprotein cholesterol (HDL); low density lipoprotein cholesterol (LDL); number of observations (n). <sup>1</sup>Mixed is defined as a combination of the pre-specified work type whereas, other differs from our pre-specified categories (e.g. a mixed worksite would be a company-wide WWP that targeted both white-collar executives as well as the blue-collar. <sup>2</sup> Other: components not included in previous groups, including employee advisory committees. <sup>3</sup> Other intervention targets included the reduction in CVD risk factors, smoking cessation, stress reduction, diabetes, or cancer prevention. <sup>+</sup> Age, sex, and number of components were introduced into the univariate meta-regression as continuous variables. <sup>++</sup> The categorical variables of design, location, type of worksite, quality score, duration, intervention components, and targets of intervention were coded into subgroup categories of dichotomous variables (0,1) and introduced coded into the meta-regressions. <sup>\*\*</sup> The reference, the variable omitted in the

meta-regression. ~ Interventions had at least two components each and interventions may have had more than one target outcome. Due to this, multivariate meta-regression were performed for intervention components and targets of intervention as the components or targets could not be analysed independently. In addition, N's will not sum to number of studies. \* Walt test was conducted for the univariate with 3 or more subgroup categories of dichotomous variables or multivariate models (intervention components and targets of intervention). The **bold** results indicate the significance of the univariate or multivariate (intervention components and targets of intervention) meta-regression based on an alpha of 0.05. Based on these results, multivariate meta-regression were performed (Results presented in Tables 9 and 10).

**Table S9. Multivariate meta-regressions: Dietary habits and anthropometric outcomes**

|                                                                     | <b>Fruits &amp; vegetables<br/>(serv/day)</b> | <b>Fruits (serv/day)</b>                 | <b>Vegetables (serv/day)</b>                | <b>Total Fat (% energy<br/>intake)</b>       | <b>BMI (kg/m<sup>2</sup>)</b>               | <b>Weight (kg)</b>                          |
|---------------------------------------------------------------------|-----------------------------------------------|------------------------------------------|---------------------------------------------|----------------------------------------------|---------------------------------------------|---------------------------------------------|
|                                                                     | $\beta$ (95% CI)<br>p of uni-variate          | $\beta$ (95% CI)<br>p of multi-variate   | $\beta$ (95% CI)<br>p multi-variate         | $\beta$ (95% CI)<br>p multi-variate          | $\beta$ (95% CI)<br>p multi-variate         | $\beta$ (95% CI)<br>p multi-variate         |
| <b>Overall estimate of intervention effects</b>                     | <b>0.27 (0.16, 0.37)</b><br><b>0.000</b>      | <b>0.20 (0.11, 0.28)</b><br><b>0.001</b> | 0.03 (-0.04, 0.10)<br>0.389                 | <b>- 1.18 (-1.78, -0.58)</b><br><b>0.000</b> | <b>-0.22 (-0.28, -0.17)</b><br><b>0.000</b> | <b>-0.92 (-1.11, -0.72)</b><br><b>0.000</b> |
| <b>Intercept</b>                                                    | 0.140 (-0.188, 0.468)<br>0.375                | 0.412 (0.195, 0.628)<br>0.002            | -0.087 (-0.128, -0.047)<br>0.001            | -0.580 (-3.622, 2.463)<br>0.680              | -0.473 (-0.799, -0.147)<br>0.005            | -0.994 (-1.975, -0.012)<br>0.047            |
| <b>Sex<sup>+</sup></b><br>% Males                                   |                                               |                                          |                                             | -0.014 (-0.045, 0.017)<br>0.323              |                                             |                                             |
| <b>Number of Components<sup>+</sup></b>                             |                                               | -0.048 (-0.075, -0.013)<br>0.010         |                                             |                                              |                                             |                                             |
| <b>Type of Workplace<sup>++</sup></b><br>Office                     |                                               | 3.336 (0.341, 6.330)<br>0.032            |                                             |                                              | -0.330 (-0.715, 0.055)<br>0.092             | -1.046 (-2.150, 0.058)<br>0.063             |
| Hospital                                                            |                                               |                                          |                                             |                                              |                                             |                                             |
| School                                                              |                                               |                                          |                                             |                                              |                                             |                                             |
| Factory                                                             |                                               |                                          |                                             |                                              |                                             |                                             |
| Mixed and Other <sup>1</sup>                                        |                                               |                                          |                                             |                                              |                                             |                                             |
| <b>Intervention Components<sup>++</sup></b><br>Individual Education |                                               |                                          |                                             |                                              |                                             | -1.010 (-1.906, -0.113)<br>0.028            |
| Group Education                                                     | 0.112 (-0.269, 0.493)<br>0.540                |                                          |                                             |                                              |                                             |                                             |
| Food Environment<br>Labelling and Information                       |                                               |                                          |                                             | -1.087 (-2.331, 0.158)<br>0.080              |                                             |                                             |
| Screening                                                           |                                               |                                          | <b>0.251 (0.130, 0.372)</b><br><b>0.001</b> |                                              |                                             |                                             |
| Financial Incentives                                                |                                               |                                          |                                             |                                              |                                             |                                             |
| Physical Activity                                                   |                                               |                                          |                                             | 0.625 (-1.287, 2.537)<br>0.483               |                                             |                                             |
| Self Awareness                                                      |                                               |                                          |                                             |                                              |                                             | 1.591 (-3.019, -0.164)<br>0.030             |
| Other <sup>2</sup>                                                  |                                               |                                          |                                             | -0.333 (-1.738, 1.072)<br>0.609              |                                             |                                             |
| <b>Target(s) of Intervention<sup>++</sup></b><br>Weight Loss        | -0.401 (-0.871, 0.069)<br>0.089               |                                          |                                             | 0.431 (-1.418, 2.281)<br>0.615               |                                             |                                             |
| Diet                                                                |                                               |                                          |                                             |                                              | -0.295 (-0.669, 0.079)<br>0.120             |                                             |
| Physical Activity                                                   | 0.375 (-0.101, 0.850)<br>0.113                |                                          |                                             |                                              | 0.552 (0.183, 0.922)<br>0.004               | -1.207 (0.321, 2.093)<br>0.008              |

|                    |                       |                      |                      |
|--------------------|-----------------------|----------------------|----------------------|
| Other <sup>3</sup> | 0.118 (-0.027, 0.264) | 0.038 (0.133, 0.208) | 1.894 (0.591, 3.197) |
|                    | 0.101                 | 0.636                | 0.009                |

---

Abbreviations: body mass index (BMI); servings/day (serv/day); number of observations (n). <sup>1</sup>Mixed is defined as a combination of the pre-specified work type whereas, other differs from our pre-specified categories (e.g. a mixed worksite would be a company-wide WWP that targeted both white-collar executives as well as the blue-collar). <sup>2</sup> Other: components not included in previous groups, including employee advisory committees. <sup>3</sup>Other intervention targets included the reduction in CVD risk factors, smoking cessation, stress reduction, diabetes, or cancer prevention. <sup>+</sup> Age, sex, and number of components were introduced into the univariate meta-regression as continuous variables. <sup>++</sup> The categorical variables of design, location, type of worksite, quality score, duration, intervention components, and targets of intervention were coded into subgroup categories of dichotomous variables (0,1) and introduced coded into the meta-regressions. To correct for the multiple comparisons, an alpha of 0.001 was used. Based on this, significant results are presented in **bold**.

**Table S10. Multivariate meta-regressions: Cardiometabolic risk factors**

|                                                 | <b>SBP (mmHg)</b><br>β (95% CI)<br>p multi-variate | <b>Fasting Glucose (mg/dL)</b><br>β (95% CI)<br>p multi-variate | <b>LDL (mg/dL)</b><br>β (95% CI)<br>p multi-variate | <b>Triglycerides (mg/dL)</b><br>β (95% CI)<br>p multi-variate |
|-------------------------------------------------|----------------------------------------------------|-----------------------------------------------------------------|-----------------------------------------------------|---------------------------------------------------------------|
| <b>Overall estimate of intervention effects</b> | <b>-2.03 (-3.03,-0.78)</b><br><b>0.000</b>         | <b>-1.81 (-3.33,-0.28)</b><br><b>0.020</b>                      | <b>-5.18 (-7.83, -2.53)</b><br><b>0.000</b>         | <b>-5.38 (-9.18, -1.56)</b><br><b>0.005</b>                   |
| <b>Intercept</b>                                | 1.347 (-1.338, 4.034)<br>0.316                     | -2.689 (-5.364, -0.014)<br>0.049                                | -1.946 (-4.137, 0.244)<br>0.078                     | -5.849 (-13.681, 1.982)<br>0.136                              |
| <b>Number of Components<sup>+</sup></b>         | -0.005 (-0.620, 0.609)<br>0.986                    |                                                                 |                                                     |                                                               |
| <b>Location<sup>++</sup></b>                    |                                                    |                                                                 |                                                     |                                                               |
| North America (US & Canada)                     |                                                    |                                                                 |                                                     |                                                               |
| Europe, Australia, New Zealand                  |                                                    |                                                                 | -6.217 (-10.482, -1.952)<br>0.007                   |                                                               |
| Other (Asia, Latin America, Africa)             |                                                    |                                                                 |                                                     |                                                               |
| <b>Type of Workplace<sup>++</sup></b>           |                                                    |                                                                 |                                                     |                                                               |
| Office                                          |                                                    |                                                                 |                                                     |                                                               |
| Hospital                                        |                                                    |                                                                 |                                                     |                                                               |
| School                                          |                                                    |                                                                 |                                                     |                                                               |
| Factory                                         |                                                    |                                                                 |                                                     |                                                               |
| Mixed and Other <sup>1</sup>                    |                                                    | 4.587 (0.603, 8.531)<br>0.025                                   |                                                     |                                                               |
| <b>Quality Score<sup>++</sup></b>               |                                                    |                                                                 |                                                     |                                                               |
| 0-3                                             |                                                    |                                                                 |                                                     |                                                               |
| 4-5                                             |                                                    | -3.912 (-8.472, 0.650)<br>0.089                                 |                                                     |                                                               |
| <b>Duration<sup>++</sup></b>                    |                                                    |                                                                 |                                                     |                                                               |
| 0-5 Months                                      |                                                    |                                                                 |                                                     | -12.058 (-22.357, -1.758)<br>0.024                            |
| 6-12 Months                                     |                                                    |                                                                 |                                                     |                                                               |
| 13-23 Months                                    |                                                    |                                                                 |                                                     |                                                               |
| 24+ Months                                      |                                                    |                                                                 |                                                     |                                                               |
| <b>Intervention Components<sup>++</sup></b>     |                                                    |                                                                 |                                                     |                                                               |
| Individual Education                            | -0.3.101 (-5.931, -0.270)<br>0.033                 |                                                                 |                                                     |                                                               |
| Group Education                                 |                                                    |                                                                 |                                                     |                                                               |
| Food Environment                                | -4.484 (-7.284, -1.683)<br>0.003                   |                                                                 | <b>-11.571 (-17.247, -5.894)</b><br><b>0.000</b>    |                                                               |
| Labelling and Information                       |                                                    |                                                                 |                                                     |                                                               |
| Screening                                       |                                                    |                                                                 |                                                     |                                                               |
| Financial Incentives                            |                                                    |                                                                 |                                                     |                                                               |
| Physical Activity                               |                                                    |                                                                 |                                                     |                                                               |
| Self Awareness                                  |                                                    |                                                                 |                                                     |                                                               |

Other<sup>2</sup>

**Target(s) of Intervention<sup>++</sup>**

Weight Loss

Diet

Physical Activity

Other<sup>3</sup>

5.835 (-3.050, 14.720)

0.187

---

Abbreviations: systolic blood pressure (SBP); low density lipoprotein cholesterol (LDL); number of observations (n). <sup>1</sup>Mixed is defined as a combination of the pre-specified work type whereas, other differs from our pre-specified categories (e.g. a mixed worksite would be a company-wide WWP that targeted both white-collar executives as well as the blue-collar. <sup>2</sup>Other: components not included in previous groups, including employee advisory committees. <sup>3</sup>Other intervention targets included the reduction in CVD risk factors, smoking cessation, stress reduction, diabetes, or cancer prevention. <sup>+</sup> Age, sex, and number of components were introduced into the univariate meta-regression as continuous variables. <sup>++</sup>The categorical variables of design, location, type of worksite, quality score, duration, intervention components, and targets of intervention were coded into subgroup categories of dichotomous variables (0,1) and introduced coded into the meta-regressions. To correct for the multiple comparisons, an alpha of 0.001 was used. Based on this, significant results are presented in **bold**.

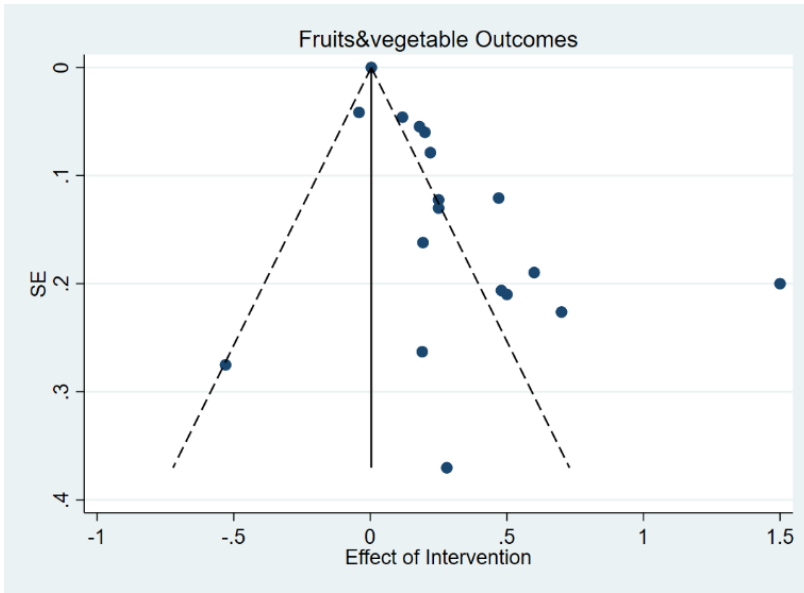

**Fig. S21. Funnel plot fruit and vegetable consumption**

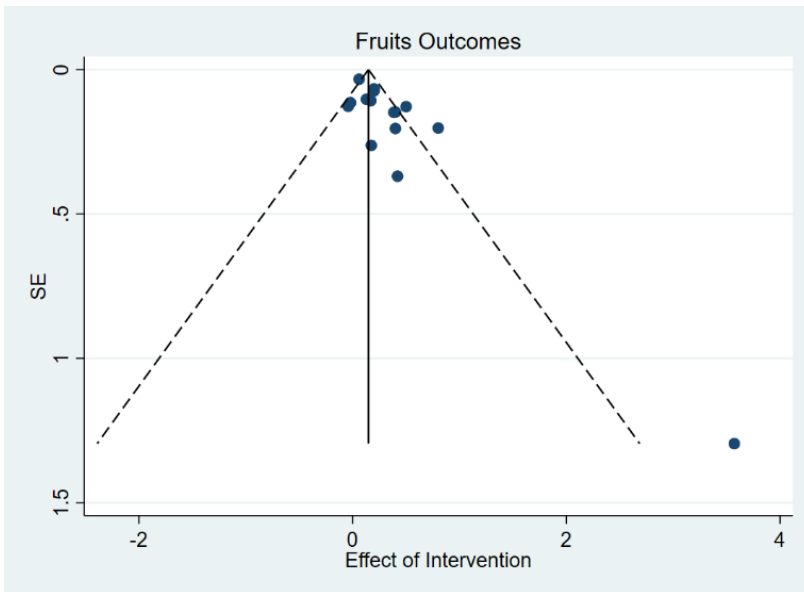

**Fig. S22. Funnel plot fruit intake**





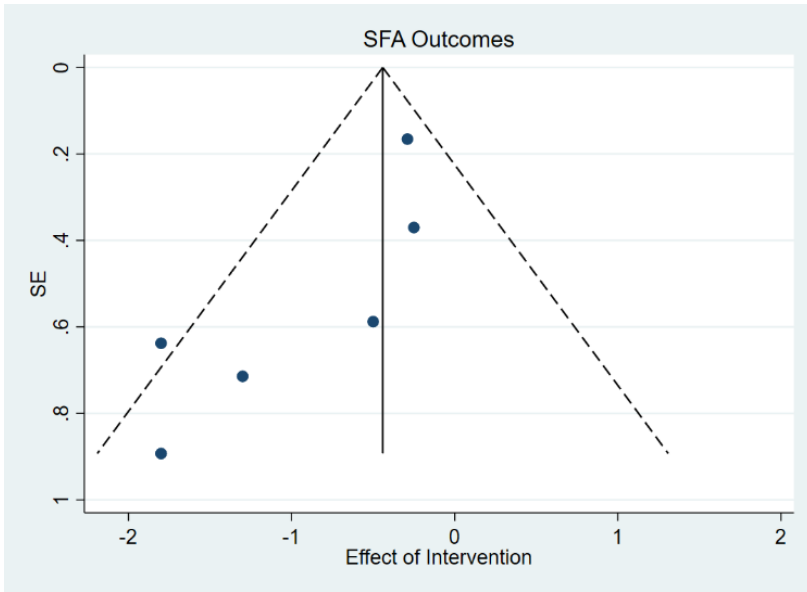

**Fig. S25. Funnel plot saturated fat intake**

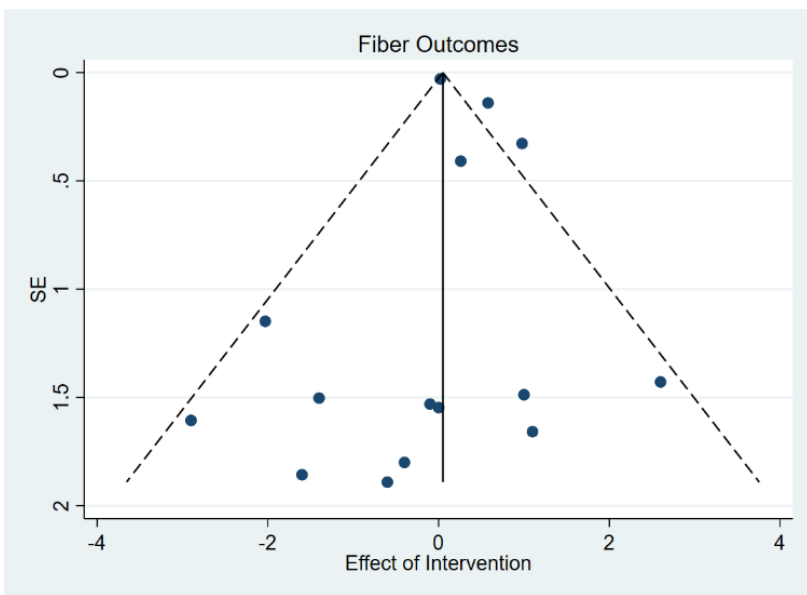

**Fig. S26. Funnel plot fibre intake**

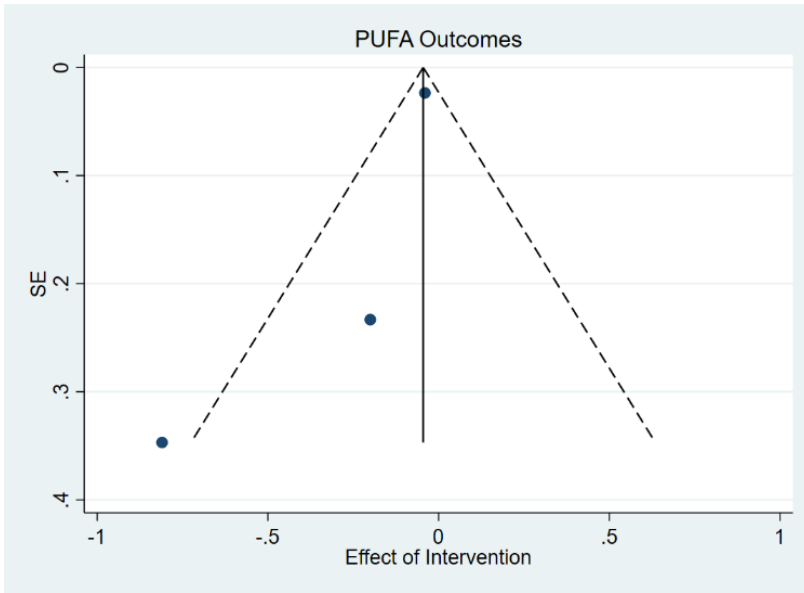

**Fig. S27. Funnel plot PUFA intake**

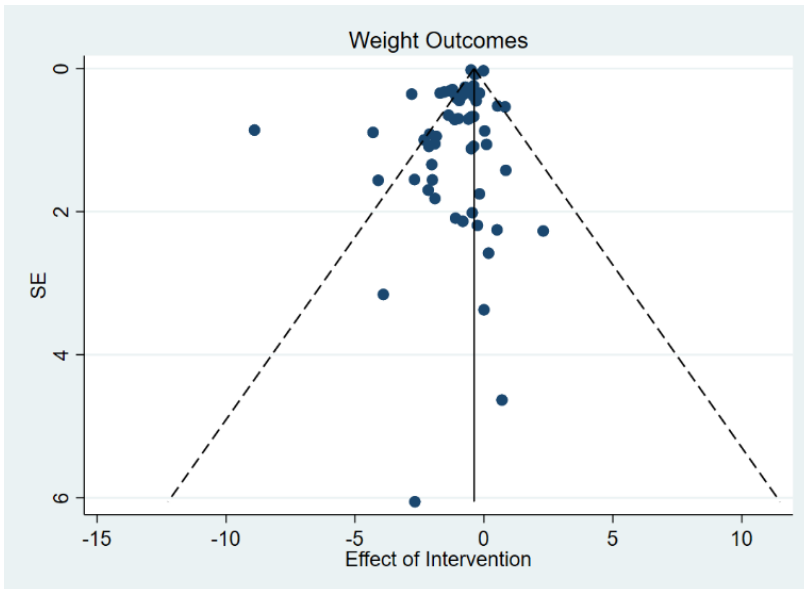

**Fig. S28. Funnel plot weight**

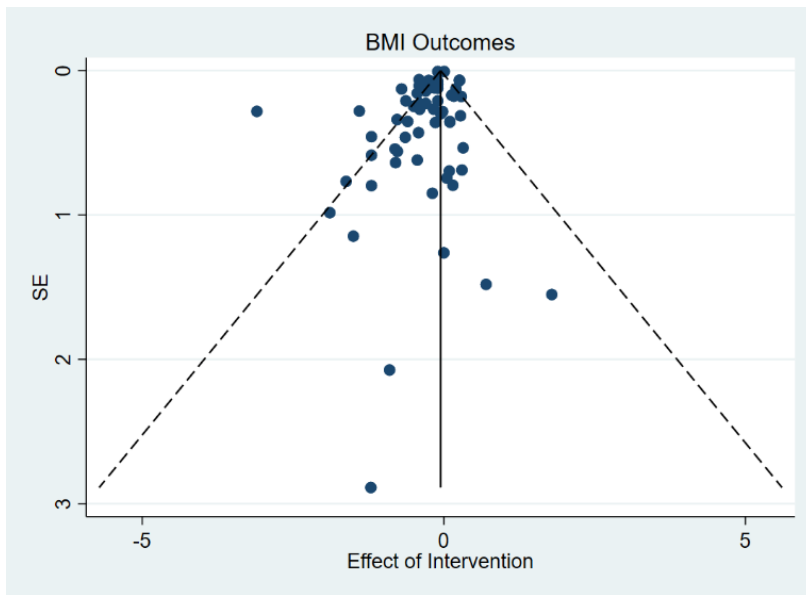

**Fig. S29. Funnel plot body mass index (BMI)**

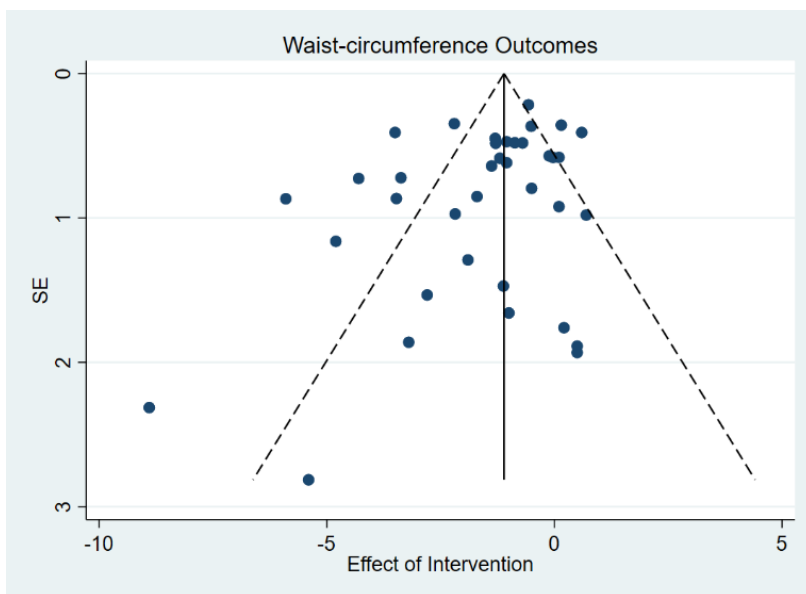

**Fig. S30. Funnel plot waist circumference**

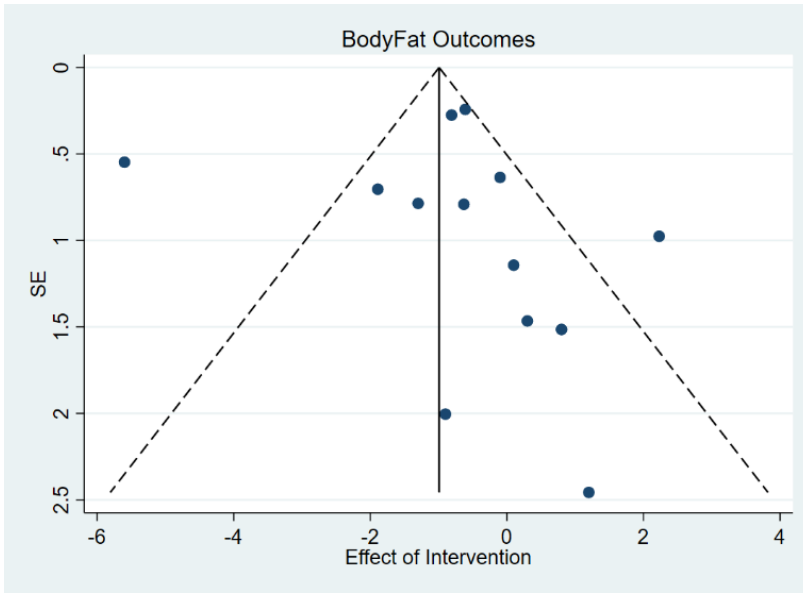

**Fig. S31. Funnel plot body fat %**

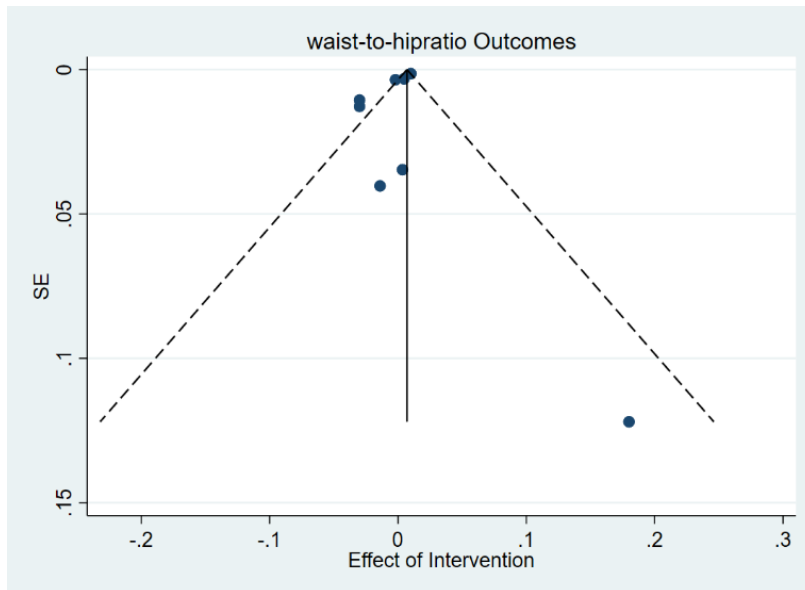

**Fig. S32. Funnel plot waist-to-hip ratio**

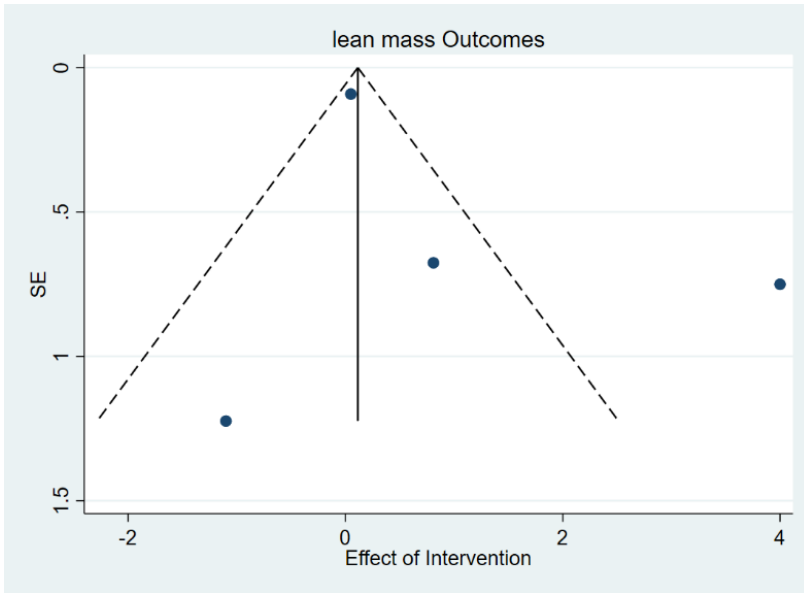

**Fig. S33. Funnel plot % lean mass**

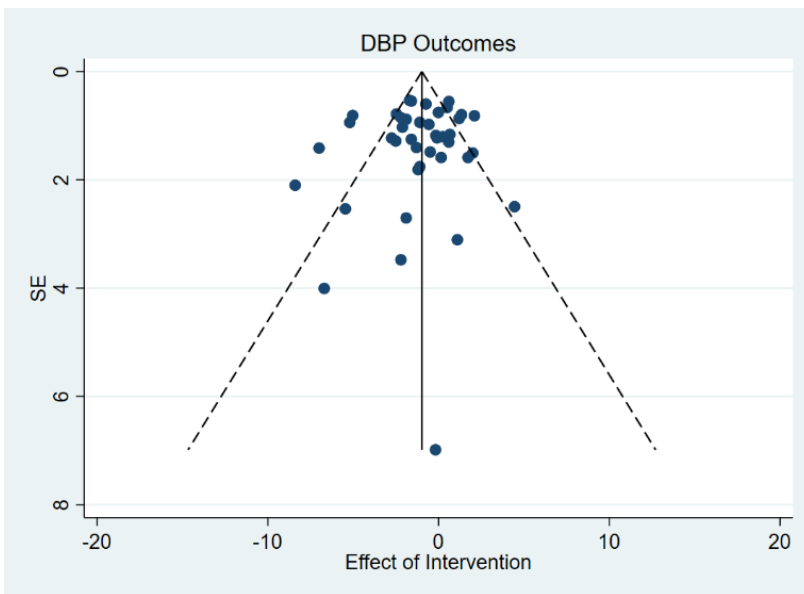

**Fig. S34. Funnel plot Diastolic blood pressure**

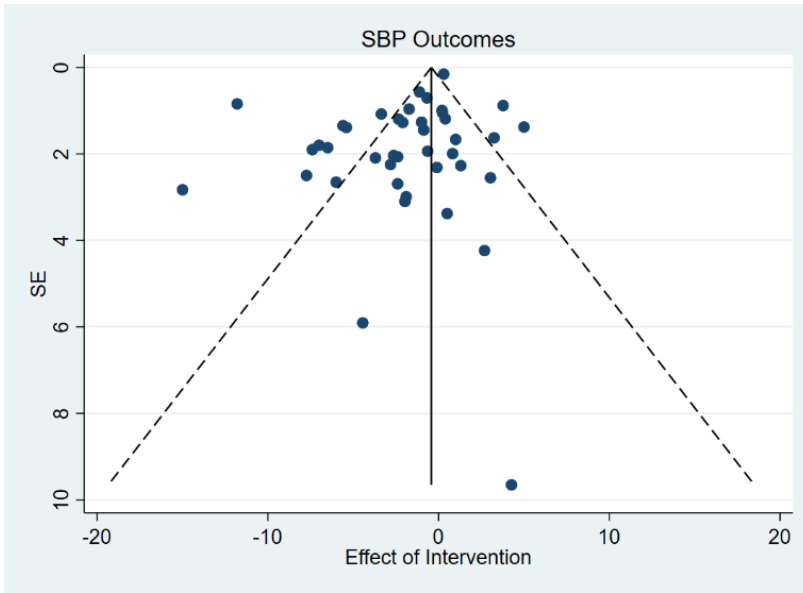

**Fig. S35. Funnel plot Systolic blood pressure**

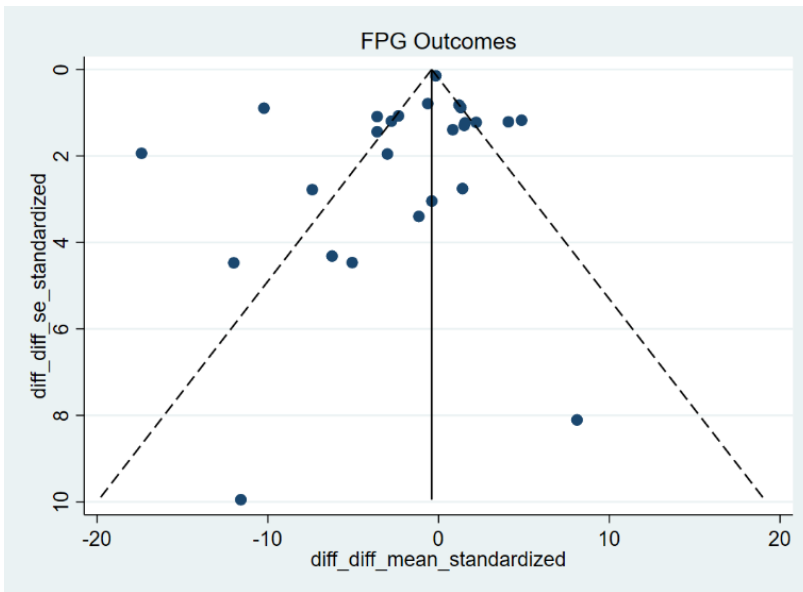

**Fig. S36. Funnel plot fasting plasma glucose**

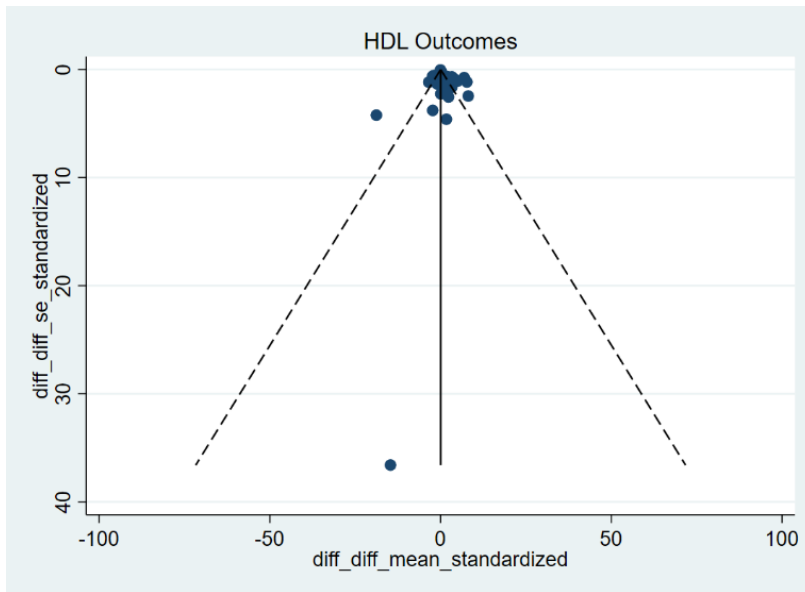

**Fig. S37. Funnel plot HDL-cholesterol**

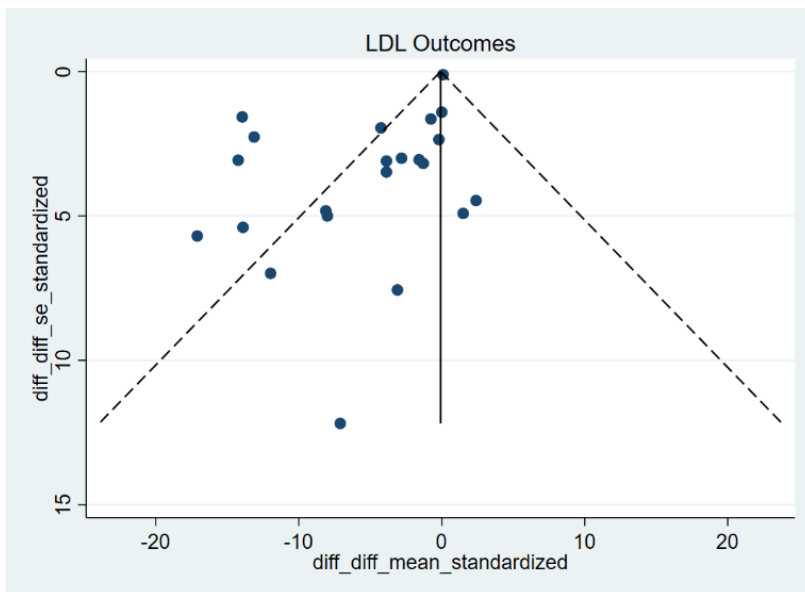

**Fig. S38. Funnel plot LDL-cholesterol**

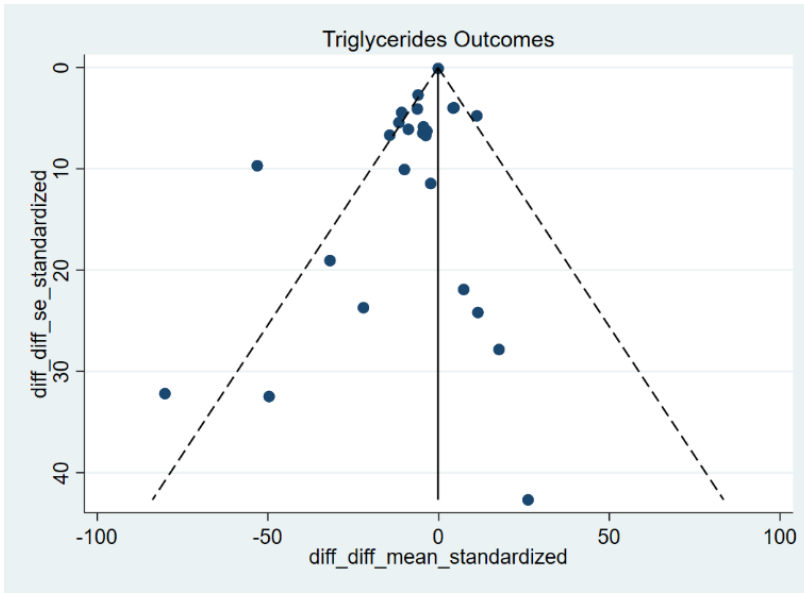

**Fig. S39. Funnel plot triglycerides**

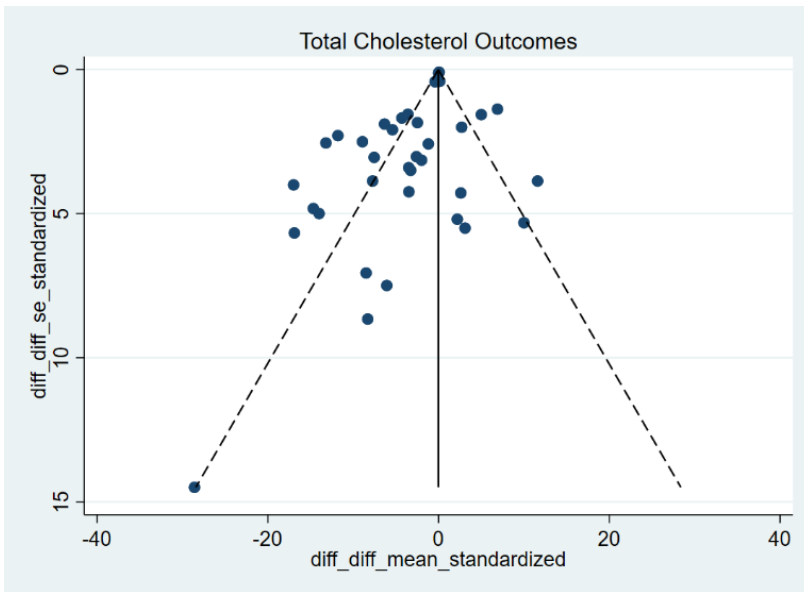

**Fig. S40. Funnel plot total cholesterol**



**Table S11. Assessment of small study effects by comparison between the observed vs corrected pooled effect sizes**

| Outcome, units                      | No. of Studies (No. of intervention groups) * | Observed pooled effect size <sup>++</sup><br>(95% CI) | No. imputed observations<br>** | No. total number of studies (observed + corrected)** | Corrected pooled effect size<br>(95% CI)** |
|-------------------------------------|-----------------------------------------------|-------------------------------------------------------|--------------------------------|------------------------------------------------------|--------------------------------------------|
| <b>Dietary Habits</b>               |                                               |                                                       |                                |                                                      |                                            |
| Fruits and vegetables, serv/d       | 16 (18)                                       | <b>0.27 (0.16, 0.37)</b>                              | 8                              | 26                                                   | 0.05 (-0.05, 0.16)                         |
| Fruits, serv/d                      | 13 (15)                                       | <b>0.20 (0.11, 0.28)</b>                              | 6                              | 21                                                   | <b>0.12 (0.11, 0.28)</b>                   |
| Vegetables, serv/d                  | 12 (14)                                       | 0.03 (-0.04, 0.10)                                    | 5                              | 19                                                   | -0.06 (-0.13, 0.02)                        |
| Saturated fat, % energy             | 4 (6)                                         | <b>-0.70 (-1.22, -0.19)</b>                           | 3                              | 9                                                    | -0.31 (-0.87, 0.25)                        |
| <b>Anthropometrics</b>              |                                               |                                                       |                                |                                                      |                                            |
| Body mass index, kg/m <sup>2</sup>  | 57 (67)                                       | <b>-0.22 (-0.28, -0.17)</b>                           | 19                             | 86                                                   | <b>-0.12 (-0.18, -0.06)</b>                |
| Body weight, kg                     | 47 (59)                                       | <b>-0.92 (-1.11, -0.72)</b>                           | 17                             | 76                                                   | <b>-0.52 (-0.72, -0.31)</b>                |
| <b>Cardiometabolic Risk Factors</b> |                                               |                                                       |                                |                                                      |                                            |
| SBP, mmHg                           | 34 (41)                                       | <b>-2.03 (-3.16, -0.89)</b>                           | 11                             | 52                                                   | -0.06 (-1.31, 1.20)                        |
| LDL cholesterol, mg/dL              | 20 (22)                                       | <b>-5.18 (-7.83, -2.53)</b>                           | 10                             | 32                                                   | -0.41 (-3.00, 2.18)                        |
| Triglycerides, mg/dL                | 23 (26)                                       | <b>-5.38 (-9.18, -1.59)</b>                           | 6                              | 32                                                   | -2.14 (-6.39, 2.11)                        |
| Total cholesterol, mg/dL            | 32 (36)                                       | <b>-1.75 (-2.59, -0.91)</b>                           | 11                             | 36                                                   | -0.30 (-1.20, 0.59)                        |

Abbreviations: systolic blood pressure (SBP); low density lipoprotein (LDL); Servings/day (serv/d). \*Some studies included more than 2 arms providing more than one intervention group per study<sup>++</sup> Observed pooled effect sizes were calculated using inverse-variance random-effects meta-analysis. \*\*Trim-and-fill method for correction of publication bias.

**Table S12. Sensitivity analysis for randomised controlled trials: Pooled estimates of the effect (change) of WWP on dietary habits, anthropometric measurements and clinical parameters**

| Outcome, units                      | No. of Studies ( No. of intervention groups ) | Primary specified target <sup>+</sup> (%) | Duration, months <sup>**</sup> | Pooled effect size <sup>++</sup> (95% CI) | I <sup>2</sup> , % | P asymmetry (Egger's Test) |
|-------------------------------------|-----------------------------------------------|-------------------------------------------|--------------------------------|-------------------------------------------|--------------------|----------------------------|
| <b>Dietary Habits</b>               |                                               |                                           |                                |                                           |                    |                            |
| Fruits and vegetables, serv/d       | 13 (15)                                       | 100% <sup>1</sup>                         | 16.8 ± 9.2                     | <b>0.34 (0.21, 0.47)</b>                  | 90.3               | <b>0.000</b>               |
| Fruits, serv/d                      | 11 (13)                                       | 100% <sup>1</sup>                         | 5.6 ± 5.3                      | <b>0.20 (0.12, 0.28)</b>                  | 53.6               | <b>0.013</b>               |
| Vegetables, serv/d                  | 8 (10)                                        | 100% <sup>1</sup>                         | 6.0 ± 5.9                      | 0.02 (-0.06, 0.10)                        | 78.7               | <b>0.012</b>               |
| Fibre, g/d                          | 6 (11)                                        | 100% <sup>1</sup>                         | 12.8 ± 7.5                     | 0.28 (-0.13, 0.70)                        | 65.9               | 0.660                      |
| Total Fats, % energy                | 10 (12)                                       | 100% <sup>1</sup>                         | 11.5 ± 8.2                     | <b>-1.09 (-1.79, -0.38)</b>               | 86.8               | 0.649                      |
| <b>Anthropometrics</b>              |                                               |                                           |                                |                                           |                    |                            |
| Body mass index, kg/m <sup>2</sup>  | 37 (41)                                       | 73% <sup>2,3</sup>                        | 11.4 ± 9.0                     | <b>-0.37 (-0.49, -0.24)</b>               | 84.7               | <b>0.008</b>               |
| Body weight, kg                     | 30 (35)                                       | 77% <sup>3</sup>                          | 6.8 ± 4.8                      | <b>-1.32 (-1.72, -0.92)</b>               | 79.6               | <b>0.005</b>               |
| Waist circumference, cm             | 17 (18)                                       | 83% <sup>3</sup>                          | 5.2 ± 2.5                      | <b>-1.31 (-1.88, -0.74)</b>               | 75                 | 0.130                      |
| Body fat, %                         | 9 (10)                                        | 100% <sup>3</sup>                         | 4.2 ± 2.3                      | -0.93 (-2.04, 0.18)                       | 90.1               | 0.983                      |
| Waist-to-hip, ratio                 | 6 (8)                                         | 88% <sup>4</sup>                          | 10.4 ± 12.6                    | -0.00 (-0.01, 0.00)                       | 79.8               | 0.172                      |
| Lean mass, kg                       | 4 (4)                                         | 100% <sup>3</sup>                         | 3.3 ± 0.5                      | 1.01 (-0.82, 2.83)                        | 89.8               | 0.449                      |
| <b>Cardiometabolic Risk Factors</b> |                                               |                                           |                                |                                           |                    |                            |
| SBP, mmHg                           | 20 (22)                                       | 82% <sup>4</sup>                          | 5.9 ± 4.0                      | <b>-1.50 (-2.59, -0.41)</b>               | 84.9               | <b>0.014</b>               |
| DBP, mmHg                           | 20 (22)                                       | 82% <sup>4</sup>                          | 5.9 ± 4.0                      | <b>-1.51 (-2.63, -0.39)</b>               | 76.8               | 0.826                      |
| Fasting glucose, mg/dL              | 12 (12)                                       | 83% <sup>3</sup>                          | 7.3 ± 4.7                      | -0.97 (-2.27, 0.33)                       | 62.6               | 0.132                      |
| HDL cholesterol, mg/dL              | 15 (15)                                       | 80% <sup>3</sup>                          | 6.6 ± 4.5                      | 0.58 (-0.74, 1.90)                        | 89.4               | 0.567                      |
| LDL cholesterol, mg/dL              | 11 (11)                                       | 91% <sup>3</sup>                          | 6.4 ± 3.4                      | <b>-5.97 (-10.63, -1.30)</b>              | 91.6               | <b>0.012</b>               |
| Triglycerides, mg/dL                | 12 (12)                                       | 83% <sup>3</sup>                          | 6.1 ± 3.5                      | -2.39 (-8.46, 3.69)                       | 56.8               | 0.260                      |
| Total cholesterol, mg/dL            | 17 (17)                                       | 88% <sup>4</sup>                          | 7.9 ± 5.8                      | <b>-1.00 (-1.81, -0.19)</b>               | 76.9               | <b>0.002</b>               |

Abbreviations: Diastolic blood pressure (DBP); systolic blood pressure (SBP); high density lipoprotein (HDL); low density lipoprotein (LDL); Servings/day (serv/d), Heterogeneity test (I<sup>2</sup>). \*Some studies included more than 2 intervention groups (intervention vs control). \*\*Duration, months is indicated by mean ± SD. Primary specified target indicates the most frequent, but not limited to, intervention focus per outcome identify subjectively by the investigators (Diet quality<sup>1</sup>, weight loss<sup>2</sup>, physical activity<sup>3</sup> and others<sup>4</sup> such as reduction in CVD risk factors, smoking cessation, stress reduction, diabetes or cancer prevention), for instance the primary specified target for the interventions reporting fruit intake was diet quality (93%) meaning diet quality was the most frequent target, but not exclusively as the intervention could also target physical activity or weight loss less frequently. ++ Pooled effect sizes were calculated using inverse-variance random-effects meta-analysis

**Table S13. Randomised controlled trials: Comparison between the observed vs corrected pooled effect sizes for publication bias**

| Outcome, units                      | No. of Studies ( No. of intervention groups ) * | Observed pooled effect size <sup>++</sup> (95% CI) | No. imputed observations ** | No. total number of studies (observed + corrected)** | Corrected pooled effect size (95% CI)** |
|-------------------------------------|-------------------------------------------------|----------------------------------------------------|-----------------------------|------------------------------------------------------|-----------------------------------------|
| <b>Dietary Habits</b>               |                                                 |                                                    |                             |                                                      |                                         |
| Fruits and vegetables, serv/d       | 13 (15)                                         | <b>0.34 (0.21, 0.47)</b>                           | 8                           | 23                                                   | 0.06 (-0.06, 0.19)                      |
| Fruits, serv/d                      | 11(13)                                          | <b>0.20 (0.12, 0.28)</b>                           | 6                           | 19                                                   | <b>0.12 (0.03, 0.20)</b>                |
| Vegetables, serv/d                  | 8 (10)                                          | 0.02 (-0.06, 0.10)                                 | 3                           | 13                                                   | -0.05 (-0.14, 0.04)                     |
| <b>Anthropometrics</b>              |                                                 |                                                    |                             |                                                      |                                         |
| Body mass index, kg/m <sup>2</sup>  | 37 (41)                                         | <b>-0.37 (-0.49, -0.24)</b>                        | 12                          | 53                                                   | <b>-0.16 (-0.29, -0.02)</b>             |
| Body weight, kg                     | 30 (35)                                         | <b>-1.32 (-1.72, -0.92)</b>                        | 10                          | 45                                                   | <b>-0.73 (-1.18, -0.29)</b>             |
| <b>Cardiometabolic Risk Factors</b> |                                                 |                                                    |                             |                                                      |                                         |
| SBP, mmHg                           | 20 (22)                                         | <b>-1.50 (-2.59, -0.41)</b>                        | 6                           | 28                                                   | -0.10 (-1.29, 1.10)                     |
| LDL cholesterol, mg/dL              | 11 (11)                                         | <b>-5.97 (-10.63, -1.30)</b>                       | 6                           | 17                                                   | -0.12 (-4.20, 3.96)                     |
| Total cholesterol, mg/dL            | 17 (17)                                         | <b>-1.00 (-1.81, -0.19)</b>                        | 7                           | 24                                                   | -0.25 (-1.22, 0.72)                     |

Abbreviations: systolic blood pressure (SBP); low density lipoprotein (LDL); Servings/day (serv/d). \* Some studies included more than 2 arms providing more than one intervention group<sup>++</sup> Observed pooled effect sizes were calculated using inverse-variance random-effects meta-analysis. \*\*Trim-and-fill method for correction of publication bias.

## References

1. Addley K, Boyd S, Kerr R, McQuillan P, Houdmont J, McCrory M. The impact of two workplace-based health risk appraisal interventions on employee lifestyle parameters, mental health and work ability: results of a randomized controlled trial. *Health Educ Res* 2014; **29**: 247-58.
2. Agarwal U, Mishra S, Xu J, Levin S, Gonzales J, Barnard ND. A multicenter randomized controlled trial of a nutrition intervention program in a multiethnic adult population in the corporate setting reduces depression and anxiety and improves quality of life: the GEICO study. *Am J Health Promot* 2015; **29**: 245-54.
3. Allen JC, Lewis JB, Tagliaferro AR. Cost-effectiveness of health risk reduction after lifestyle education in the small workplace. *Prev Chronic Dis* 2012; **9**: E96.
4. Almeida FA, You W, Harden SM, et al. Effectiveness of a Worksite-Based Weight Loss Randomized Controlled Trial: The Worksite Study. *Obesity* 2015; **23**: 737-45.
5. Atlantis E, Chow CM, Kirby A, Fiatarone Singh MA. Worksite intervention effects on physical health: a randomized controlled trial. *Health Promot Int* 2006; **21**: 191-200.
6. Balk-Møller NC, Poulsen SK, Larsen TM. Effect of a Nine-Month Web- and App-Based Workplace Intervention to Promote Healthy Lifestyle and Weight Loss for Employees in the Social Welfare and Health Care Sector: A Randomized Controlled Trial. *J Med Internet Res* 2017; **19**: e108.
7. Bandoni DH, Sarno F, Jaime PC. Impact of an intervention on the availability and consumption of fruits and vegetables in the workplace. *Public Health Nutr* 2011; **14**: 975-81.
8. Beresford SA, Thompson B, Feng Z, Christianson A, McLerran D, Patrick DL. Seattle 5 a Day worksite program to increase fruit and vegetable consumption. *Prev Med* 2001; **32**: 230-8.
9. Bhiri S, Maatoug J, Zammit N, et al. A 3-Year Workplace-Based Intervention Program to Control Noncommunicable Disease Risk Factors in Sousse, Tunisia. *J Occup Environ Med* 2015; **57**: e72-7.
10. Braeckman L, De Bacquer D, Maes L, De Backer G. Effects of a low-intensity worksite-based nutrition intervention. *Occup Med (Lond)* 1999; **49**: 549-55.
11. Campbell MK, Tessaro I, DeVellis B, et al. Effects of a tailored health promotion program for female blue-collar workers: health works for women. *Prev Med* 2002; **34**: 313-23.
12. Carr LJ, Leonhard C, Tucker S, Fethke N, Benzo R, Gerr F. Total Worker Health Intervention Increases Activity of Sedentary Workers. *Am J Prev Med* 2016; **50**: 9-17.
13. Cawley J, Price JA. Outcomes in a Program that Offers Financial Rewards for Weight Loss. National Bureau of Economic Research, Inc, NBER Working Papers: 14987; 2009.
14. Chen J, Wu X, Gu D. Hypertension and cardiovascular diseases intervention in the capital steel and iron company and Beijing Fangshan community. *Obes Rev* 2008; **9 Suppl 1**: 142-5.
15. Chen MM, Tsai AC, Wang JY. The effectiveness and barriers of implementing a workplace health promotion program to improve metabolic disorders in older workers in Taiwan. *Global health promotion* 2014; **23**: 6-14.
16. Choi YS, Song R, Ku BJ. Effects of a T'ai Chi-Based Health Promotion Program on Metabolic Syndrome Markers, Health Behaviors, and Quality of Life in Middle-Aged Male Office Workers: A Randomized Trial. *J Altern Complement Med* 2017; **23**: 949-56.
17. Cook C, Simmons G, Swinburn B, Stewart J. Changing risk behaviours for non-communicable disease in New Zealand working men--is workplace intervention effective? *N Z Med J* 2001; **114**: 175-8.
18. Danquah IH, Kloster S, Holtermann A, et al. Take a Stand!-a multi-component intervention aimed at reducing sitting time among office workers-a cluster randomized trial. *Int J Epidemiol* 2017; **46**: 128-40.
19. Doran K, Resnick B, Alghzawi H, Zhu S. The worksite heart health improvement project's impact on behavioral risk factors for cardiovascular disease in long-term care: A randomized control trial. *Int J Nurs Stud* 2018; **86**: 107-14.
20. Doran K, Resnick B, Zhu S, Alghzawi H. Testing the Impact of the Worksite Heart Health Improvement Project on Cardiovascular Disease Risk Factors Over Time. *J Occup Environ Med* 2018; **60**: 717-23.
21. Edries N, Jelsma J, Maart S. The impact of an employee wellness programme in clothing/textile manufacturing companies: a randomised controlled trial. *BMC Public Health* 2013; **13**: 25.
22. Elliot DL, Goldberg L, Kuehl KS, Moe EL, Breger RK, Pickering MA. The PHLAME (Promoting Healthy Lifestyles: Alternative Models' Effects) firefighter study: outcomes of two models of behavior change. *J Occup Environ Med* 2007; **49**: 204-13.
23. Emmons KM, Linnan LA, Shadel WG, Marcus B, Abrams DB. The Working Healthy Project: a worksite health-promotion trial targeting physical activity, diet, and smoking. *J Occup Environ Med* 1999; **41**: 545-55.
24. Engbers LH, van Poppel MN, van Mechelen W. Modest effects of a controlled worksite environmental intervention on cardiovascular risk in office workers. *Prev Med* 2007; **44**: 356-62.

25. Engbers LH, van Poppel MN, Chin APM, van Mechelen W. The effects of a controlled worksite environmental intervention on determinants of dietary behavior and self-reported fruit, vegetable and fat intake. *BMC Public Health* 2006; **6**: 253.
26. Eshah NF, Bond AE, Froelicher ES. The effects of a cardiovascular disease prevention program on knowledge and adoption of a heart healthy lifestyle in Jordanian working adults. *Eur J Cardiovasc Nurs* 2010; **9**: 244-53.
27. Faghri PD, Li R. Effectiveness of financial incentives in a worksite diabetes prevention program. *Open Obes J* 2014; **6**: 1-12.
28. Fernandez ID, Chin NP, Devine CM, et al. Images of a Healthy Worksite: A Group-Randomized Trial for Worksite Weight Gain Prevention With Employee Participation in Intervention Design. *Am J Public Health* 2015: e1-e8.
29. Fitzgerald S, Buckley L, Perry IJ, et al. The impact of a complex workplace dietary intervention on Irish employees' off-duty dietary intakes. *Health Promot Int* 2019; **70**: 195-201.
30. Flannery K, Resnick B, Galik E, Lipscomb J, McPhaul K, Shaughnessy M. The Worksite Heart Health Improvement Project (WHHIP): feasibility and efficacy. *Public Health Nurs* 2012; **29**: 455-66.
31. French SA, Harnack LJ, Hannan PJ, Mitchell NR, Gerlach AF, Toomey TL. Worksite environment intervention to prevent obesity among metropolitan transit workers. *Prev Med* 2010; **50**: 180-5.
32. Furuki K, Honda S, Jahng D, Ikeda M, Okubo T. The effects of a health promotion program on body mass index. *The Journal of Occupational Health* 1999; **41**: 19-26.
33. Geaney F, Kelly C, Di Marrazzo JS, et al. The effect of complex workplace dietary interventions on employees' dietary intakes, nutrition knowledge and health status: a cluster controlled trial. *Prev Med* 2016; **89**: 76-83.
34. Gerstel E, Pataky Z, Busnel C, et al. Impact of lifestyle intervention on body weight and the metabolic syndrome in home-care providers. *Diabetes Metab* 2013; **39**: 78-84.
35. Glasgow RE, et al. Modifying Dietary and Tobacco Use Patterns in the Worksite: The Take Heart Project. *Health Educ Q* 1997; **21**: 69-82.
36. Glasgow RE, Terborg JR, Hollis JF, Severson HH, Boles SM. Take heart: results from the initial phase of a work-site wellness program. *Am J Public Health* 1995; **85**: 209-16.
37. Goetzel RZ, Roemer EC, Pei X, et al. Second-year results of an obesity prevention program at the Dow Chemical Company. *J Occup Environ Med* 2010; **52**: 291-302.
38. Gomel MK, Oldenburg B, Simpson JM, Chilvers M, Owen N. Composite cardiovascular risk outcomes of a work-site intervention trial. *Am J Public Health* 1997; **87**: 673-6.
39. Gomel M, Oldenburg B, Simpson JM, Owen N. Work-site cardiovascular risk reduction: a randomized trial of health risk assessment, education, counseling, and incentives. *Am J Public Health* 1993; **83**: 1231-8.
40. Gosliner WA, James P, Yancey AK, Ritchie L, Studer N, Crawford PB. Impact of a worksite wellness program on the nutrition and physical activity environment of child care centers. *Am J Health Promot* 2010; **24**: 186-9.
41. Guldan GS, Zhang Y, Huang Y, Yang X, Zeng G. Effectiveness of a worksite nutrition education activity in a factory in China. *Asia Pac J Public Health* 1992; **6**: 8-14.
42. Gysan DB, Millentrup S, Albus C, et al. Substantial improvement of primary cardiovascular prevention by a systematic score-based multimodal approach: A randomized trial: The PreFord-Study. *European journal of preventive cardiology* 2017; **24**: 1544-54.
43. Hebert JR. A Work-Site Nutrition Intervention: Its Effects on the Consumption of Cancer-Related Nutrients. *Am J Public Health* 1993; **83**.
44. Hossain M, Islam Z, Sultana S, et al. Effectiveness of Workplace Nutrition Programs on Anemia Status among Female Readymade Garment Workers in Bangladesh: A Program Evaluation. *Nutrients* 2019; **11**.
45. Hunt MK, Hebert JR, Sorensen G, et al. Impact of a worksite cancer prevention program on eating patterns of workers. *J Nutr Educ* 1993; **25**: 236-44.
46. Hutchinson AD, Howlett G, Wilson C. Increasing employees' fruit consumption through access and peer support at work. *Food and Nutrition Sciences* 2013; **4**: 88-95.
47. Iriyama Y, Murayama N. Effects of a worksite weight-control programme in obese male workers: A randomized controlled crossover trial. *Health Educ J* 2014; **73**: 247-61.
48. Jaime PC, Bandoni DH, Sarno F. Impact of an education intervention using email for the prevention of weight gain among adult workers. *Public Health Nutr* 2014; **17**: 1620-7.
49. Jamal SN, Moy FM, Azmi Mohamed MN, Mukhtar F. Effectiveness of a Group Support Lifestyle Modification (GSLiM) Programme among Obese Adults in Workplace: A Randomised Controlled Trial. *PLoS One* 2016; **11**: e0160343.
50. Jeffery RW, Forster JL, French SA, et al. The Healthy Worker Project: a work-site intervention for weight control and smoking cessation. *Am J Public Health* 1993; **83**: 395-401.

51. Johannig E, Landsbergis P, Geissler H, Karazmann R. Cardiovascular Risk and Back-disorder Intervention Study of Mass Transit Operators. *Int J Occup Environ Health* 1996; **2**: 79-87.
52. Kamioka H, Nakamura Y, Okada S, et al. Effectiveness of comprehensive health education combining lifestyle education and hot spa bathing for male white-collar employees: a randomized controlled trial with 1-year follow-up. *J Epidemiol* 2009; **19**: 219-30.
53. Kouwenhoven-Pasmooij TA, Robroek SJW, Kraaijenhagen RA, et al. Effectiveness of the blended-care lifestyle intervention 'PerfectFit': a cluster randomised trial in employees at risk for cardiovascular diseases. *BMC Public Health* 2018; **18**: 766.
54. Kuehl KS, Elliot DL, Goldberg L, et al. The safety and health improvement: enhancing law enforcement departments study: feasibility and findings. *Frontiers in public health* 2014; **2**: 38.
55. Kushida O, Murayama N. Effects of environmental intervention in workplace cafeterias on vegetable consumption by male workers. *J Nutr Educ Behav* 2014; **46**: 350-8.
56. Kwak L, Kremers SP, Candel MJ, Visscher TL, Brug J, van Baak MA. Changes in skinfold thickness and waist circumference after 12 and 24 months resulting from the NHF-NRG In Balance-project. *Int J Behav Nutr Phys Act* 2010; **7**: 26.
57. Kwak L, Kremers SP, Visscher TL, van Baak MA, Brug J. Behavioral and cognitive effects of a worksite-based weight gain prevention program: the NHF-NRG in balance-project. *J Occup Environ Med* 2009; **51**: 1437-46.
58. LaCaille LJ, Schultz JF, Goei R, et al. Go!: results from a quasi-experimental obesity prevention trial with hospital employees. *BMC Public Health* 2016; **16**: 171.
59. Lassen AD, Thorsen AV, Sommer HM, et al. Improving the diet of employees at blue-collar worksites: results from the 'Food at Work' intervention study. *Public Health Nutr* 2011; **14**: 965-74.
60. Lemon SC, Wang ML, Wedick NM, et al. Weight gain prevention in the school worksite setting: results of a multi-level cluster randomized trial. *Prev Med* 2014; **60**: 41-7.
61. Lemon SC, Zapka J, Li W, et al. Step ahead a worksite obesity prevention trial among hospital employees. *Am J Prev Med* 2010; **38**: 27-38.
62. Limaye T, Kumaran K, Joglekar C, et al. Efficacy of a virtual assistance-based lifestyle intervention in reducing risk factors for Type 2 diabetes in young employees in the information technology industry in India: LIMIT, a randomized controlled trial. *Diabet Med* 2017; **34**: 563-8.
63. Lin YP, Lin CC, Chen MM, Lee KC. Short-Term Efficacy of a "Sit Less, Walk More" Workplace Intervention on Improving Cardiometabolic Health and Work Productivity in Office Workers. *J Occup Environ Med* 2017; **59**: 327-34.
64. Lin TY, Liao PJ, Ting MK, Hsu KH. Lifestyle characteristics as moderators of the effectiveness of weight control interventions among semiconductor workers. *Biomed J* 2018; **41**: 376-84.
65. Linde JA, Nygaard KE, MacLehose RF, et al. HealthWorks: results of a multi-component group-randomized worksite environmental intervention trial for weight gain prevention *Int J Behav Nutr Phys Act* 2012; **9**: 14.
66. Lindquist T. Using lifestyle and coping to reduce job stress and improve health in "at risk" office workers. *Stress Med* 1999; **15**: 143-52.
67. Mache S, Jensen S, Jahn R, Steudtner M, Ochsmann E, Preuss G. Worksite Health Program Promoting Changes in Eating Behavior and Health Attitudes. *Health promotion practice* 2015; **16**: 826-36.
68. Mache S, Jensen S, Linnig S, et al. Do overweight workers profit by workplace health promotion, more than their normal-weight peers? Evaluation of a worksite intervention. *J Occup Med Toxicol* 2015; **10**: 28.
69. Maes S, Verhoeven C, Kittel F, Scholten H. Effects of a Dutch work-site wellness-health program: the Brabantia Project. *Am J Public Health* 1998; **88**: 1037-41.
70. Mansi S, Milosavljevic S, Tumilty S, Hendrick P, Higgs C, Baxter DG. Investigating the effect of a 3-month workplace-based pedometer-driven walking programme on health-related quality of life in meat processing workers: a feasibility study within a randomized controlled trial. *BMC Public Health* 2015; **15**: 410.
71. Meenan RT. Economic evaluation of a worksite obesity prevention and intervention trial among hotel workers in Hawaii (Provisional abstract). *J Occup Environ Med* 2010; **52**: S8-S13.
72. Miller CK, Weinhold KR, Nagaraja HN. Impact of a Worksite Diabetes Prevention Intervention on Diet Quality and Social Cognitive Influences of Health Behavior: A Randomized Controlled Trial. *J Nutr Educ Behav* 2016; **48**: 160-9.e1.
73. Mills PR, Kessler RC, Cooper J, Sullivan S. Impact of a health promotion program on employee health risks and work productivity. *Am J Health Promot* 2007; **22**: 45-53.
74. Morgan PJ, Collins CE, Plotnikoff RC, et al. Efficacy of a workplace-based weight loss program for overweight male shift workers: the Workplace POWER (Preventing Obesity Without Eating like a Rabbit) randomized controlled trial. *Prev Med* 2011; **52**: 317-25.
75. Moy FM, Ab Sallam A, Wong ML. Dietary modification in a workplace health promotion program in Kuala Lumpur, Malaysia. *Asia Pac J Public Health* 2008; **20 Suppl**: 166-72.

76. Moy F, Sallam AA, Wong M. The results of a worksite health promotion programme in Kuala Lumpur, Malaysia. *Health Promot Int* 2006; **21**: 301-10.
77. Olafsdottir AS, Johannsdottir SS, Arngrimsson SA, Johannsson E. Lifestyle intervention at sea changes body composition, metabolic profile and fitness. *Public Health* 2012; **126**: 888-90.
78. Ostbye T, Stroo M, Brouwer RJN, et al. Steps to Health Employee Weight Management Randomized Control Trial Short-Term Follow-Up Results. *J Occup Environ Med* 2015; **57**: 188-95.
79. Pedersen C, Halvari H, Williams GC. Worksite intervention effects on motivation, physical activity, and health: A cluster randomized controlled trial. *Psychol Sport Exerc* 2018; **35**: 171-80.
80. Pegus C, Bazzarre TL, Brown JS, Menzin J. Effect of the Heart At Work program on awareness of risk factors, self-efficacy, and health behaviors. *J Occup Environ Med* 2002; **44**: 228-36.
81. Peters SE, Grant MP, Rodgers J, Manjourides J, Okechukwu CA, Dennerlein JT. A Cluster Randomized Controlled Trial of a Total Worker Health(®) Intervention on Commercial Construction Sites. *Int J Environ Res Public Health* 2018; **15**.
82. Prabhakaran D, Jeemon P, Goenka S, et al. Impact of a worksite intervention program on cardiovascular risk factors: a demonstration project in an Indian industrial population. *J Am Coll Cardiol* 2009; **53**: 1718-28.
83. Racette SB, Deusinger SS, Inman CL, et al. Worksite Opportunities for Wellness (WOW): effects on cardiovascular disease risk factors after 1 year. *Prev Med* 2009; **49**: 108-14.
84. Rameshbabu A, Reddy DM, Ports KA. Learning to health yourself: a randomized, tailored self-regulation intervention among custodial employees. *Health Educ Res* 2018; **33**: 447-57.
85. Raymond LW, Roy DM, Mullinax SL, Yanni A, Pentek KC, Isaacs SE. Preventing Diabetes in the Workplace: Effects of Coaching and Monetary Incentives. *J Occup Environ Med* 2019; **61**: e308-e11.
86. Reynolds KD, Gillum JL, Hyman DJ, et al. Comparing two strategies to modify dietary behavior and serum cholesterol. *J Cardiovasc Risk* 1997; **4**: 1-5.
87. Ribeiro MA, Martins MA, Carvalho CRF. Interventions to Increase Physical Activity in Middle-Age Women at the Workplace: A Randomized Controlled Trial. *Med Sci Sports Exerc* 2014; **46**: 1008-15.
88. Robbins AS, Chao SY, Baumgartner N, Runyan CN, Oordt MS, Fonseca VP. A low-intensity intervention to prevent annual weight gain in active duty Air Force members. *Mil Med* 2006; **171**: 556-61.
89. Rowland SA, Berg KE, Kupzyk KA, et al. Feasibility and Effect of a Peer Modeling Workplace Physical Activity Intervention for Women. *Workplace Health Saf* 2018; **66**: 428-36.
90. Rusali R, Abdul Manaf Z, Shahar S, et al. Comparison of the Effectiveness of Online and Face-to-Face Weight-loss Interventions in the Workplace: Evidence from Malaysia. *Sains Malaysiana* 2018; **47**: 2437-45.
91. Ryu H, Jung J, Cho J, Chin DL. Program Development and Effectiveness of Workplace Health Promotion Program for Preventing Metabolic Syndrome among Office Workers. *Int J Environ Res Public Health* 2017; **14**.
92. Saleh SS, Mohamad S. Alameddine P, MPH;1 Dan Hill, MS;2 Jessica Darney-Beuhler, BS;2 & Ann Morgan, BA.2. The effectiveness and cost-effectiveness of a rural employer-based wellness program. *J Rural Health* 2010; **26**: 259-65.
93. Salinardi TC, Batra P, Roberts SB, et al. Lifestyle intervention reduces body weight and improves cardiometabolic risk factors in worksites. *Am J Clin Nutr* 2013; **97**: 667-76.
94. Scoggins JF, Sakumoto KN, Schaefer KS, Bascom B, Robbins DJ, Whalen CL. Short-term and long-term weight management results of a large employer-sponsored wellness program. *J Occup Environ Med* 2011; **53**: 1215-20.
95. Sforzo GA, Kaye MP, Calleri D, Ngai N. Free choice access to multipoint wellness education and related services positively impacts employee wellness: a randomized and controlled trial. *J Occup Environ Med* 2012; **54**: 471-7.
96. Shimizu T, Horiguchi I, Kato T, Nagata S. Relationship between an interview-based health promotion program and cardiovascular risk factors at Japanese companies. *J Occup Health* 2004; **46**: 205-12.
97. Shrivastava U, Fatma M, Mohan S, Singh P, Misra A. Randomized Control Trial for Reduction of Body Weight, Body Fat Patterning, and Cardiometabolic Risk Factors in Overweight Worksite Employees in Delhi, India. *J Diabetes Res* 2017; **2017**: 7254174.
98. Siegel JM, Prelip ML, Erausquin JT, Kim SA. A worksite obesity intervention: results from a group-randomized trial. *Am J Public Health* 2010; **100**: 327-33.
99. Smith-McLallen A, Heller D, Vernisi K, Gulick D, Cruz S, Snyder RL. Comparative Effectiveness of Two Walking Interventions on Participation, Step Counts, and Health. *Am J Health Promot* 2017; **31**: 119-27.
100. Song Z, Baicker K. Effect of a Workplace Wellness Program on Employee Health and Economic Outcomes: A Randomized Clinical Trial. *JAMA* 2019; **321**: 1491-501.
101. Sorensen G, Barbeau E, Stoddard AM, Hunt MK, Kaphingst K, Wallace L. Promoting behavior change among working-class, multiethnic workers: results of the healthy directions--small business study. *Am J Public Health* 2005; **95**: 1389-95.

102. Sorensen G, Stoddard A, Peterson K, et al. Increasing fruit and vegetable consumption through worksites and families in the treatwell 5-a-day study. *Am J Public Health* 1999; **89**: 54-60.
103. Sorensen G, Thompson B, Glanz K, et al. Work site-based cancer prevention: primary results from the Working Well Trial. *Am J Public Health* 1996; **86**: 939-47.
104. Sorensen G, Morris DM, Hunt MK, et al. Work-site nutrition intervention and employees' dietary habits: the Treatwell program. *Am J Public Health* 1992; **82**: 877-80.
105. Steenhuis I, Van Assema P, Van Breukelen G, Glanz K, Kok G, De Vries H. The impact of educational and environmental interventions in Dutch worksite cafeterias. *Health Promot Int* 2004; **19**: 335-43.
106. Stites SD, Singletary SB, Menasha A, et al. Pre-ordering lunch at work. Results of the what to eat for lunch study. *Appetite* 2015; **84**: 88-97.
107. Strijk JE, Proper KI, van der Beek AJ, van Mechelen W. A worksite vitality intervention to improve older workers' lifestyle and vitality-related outcomes: results of a randomised controlled trial. *J Epidemiol Community Health* 2012; **66**: 1071-8.
108. Tan AM, LaMontagne AD, English DR, Howard P. Efficacy of a workplace osteoporosis prevention intervention: a cluster randomized trial. *BMC Public Health* 2016; **16**: 859.
109. Terry PE, Fowles JB, Xi M, Harvey L. The ACTIVATE study: results from a group-randomized controlled trial comparing a traditional worksite health promotion program with an activated consumer program. *Am J Health Promot* 2011; **26**: e64-73.
110. Thompson WG, Koepf GA, Levine JA. Increasing physician activity with treadmill desks. *Work* 2014; **48**: 47-51.
111. Tucker S, Farrington M, Lanningham-Foster LM, et al. Worksite Physical Activity Intervention for Ambulatory Clinic Nursing Staff. *Workplace Health Saf* 2016.
112. van Berkel J, Boot CR, Proper KI, Bongers PM, van der Beek AJ. Effectiveness of a worksite mindfulness-based multi-component intervention on lifestyle behaviors. *Int J Behav Nutr Phys Act* 2014; **11**: 9.
113. Velema E, Vyth EL, Hoekstra T, Steenhuis IHM. Nudging and social marketing techniques encourage employees to make healthier food choices: a randomized controlled trial in 30 worksite cafeterias in The Netherlands. *Am J Clin Nutr* 2018; **107**: 236-46.
114. Viester L, Verhagen E, Bongers PM, van der Beek AJ. Effectiveness of a Worksite Intervention for Male Construction Workers on Dietary and Physical Activity Behaviors, Body Mass Index, and Health Outcomes: Results of a Randomized Controlled Trial. *Am J Health Promot* 2018; **32**: 795-805.
115. Viitasalo K, Hemio K, Puttonen S, et al. Prevention of diabetes and cardiovascular diseases in occupational health care: feasibility and effectiveness. *Prim Care Diabetes* 2015; **9**: 96-104.
116. Vilela BL, Silva AAB, de Lira CAB, Andrade MD. Workplace Exercise and Educational Program for Improving Fitness Outcomes Related to Health in Workers A Randomized Controlled Trial. *J Occup Environ Med* 2015; **57**: 235-40.
117. Wierenga D, Engbers LH, Van Empelen P, et al. The implementation of multiple lifestyle interventions in two organizations: a process evaluation. *J Occup Environ Med* 2014; **56**: 1195-206.
118. Williams AE, Stevens VJ, Albright CL, Nigg CR, Meenan RT, Vogt TM. The results of a 2-year randomized trial of a worksite weight management intervention. *AJHP* 2014; **28**: 336-9.
119. Wilson MG, DeJoy DM, Vandenberg R, Padilla H, Davis M. FUEL Your Life: A Translation of the Diabetes Prevention Program to Worksites. *Am J Health Promot* 2016; **30**: 188-97.
120. Wilson MG, DeJoy DM, Vandenberg RJ, Corso P, Padilla H, Zuercher H. Effect of Intensity and Program Delivery on the Translation of Diabetes Prevention Program to Worksites: A Randomized Controlled Trial of Fuel Your Life. *J Occup Environ Med* 2016; **58**: 1113-20.
121. Zoellner J, You W, Almeida F, et al. The Influence of Health Literacy on Reach, Retention, and Success in a Worksite Weight Loss Program. *Am J Health Promot* 2016; **30**: 279-82.
